1 Early transcriptome analysis of the brown  
2 streak virus–cassava pathosystem provides  
3 molecular insights into virus susceptibility and  
4 resistance  
5

6 Ravi B. Anjanappa<sup>1\*</sup>, Devang Mehta<sup>1\*</sup>, Michal J. Okoniewski<sup>2,3</sup>, Alicja Szabelska<sup>3,4</sup>, Wilhelm  
7 Gruissem<sup>1</sup> and Hervé Vanderschuren<sup>1,5</sup>

8 <sup>1</sup>Department of Biology, ETH Zurich, Switzerland; <sup>2</sup> ID Scientific IT Services, ETH Zurich, Switzerland; <sup>3</sup>Functional  
9 Genomics Center Zurich, Zurich, Switzerland; <sup>4</sup>Department of Mathematical and Statistical Methods, Poznan  
10 University of Life Sciences, Poland; <sup>5</sup>AGROBIOCHEM Department, Gembloux Agro-Bio Tech, University of Liège,  
11 Belgium

12 \*These authors contributed equally to this work.

13

14 *Author for correspondence:*

15 Hervé Vanderschuren

16 Tel: +32 81 62 25 71/ +41 44 632 87 25

17 Email: [herve.vanderschuren@ulg.ac.be](mailto:herve.vanderschuren@ulg.ac.be)/ [hvanderschuren@ethz.ch](mailto:hvanderschuren@ethz.ch)

18

19 *Running Title:* RNA-seq analysis of the cassava-CBSV pathosystem

## 20 **SUMMARY**

21 Cassava brown streak viruses (CBSVs) are responsible for significant cassava yield losses in eastern  
22 sub-Saharan Africa. In the present work, we inoculated CBSV-susceptible and -resistant cassava  
23 varieties with a mixed infection of CBSVs using top-cleft grafting. Virus titres in grafted scions were  
24 monitored in a time course experiment in both varieties. We performed RNA-seq of the two cassava  
25 varieties at the earliest time-point of full infection in the susceptible scions. Genes encoding proteins  
26 in RNA silencing and salicylic acid pathways were regulated in the susceptible cassava variety but  
27 transcriptional changes were limited in the resistant variety. After infection, genes related to callose  
28 deposition at plasmodesmata were regulated and callose deposition was significantly reduced in the  
29 susceptible cassava variety. We also show that  $\beta$ -1,3-glucanase enzymatic activity is differentially  
30 regulated in the susceptible and resistant varieties. The differences in transcriptional responses to  
31 CBSV infection indicate that resistance involves callose deposition at plasmodesmata but does not  
32 trigger typical anti-viral defence responses. A meta-analysis of the current RNA-seq dataset and  
33 selected, previously reported, host-potyvirus and virus-cassava RNA-seq datasets revealed  
34 comparable host responses across pathosystems only at similar time points after infection or  
35 infection of a common host.

36 Key words: cassava, potyvirus, RNA-Seq, transcriptome, virus resistance, salicylic acid, RDR1, callose

## 37 **HIGHLIGHT**

38 Our results suggest that resistance to CBSV in cassava involves callose deposition at the  
39 plasmodesmata and our meta-analysis of multiple virus-crop RNA-seq studies suggests that  
40 conserved responses across different host-virus systems are limited and depend greatly on time  
41 after infection.

## 42 **INTRODUCTION**

43 Cassava brown streak disease (CBSD) is one of the most damaging cassava virus diseases in Africa  
44 causing harvest losses of up to 70% in susceptible varieties (Hillocks *et al.*, 2001; Legg *et al.*, 2011).  
45 Ongoing CBSD outbreaks are threatening cassava production in sub-Saharan Africa (Legg *et al.*,  
46 2011; Legg *et al.*, 2014) and the recent spread of CBSD into central Africa (Bigirimana *et al.*, 2011;  
47 Mulimbi *et al.*, 2012) indicates that it could soon become a major constraint to cassava production in  
48 all sub-Saharan cassava growing regions.

49 The characteristic symptoms of CBSD include leaf chlorosis and dry hard necrosis in roots, thus  
50 affecting both the quality and yield of the edible storage roots. CBSD is caused by two  
51 phylogenetically distinct cassava brown streak virus species: *Cassava brown streak virus* (CBSV) and  
52 *Ugandan cassava brown streak virus* (UCBSVs) (Mbanzibwa *et al.*, 2011), collectively referred to as  
53 CBSVs. CBSVs are (+) ssRNA viruses belonging to the genus *Ipomovirus*, family Potyviridae (Monger  
54 *et al.*, 2001; Mbanzibwa *et al.*, 2009), and are transmitted by whiteflies (Maruthi *et al.*, 2005). They  
55 consist of a ~9 kb genome with a single open reading frame encoding a large poly-protein, which is  
56 co- and post-translationally cleaved into ten viral proteins (Winter *et al.*, 2010). CBSV and UCBSV  
57 differ in virulence in both controlled and field conditions, with CBSV generally accumulating to  
58 higher titres in most host genotypes (Winter *et al.*, 2010; Mohammed *et al.*, 2012; Kaweesi *et al.*,  
59 2014; Ogwok *et al.*, 2015). Two recent field analyses of different cassava genotypes for the presence  
60 of CBSV and UCBSV found that both viruses co-occurred in a majority of tested genotypes (Ogwok  
61 *et al.*, 2015; Kaweesi *et al.*, 2014).

62 The release of a cassava reference genome (Prochnik *et al.*, 2012) has opened up new opportunities  
63 to perform large-scale characterization of the cassava transcriptome and proteome (Allie *et al.*,  
64 2014; Maruthi *et al.*, 2014; Vanderschuren *et al.*, 2014). Cassava varieties differing in resistance  
65 against cassava geminiviruses (CMGs) were recently analysed in a time course experiment to  
66 identify pathways that are differentially regulated during South African cassava mosaic virus  
67 (SACMV) infection (Allie *et al.*, 2014). Similarly, a late (one year post-infection) time point  
68 comparative transcriptome analysis was reported of transcripts differentially expressed in a

69 susceptible variety (Albert) and a variety (Kaleso) classified as moderately resistant but displaying  
70 mild CBSV symptoms after CBSV infection (Maruthi et al., 2014). The late time point study found no  
71 regulation in cassava homologs of known R-gene analogues, any NBS-LRR genes, nor genes  
72 encoding proteins of the anti-viral RNA silencing pathway. We recently characterised KBH 2006/18  
73 and KBH 2006/26, which are two resistant elite breeding lines with immunity to a mixed infection of  
74 CBSV and UCBSV (Anjanappa et al., 2016). Interestingly, KBH 2006/18 and KBH 2006/26 show no  
75 symptoms or hypersensitive response upon infection, even at 16-weeks post graft-inoculation  
76 (Anjanappa et al., 2016).

77 Here we used two cassava varieties contrasting for CBSV resistance (i.e. 60444 and KBH2006/18) to  
78 characterize the transcriptome response at an early time-point of CBSV and UCBSV co-infection.  
79 We report an in-depth characterisation of pathways and genes regulated in compatible and  
80 incompatible cassava–ipomovirus interactions and present biochemical evidence to explain the  
81 inhibition of virus intercellular movement in the resistant breeding line KBH 2006/18. Our data  
82 provide new insights into the cassava-CBSV interaction and identify commonalities in plant  
83 responses to virus infection.

## 84 **METHODS**

### 85 **Plant material and virus inoculation**

86 The elite CBSV-resistant cassava breeding variety KBH 2006/18 was obtained from IITA (Tanzania)  
87 and the susceptible variety 60444 from the ETH cassava germplasm collection. Cassava plants were  
88 grown under greenhouse conditions (27°C, 16h light, 60% humidity). Infected 60444 stem cuttings  
89 with mixed infection of the CBSV isolate TAZ-DES-01 (KF878104) and the UCBSV isolate TAZ-DES-  
90 02 (KF878103) were used to inoculate KBH 2006/18 and 60444 plants using a previously described  
91 top-cleft grafting method (Moreno *et al.*, 2011; Anjanappa *et al.*, 2016). KBH 2006/18 and 60444  
92 plants were also top-cleft grafted onto virus-free 60444 rootstocks as mock controls. Individual

93 leaves (the second leaf from the point of graft union) were collected from scions of CBSV- and  
94 mock-infected plants at 28 days after grafting (dag) and at 60 dag (Fig. S1).

#### 95 **RT-qPCR**

96 RNA was extracted from cassava leaves using a modified CTAB RNA extraction protocol (Moreno *et*  
97 *al.*, 2011). One  $\mu\text{g}$  of DNaseI-treated total RNA was reverse-transcribed using the RevertAid First  
98 Strand cDNA Synthesis Kit (Thermo-Fisher) according to the manufacturer's instructions. RT-qPCR  
99 was performed with SYBR Green dye (Thermo-Fisher) using a 7500 Fast Real Time PCR System  
100 (Applied Biosystems). Three independent biological replicates were analysed for each time-point.  
101 The relative expression level of individual genes in each sample was calculated as previously  
102 described (Moreno *et al.*, 2011; Vanderschuren *et al.*, 2012). Primers used to validate differentially  
103 expressed genes and to quantitate virus titres are listed in Table S1.

#### 104 **Illumina RNA-Seq and data analysis**

105 Library preparation and sequencing were performed as follows: 5  $\mu\text{g}$  of total RNA extract was  
106 treated with DNase according to manufacturer instructions (Qiagen, RNase-free DNase Kit) and  
107 subsequently column purified using the RNeasy Plant Mini Kit (Qiagen). RNA quality was assessed  
108 using a Qubit® (1.0) Fluorometer (Thermo-Fisher) as well as a Bioanalyzer 2100 (Agilent). Samples  
109 with a RNA integrity number (RIN) above 6 were used for sequencing. One  $\mu\text{g}$  of total RNA was  
110 polyA enriched and mRNA libraries were synthesized using a TruSeq RNA Sample Prep Kit v2  
111 (Illumina). Cluster generation was done using 10 pM of pooled normalized libraries on the cBOT with  
112 TruSeq PE Cluster Kit v3-cBot-HS (Illumina) and subsequently Illumina HiSeq 2000 sequencing was  
113 performed to generate the reads.

#### 114 **Sequence assembly, mapping to the cassava genome and identification of differentially** 115 **expressed genes (DEGs)**

116 The raw read files were trimmed using the trim sequence tool in the CLC Genomics Workbench v8.5  
117 and settings declared in Notes S1. Unique trimmed reads were mapped to the *M. esculenta*

118 reference genome AM560-2 v6.0 available on Phytozome ([www.phytozome.jgi.doe.gov](http://www.phytozome.jgi.doe.gov)) using the  
119 transcriptomics toolbox in the CLC Genomics Workbench v8.5. Empirical analysis of differentially  
120 expressed reads was performed using default parameters to identify differentially expressed genes  
121 (DEGs) between control non-infected and CBSVs-infected scions. DEGs were then filtered based on  
122 a FDR-corrected P-value of <0.01 and a fold-change of  $\geq 2$ . DEGs were annotated in the CLC  
123 Workbench using the Phytozome GFF3 annotation file ([www.phytozome.jgi.doe.gov](http://www.phytozome.jgi.doe.gov)).

#### 124 **Identification of de novo assembled transcripts (dnATs)**

125 Read mapping of trimmed reads was performed using the transcriptomics toolbox in the CLC  
126 Genomics Workbench v8.5 with settings described in Notes S1 but with "Maximum number of hits  
127 for a read = 10", allowing for more stringent detection of unmapped reads. Unmapped reads for  
128 each cassava variety were pooled and assembled using Trinity (Grabherr *et al.*, 2011) with default  
129 settings. Assembled contigs were then size-filtered and contigs greater than 1000 nt were classified  
130 as *de novo* assembled transcripts (*dnATs*). Differential expression of *dnATs* between infected and  
131 mock-infected samples was determined using STAR (Dobin *et al.*, 2013).

#### 132 **Determination of full-length virus genomes from RNA-Seq analysis**

133 Unmapped reads (described previously) were assembled into contigs using the CLC Genomics  
134 Workbench *de novo* assembly tool. The assembled contigs were BLASTed against published CBSV  
135 (HG965221.1) and UCBSV (HG965222.1) genomes to identify full length virus genomes. Two full  
136 length genomes corresponding to CBSV (TAZ-DES-01; KF878104) and UCBSV (TAZ-DES-02;  
137 KF878103) were obtained as single assembled contigs. The two full-length viral genomes were used  
138 to map reads from each individual sample (Fig. S1) using CLC Genomics Workbench read mapping  
139 to contigs tool in order to estimate virus read counts per sample and read count distribution across  
140 the virus genomes.

#### 141 **$\beta$ -1,3-glucanase enzymatic assay**

142 Leaf samples from three independent cassava scions were collected and soluble proteins were  
143 extracted from 100 mg of leaf powder in 300  $\mu$ l of extraction buffer (20 mM HEPES, pH 8.0, 5 mM  
144  $MgCl_2$  and 1 tablet/50 ml buffer of EDTA-free protease inhibitor) and quantitated using the BCA  
145 assay. The amount of glucose content released by the activity of  $\beta$ -1,3-glucanase in a known amount  
146 of soluble proteins in presence of the substrate laminarin (*Laminaria digitata*, Sigma-Aldrich) was  
147 then measured spectrophotometrically at 540 nm (Ramada *et al.*, 2010).  $\beta$ -1,3-glucanase specific  
148 activity was subsequently calculated, with 1 unit (U) of activity representing the amount of enzyme  
149 required to produce 1  $\mu$ mol of reducing sugar per minute.

### 150 **Quantification of plasmodesmata-associated callose**

151 Leaf sections from uninfected and infected scions were stained overnight with Aniline blue (Merck)  
152 using a previously described method (Guenoune-Gelbart *et al.*, 2008). Stained leaf samples were  
153 then examined using a Zeiss LSM 780 laser confocal microscope with a 40X water-immersion  
154 objective. Callose accumulation was detected at an excitation of 405 nm and emission between 413  
155 and 563nm was recorded. Callose quantification and deposit counting was performed as described  
156 by Zavaliev & Epel (2015) for eight replicate images per plant variety and treatment condition.

### 157 **Pfam-based meta-analysis**

158 For Pfam-based meta-analysis, RNA-Seq DEG data were downloaded from published reports (Allie  
159 *et al.*, 2014; Rubio *et al.*, 2015 a,b; Maruthi *et al.*, 2014) and filtered using an absolute fold-change of  
160  $\geq 2$ . Pfam annotations for genomes of each species were obtained from Phytozome annotation files  
161 ([www.phytozome.jgi.doe.gov](http://www.phytozome.jgi.doe.gov)). Commonly regulated Pfams were determined by constructing a 5-  
162 set Venn diagram and the resulting Pfam overlaps between pairs of sets were used to calculate a  
163 pairwise similarity matrix.

## 164 **RESULTS:**

### 165 **CBSV inoculation induces greater transcriptome modulation in susceptible cassava**

166 Following successful grafting of 60444 and KBH2006/18 virus-free scions onto rootstocks with a  
167 mixed infection of CBSV (TAZ-DES-01) and UCBSV (TAZ-DES-02) (CBSV-infection in short), we  
168 performed a time course sampling of the scions at 16, 22 and 28 days after grafting (dag) (Fig. S1).  
169 We assessed virus titres in inoculated and mock scions at the selected time points. Virus infection  
170 reached homogenous titre levels across the three biological replicates only at 28 dag in inoculated  
171 60444 scions (Fig. S2). No virus was detected in KBH 2006/18 scions (Fig. S2), consistent with  
172 previous results (Anjanappa *et al.*, 2016). Notably, we did not observe CBSV symptoms in any  
173 inoculated plant at 28 dag. Samples from 60444 and KBH2006/18 scions at 28 dag were selected for  
174 transcriptome analysis.

175 Gene expression in 60444 and KBH 2006/18 from non-inoculated and CBSV-inoculated scions  
176 collected at 28 dag was analysed using Illumina HiSeq 2000 sequencing. Total RNA from the second  
177 emergent leaf immediately after the graft-union was used for RNA-Seq analysis, with three  
178 independent replicates per condition and plant variety. A total of 1,254,619,280 reads with 100-bp  
179 paired-ends were generated from the 12 samples, ranging from 77 to 121 million reads per sample.  
180 On average, 93.4% of the total reads were successfully mapped to the cassava reference genome  
181 (*M. esculenta* AM560-2 v6.0). The reads not mapped to the reference genome were assembled *de*  
182 *novo* using Trinity (Grabherr *et al.*, 2011). The size-selected Trinity-assembled contigs, referred to as  
183 *de novo* assembled transcripts (*dnATs*), were subsequently blasted against the NCBI nucleotide  
184 collection to provide gene descriptions. The *dnATs* were then used for differential gene expression  
185 analysis using STAR (Dobin *et al.*, 2013). None of the *dnATs* appeared to be differentially regulated  
186 in compatible and incompatible cassava-CBSV pathosystems (Table S2).

187 A total of 1,292 genes in 60444 and 585 genes in KBH 2006/18 were differentially expressed at 28  
188 dag, reflecting a higher number of modulated genes in the compatible host-virus interaction (Table  
189 S3). Over 68% of all differentially expressed genes (DEGs) were up-regulated in variety 60444 while  
190 only 30% were up-regulated in KBH 2006/18. A total of 158 DEGs were common between both  
191 varieties, and a major proportion (99 DEGs) of these were down-regulated (Fig. 1a). Among the



192 DEGs found in both plant varieties, only 12 genes were differently regulated (i.e. up-regulated in  
193 60444 and down-regulated in KBH 2006/18 or vice-versa) (Fig.1a).

#### 194 **Comparison and validation of RNA-Seq data**

195 The RNA-Seq expression results of three significantly regulated genes (*PLASMODESMATA*  
196 *LOCATED PROTEIN 1(PDLP1)*, *CALRETICULIN 1B (CRT1B)*, *HEAT SHOCK PROTEIN 17.6 (HSP17.6)*)  
197 and one non-significantly regulated gene (*CALRETICULIN 3 (CRT3)*), were confirmed using RT-qPCR  
198 on the same RNA samples used for sequencing. Fold-change values (comparing infected and non-  
199 infected samples) for these RNAs were similar to those observed in the RNA-Seq analysis (Fig. S3).  
200 We used unmapped reads to *de novo* assemble the full-length virus genomes of CBSV (TAZ-DES-  
201 01) and UCBSV (TAZ-DES-02). Full-length virus genome contigs were used for read counts to  
202 estimate virus abundance in each sample used for RNA-Seq (Fig. S4). Read counts detected for  
203 CBSV (TAZ-DES-01) and UCBSV (TAZ-DES-02) indicated that CBSV (TAZ-DES-01) was more  
204 prevalent than UCBSV (TAZ-DES-02) in two of the three inoculated 60444 scions. The read count  
205 analysis confirmed the absence of both CBSVs in the inoculated KBH2006/18 scions (Table S4).

#### 206 **Gene sets enriched in resistant and susceptible cassava**

207 We performed Gene Set Enrichment Analysis using the PlantGSEA toolkit (Yi *et al.*, 2013)) to  
208 identify significantly enriched gene ontology (GO) categories and KEGG pathways (Table S4).  
209 Significantly enriched GO categories (Biological Process) were then summarized and visualized  
210 based on semantic similarity using REVIGO (Supek *et al.*, 2011) (Fig. 1b). As expected, genes related  
211 to stimulus response, immune system process and photosynthesis were significantly regulated in  
212 both the susceptible and resistant plant varieties (Fig. 1b).

213 We also examined KEGG-annotated pathways enriched after virus infection in both varieties by  
214 mapping DEGs onto enriched KEGG pathways using Pathview (Luo and Brouwer, 2013) (Table S4).  
215 In both resistant and susceptible varieties, genes in photosystem I and II as well as the light  
216 harvesting complex are down-regulated. Pathways related to phenylalanine metabolism,

217 phenylpropanoid biosynthesis and downstream products of phenylpropanoid biosynthesis were  
218 enriched in the infected 60444 scions along with several genes involved in plant-pathogen  
219 interactions. In KBH 2006/18, the cyanoamino metabolism, starch and sucrose metabolism  
220 pathways were enriched. Interestingly, the phenylpropanoid pathway was also overrepresented in  
221 KBH 2006/18, but it showed an opposite response as compared to the infected 60444 variety.

222 A recent transcriptome study identified the downregulation of nuclear genes encoding chloroplast  
223 proteins (NGCPs) as a key response to PAMP (specifically, bacterial pathogen) perception (Shi *et al.*,  
224 2015). Considering the overrepresentation of chloroplast-related genes (TAIR GO:0009507) in our  
225 data sets, we further investigated the relative abundance of NGCP transcripts regulated by CBSV  
226 infection. In 60444, 7% of all cassava NGCPs (193 out of 2682 cassava NGCPs), which represent 15%  
227 of the total DEGs, were regulated upon infection. In KBH 2006/18, 19% of all DEGs are NGCPs (Fig.  
228 1c). In both varieties, a majority of NGCPs were down-regulated (Table S4), indicating that CBSV  
229 inoculation induces a chloroplastic response, as observed with other PAMPs in Arabidopsis (Göhre *et*  
230 *al.*, 2012; Zheng *et al.*, 2012; de Torres Zabala *et al.*, 2015).

### 231 **CBSV infection modulates callose deposition at plasmodesmata**

232 In a previous study investigating the cassava-CBSV pathosystem we found that KBH 2006/18 allows  
233 transmission of CBSVs through the stem vasculature while no virus can be detected in KBH 2006/18  
234 leaves (Anjanappa *et al.*, 2016). This suggests that the resistance of KBH 2006/18 to CBSVs involves  
235 at least restriction of inter-cellular virus movement from vascular tissues to mesophyll cells. Here we  
236 find that transcript levels of genes involved in virus movement and callose deposition at  
237 plasmodesmata were regulated in infected 60444 but not KBH 2006/18 leaves. The transcript level  
238 of  $\beta$ -1,3-GLUCANASE (*BG3*) encoding an enzyme which degrades callose at the plasmodesmata  
239 (Iglesias and Meins Jr, 2000), was 9.7-fold up-regulated in 60444 (Fig. 2a). ANKYRIN REPEAT  
240 FAMILY PROTEINS (ANKs) allow viral movement through plasmodesmata by promoting callose  
241 degradation (Ueki *et al.*, 2010). We also found an upregulation of two different cassava ANKs,  
242 Manes.11G035500 (3.8-fold) in 60444 and Manes.05G056700 (2.03-fold) in KBH 2006/18. The

243 expression of *PLASMODEMATA-LOCATED PROTEIN 1 (PDLP1)*, which is a positive regulator of virus  
244 cell-to-cell movement, was upregulated in infected 60444. PDLP1 binds to viral movement proteins  
245 and helps the formation of viral movement tubules at the plasmodesmata (Amari *et al.*, 2010),  
246 thereby facilitating virus cell-to-cell movement. In contrast, the expression of a possible negative  
247 regulator of plasmodesmata permeability, *GLUCAN SYNTHASE LIKE 4 (GSL4)* (Maeda *et al.*, 2014),  
248 was also up-regulated by 2.6-fold in 60444 (Fig. 2a).

249 We further characterized *BG3* expression levels at 60 dag to follow the regulation of this gene in  
250 infected and symptomatic 60444 leaves. Up-regulation of *BG3* expression was attenuated at 60 dag  
251 as the CBSV infection progressed. Consistently, no significant change of *BG3* expression was  
252 observed in KBH 2006/18 leaves at 60 dag (Fig. 2b). The higher *BG3* transcript levels resulted in a  
253 38% increase in *BG3* enzymatic activity in infected 60444 leaves (Fig. 2b).

254 In order to understand the functional implications of the simultaneous upregulation of positive  
255 (*PDLP1*, *GSL4*) and negative (*BG3*, *ANKs*) regulators of callose deposition upon CBSV infection, we  
256 stained callose in leaf tissue from 60444 and KBH 2006/18 at 60 days after grafting (Fig. 2c). This  
257 revealed a significant decrease in plasmodesmata-associated callose deposition in epidermal cells of  
258 infected 60444 leaves and a strong increase in the amount of plasmodesmata-associated callose  
259 deposition in KBH 2006/18.

## 260 **Salicylic acid defence and lignin biosynthesis pathways are regulated in response to** 261 **CBSVs**

262 Overall, we found that in the susceptible cassava variety 60444 defence pathways were more  
263 extensively regulated during CBSV infection as compared to the resistant variety KBH 2006/18.  
264 Transcript levels for several genes encoding the enzymes involved in lignin and SA biosynthesis were  
265 up-regulated in the compatible cassava-CBSV interaction and not regulated or down-regulated in  
266 the incompatible interaction (Fig. 3). Both SA and lignin biosynthetic pathways follow the  
267 phenylpropanoid pathway, which was enriched in our initial KEGG pathway gene-set analysis (Table  
268 S4).

269 SA biosynthesis in plants begins in the chloroplast with the shikimate pathway for synthesis of  
270 aromatic amino acids, which in turn is fed by fructose-1,6-bisphosphate (Fig. 3). Although fructose-  
271 1,6-bisphosphate is probably not a limiting precursor for SA biosynthesis, we did observe a 4.6-fold  
272 up-regulation of the PHOSPHOFRUCTOKINASE 3, a gene involved in the conversion of fructose-6-  
273 phosphate to fructose-1,6-bisphosphate in the susceptible variety. We also observed a 2.4-fold up-  
274 regulation of the *SHIKIMATE KINASE 3*, responsible for the conversion of shikimate to shikimate-3-  
275 phosphate. Previous genetic studies in *Arabidopsis* and *Nicotiana benthamiana* (reviewed by Chen *et*  
276 *al.*, 2009) have indicated that pathogen-induced SA synthesis is catalysed by ISOCHORISMATE  
277 SYNTHASE (ICS) to convert chorismate to isochorismate, which is then used to produce SA by an  
278 unknown mechanism. An alternative pathway for SA biosynthesis from chorismate involves its  
279 conversion to arogenate, which is the substrate of AROGENATE DEHYDRATASE (ADT) to produce  
280 phenylalanine. *ADT1* and *ADT6* were upregulated in 60444 after CBSV infection, suggesting that  
281 virus-induced SA synthesis in cassava, unlike in *N. benthamiana* (Catinot *et al.*, 2008), might proceed  
282 through the phenylalanine pathway rather than via isochorismate. PHENYLALANINE AMMONIA-  
283 LYASE (PAL), which catalyses the conversion of phenylalanine to cinnamic acid, is a key enzyme in  
284 the synthesis of both lignin and SA. Indeed, quadruple *pal* mutants with only 10% PAL activity  
285 produced about 50% less SA and were more susceptible to biotic stress (Huang *et al.*, 2010). We find  
286 that *PAL1* (Manes.10G047500) and *PAL2* (Manes.07G098700) were 4.4-fold and 2.7-fold up-  
287 regulated, respectively, in 60444. In contrast, *PAL1* was downregulated 2.3-fold in KBH 2006/18.  
288 Cinnamic acid is the substrate at the branch point of the SA and lignin biosynthesis pathways.  
289 Ligation of cinnamic acid to Coenzyme A by 4-COUMARATE:COA LIGASE (4CL) leads to SA  
290 biosynthesis via both peroxisomal  $\beta$ -oxidative and cytosolic non-oxidative pathways. The conversion  
291 of cinnamic acid first to p-coumaric acid by CINNAMATE-4-HYDROXYLASE (*C4H*) and then ligation  
292 of Coenzyme A to p-coumaric acid by 4CL produces p-coumaroyl-CoA, which is a phenylpropanoid  
293 pathway precursor (Widhalm and Dudareva, 2015). In our study, *4CL1* (Manes.14G151400,  
294 Manes.04G095300), *4CL2* (Manes.11G071800), *4CL3* (Manes.09G127000.1) and *C4H*  
295 (Manes.02G227200) were all up-regulated in CBSV-infected 60444 (Fig. 3).

296 SA is a key regulator of plant defence responses and has been implicated in various mechanisms  
297 resulting in the hypersensitive response (HR) and systemic acquired resistance (SAR) (reviewed in  
298 Vlot *et al.*, 2009). One such mechanism is the NPR1-dependent response (Vlot *et al.*, 2009), which  
299 involves the SA-induced activation and nuclear localisation of NPR1 to activate the transcription of  
300 genes for pathogenesis-related proteins, including BG3. NPR1 interacts with various members of  
301 the TGA family of transcription factors, which together activate the expression of WKRY  
302 transcription factors (Vlot *et al.*, 2009). We find that *TGA9* (Manes.04G004100) expression was up-  
303 regulated by 2.8-fold in CBSV-infected 60444, together with the upregulation of two cassava  
304 *WRKY70* genes (Manes.07G142400 by 4.5-fold and Manes.10G002200 by 2.5-fold). In Arabidopsis,  
305 *WRKY70* is an SA-induced transcription factor that activates the expression of several pathogenesis-  
306 related genes, including genes encoding a peroxidase and senescence-associated proteins (*SAG12*,  
307 *SAG21*, *SAG24*, *SAG29*) (Li *et al.*, 2004; Ülker *et al.*, 2007). In CBSV-infected 60444, *SAG12*  
308 (Manes.16G038400) was upregulated 3.6-fold (Fig. 3, Table S3). Similarly, the genes encoding 10 out  
309 of 14 Class III peroxidases (Prxs, or PR-9 subfamily), which are involved in SA-induced pathogen  
310 defence responses (Almagro *et al.*, 2009), were upregulated (Fig. 3).

311 Lignins are polymers of aromatic compounds and integral components of the plant cell wall. They  
312 have a role in defence against microbial and fungal pathogens (Vanholme *et al.*, 2010; Miedes *et al.*,  
313 2014). Lignin synthesis is often induced in plant immune responses (Malinovsky *et al.*, 2014). We find  
314 several genes encoding enzymes involved in the production of phenylpropanoid intermediates and  
315 their conversion to the three monolignols that were up-regulated after CBSV infection in 60444  
316 (Fig. 3, Table S3).

### 317 **The antiviral RNA silencing pathway is up-regulated in the compatible cassava-CBSVs** 318 **interaction**

319 RNA silencing is a major defence mechanism against plant viruses (Wang *et al.*, 2012), especially  
320 against RNA viruses, whose genomes and their replicative forms can be directly targeted by RNA-  
321 induced Silencing Complexes (RISCs) and DICER-LIKE (DCL) proteins (Waterhouse and Fusaro,

322 2006). RNA silencing is thought to begin with the synthesis and formation of long dsRNA molecules,  
323 which are substrates of DCL proteins in plants (Fig. 4) (Pumplin and Voinnet, 2013). In Arabidopsis,  
324 four DCL proteins are involved in RNA silencing, of which DCL2 and DCL4 have overlapping  
325 functions in antiviral defence (Garcia-Ruiz *et al.*, 2010). However, DCL4 alone is sufficient for  
326 antiviral RNA silencing (Garcia-Ruiz *et al.*, 2010). DCL2 appears to be required for the production of  
327 secondary small interfering RNAs (siRNAs) (Parent *et al.*, 2015). We find that the expression of three  
328 cassava *DCL2* genes was increased in CBSV-infected 60444 (Manes.12G002700 by 2.4-fold,  
329 Manes.12G002800 by 3.3-fold, Manes.12G003000 by 3.3-fold).

330 ARGONAUTE (AGO) are essential proteins of the RNA Induced Silencing Complexes (RISCs), which  
331 are involved in the sequence-specific silencing of genes by RNA degradation, inhibition of  
332 translation and epigenetic modifications. Of the 10 AGO proteins known in plants, AGO2 has a  
333 broad and likely specific role in antiviral silencing (Jaubert *et al.*, 2011; Carbonell *et al.*, 2012;  
334 Scholthof *et al.*, 2011). Expression of the cassava *AGO2* gene (Manes.07G023100) was 17.5-fold up-  
335 regulated in CBSV-infected 60444 scions. A gene expressing *AGO5* (Manes.04G011400), which is  
336 another but less well characterised AGO protein, was also up-regulated 2.3-fold. The virus-induced  
337 increased expression of *AGO2* and *AGO5* in cassava is similar to *N. benthamiana*, in which Potato  
338 Virus X infection increases *AGO5* expression and *AGO5* acts synergistically with *AGO2* to suppress  
339 virus infection to a greater degree than the other AGO proteins (Brosseau and Moffett, 2015).

340 RNA-DEPENDENT RNA POLYMERASE 1 (RDR1) is an important component of the post-  
341 transcriptional gene silencing (PTGS) immune response to virus infections and is involved in the  
342 defence of various classes of viruses, including potyviruses. (Rakhshandehroo *et al.*, 2009; Garcia-  
343 Ruiz *et al.*, 2010; Wang *et al.*, 2010; Lee *et al.*, 2016). RDRs catalyse the synthesis of the antisense  
344 strand in the conversion of viral RNA to a long dsRNA template that can be processed by DCLs.  
345 PTGS is often initiated by siRNAs binding to a target and recruiting RDRs, which then results in the  
346 production of further long dsRNA templates for the production of secondary siRNAs. This  
347 mechanism, also known as transitivity or silencing amplification, is largely facilitated by RDR6, and

348 possibly also RDR1 (Wang *et al.*, 2010). We find that expression of *RDR1* (Manes.17Go84800) was  
349 highly up-regulated (38.5-fold) in CBSV-infected 60444 scions (Fig. 4). The steep up-regulation of  
350 *RDR1* was sustained at all three early time points (Fig. S5). The precise role of RDR1 in virus  
351 resistance has not yet been established, and one study in particular (in *N. benthamiana*)  
352 demonstrated a repressor function of RDR1 in antiviral silencing (Ying *et al.*, 2010). It is also possible  
353 that RDR1 contributes to virus resistance by targeting host genes. Cao *et al.* (2014) identified 369  
354 genes as potential RDR1 targets and validated the *RDR1*-dependent reduction in transcription of  
355 *PHOTOSYSTEM II LIGHT HARVESTING COMPLEX B1.3 (LHCB1.3)* gene in response to potyvirus  
356 infection. We consistently observed a 3.4-fold downregulation of *LHCB1.3* (Manes.17Go66700) in  
357 CBSV-infected 60444 scions. However, of the 26 putative RDR1 target genes (out of the 369 genes  
358 identified by Cao *et al.*, (2014)) regulated in our study, only 13 were down-regulated (Table S6).

359 The expression of the PTGS-related genes *SILENCING DEFECTIVE 5 (SDE5)* and *SUPPRESSOR OF*  
360 *GENE SILENCING 3 (SGS3)* were also significantly up-regulated in CBSV-infected 60444 (Fig. 3, Table  
361 S3) but not changed in CBSV-infected KBH 2006/18. *AGO2* and *RDR1*, which are both up-regulated  
362 in CBSV-infected 60444, are also induced by SA signalling pathways (Lewsey *et al.*, 2010; Jovel *et al.*,  
363 2011; Hunter *et al.*, 2013; Lee *et al.*, 2016), which is consistent with the upregulation of several  
364 cassava genes involved in SA synthesis and signalling pathways after CBSV infection.

### 365 **Similar transcript regulation in selected host-potyvirus and cassava-virus pathosystems**

366 We performed a comparative analysis of the DEGs we detected above with other RNA-Seq studies  
367 of host-virus pathosystems to understand similarities and differences in gene expression regulation.  
368 The studies we selected involved naturally occurring crop-virus interactions with detectable host  
369 responses to potyvirus infections and comparable RNA-Seq data sets (late-stage cassava-CBSV  
370 infection, Maruthi *et al.*, 2014; early-stage peach and late-stage apricot infection with Plum Pox  
371 Virus, Rubio *et al.*, 2015a,b). We also included an RNA-Seq study of cassava infected with South  
372 African Cassava Mosaic Virus, a ssDNA geminivirus pathosystem (Allie *et al.*, 2014), to compare the  
373 response of cassava to two different virus types.

374 We first filtered DEGs from all datasets according to our differential expression criteria (fold change  
375 >2; FDR <0.01) and used Pfam identifiers (Finn *et al.*, 2015) matching each DEG as a common term to  
376 compare gene expression between cassava and the two Prunus species. This allowed us to construct  
377 a similarity matrix based on a pairwise similarity percentage score, where 100% denotes complete  
378 similarity (Fig. 5a, grey boxes). The greatest pairwise similarity (25.54%) was found between peach  
379 and cassava RNA-Seq datasets obtained within two-months post-infection. Interestingly, we found  
380 more common Pfam identifiers between our early time-point cassava-CBSV dataset and the early  
381 time-point cassava-SACMV dataset rather than between the two cassava-CBSV datasets. Also, the  
382 two cassava-CBSV datasets and the two Prunus datasets had a lower degree of similarity than most  
383 other pairs, indicating a strong temporal component to the modulation of host gene expression  
384 after virus infection. Our meta-analysis did not reveal a strong dependence of host gene expression  
385 changes on either RNA or DNA virus or host genus.

386 We next compared up- and down-regulated DEGs separately across the five datasets (Fig. 5b,c;  
387 Table S5) and found five Pfam identifiers in common for up-regulated and four for down-regulated  
388 DEGs. Of these, three Pfams that contained genes in both the up- and down-regulated data-sets in  
389 all pathosystems included PF01190 (pollen protein Ole e I-like), PF00249 (Myb-like DNA-binding  
390 domain) and PF03168 (late embryogenesis-abundant protein). While PF01190 represents a largely  
391 uncharacterised protein family, the other two identifiers comprise stress response genes. Genes  
392 belonging to PF00067 are up-regulated in all pathosystems and this Pfam comprises the  
393 cytochrome P450 protein family, which includes members involved in the synthesis of plant defence  
394 compounds. Genes encoding members of the GDSL-like lipase family (PF00657) are also up-  
395 regulated in all pathosystems and are required for systemic ethylene-mediated resistance (Kwon *et*  
396 *al.*, 2009; Kim *et al.*, 2013).

397 In addition to the Pfams common to all RNA-Seq datasets, genes in another three Pfams were found  
398 up- and four were down-regulated in all potyvirus infection studies (Fig. 5b,c). Of these, genes



399 belonging to PF02365 (NO APICAL MERISTEM protein) and PFO0847 (APETALA 2 domain protein)  
400 were found in both the up- and down-regulated data sets.

## 401 DISCUSSION

402 We show that the transcriptional response of cassava to CBSV infection was significantly stronger in  
403 the susceptible 60444 variety than the resistant KBH 2006/18 variety. This is similar to results  
404 reported earlier for extreme virus resistance in potato (Goyer *et al.*, 2015). To ensure that our dataset  
405 represents the earliest time-point of complete virus infection, we first measured virus titres in the  
406 inoculated scions at three time-points until we found consistent infection in all 60444 plants (Fig.  
407 S2). This allowed us to analyse changes in gene expression prior to symptom development, and thus  
408 early in the infection process. While graft inoculation may delay infection until the graft junction is  
409 fully established, we previously demonstrated consistent infection using the top-grafting method  
410 (Moreno *et al.*, 2011; Vanderschuren *et al.*, 2012; Anjanappa *et al.*, 2016). Graft virus transmission  
411 using field-infected rootstocks or scions was necessary because no infectious CBSV clones are  
412 available (Mohammed *et al.*, 2012; Vanderschuren *et al.*, 2012; Wagaba *et al.*, 2013; Anjanappa *et al.*,  
413 2016). Although the lack of detectable virus titres in KBH 2006/18 indicates the absence of viral  
414 replication in the resistant cultivar, we observed a transcriptional response to graft-inoculation. It is  
415 currently unknown if this is due to the local recognition of viral RNAs and/or proteins, which are  
416 mobilized in the vascular tissues after the graft was established, or to an extended systemic  
417 response transmitted by the CBSV-susceptible rootstock to the CBSV-resistant scion.

418 Based on the DEGs in the susceptible variety, 60444, we found that CBSV infection increases the  
419 expression of genes encoding SA synthesis enzymes, which likely increases SA levels that activate  
420 SA-regulated genes involved in antiviral responses. Our data suggest that in CBSV-infected cassava  
421 SA is synthesized via the phenylalanine rather than the isochorismate pathway. Additionally, we  
422 found genes encoding proteins of the DCL2/AGO5/AGO2-mediated anti-viral silencing response  
423 were upregulated in CBSV-infected 60444 but not KBH 2006/18. The silencing response may be

424 amplified as indicated by the strong upregulation of the gene encoding RDR1, but it is also possible  
425 that RDR1 assists in the repression of RDR6-mediated silencing amplification (Ying et al., 2010).

426 The susceptible 60444 and resistant KBH 2006/18 varieties differed strongly in callose deposition at  
427 plasmodesmata during CBSV infection. While DEGs associated with virus movement through  
428 plasmodesmata were found only in CBSV-infected 60444, callose deposition at plasmodesmata was  
429 reduced in 60444 and increased in KBH 2006/18, which could only be partially explained by the  
430 detected DEGs. Nevertheless, the results are consistent with the limitation of CBSV movement in  
431 KBH2006/18 from stems into leaves (Anjanappa *et al.*, 2016). An efficacious CBSV infection of  
432 susceptible 60444 variety thus involves a virus-induced reduction in callose deposition at the  
433 plasmodesmata that is absent in the resistant KBH2006/18 variety.

434 The meta-analysis of our RNA-Seq dataset and other plant-virus RNA-Seq datasets revealed a low  
435 level of similarity in host transcriptome responses to different virus types and at different time-  
436 points of infection. A previous transcriptome-based meta-analysis of plant-virus interactions  
437 compared transcriptional responses in *Arabidopsis* after infection with different virus species  
438 (Rodrigo *et al.*, 2012). Their results indicated a correlation between host transcriptome response and  
439 virus phylogeny, with closely related viruses generating transcript regulation of similar host genes.  
440 Since our analysis did not involve a model plant, we managed differences in genome annotations in  
441 different species by using Pfam identifiers. While Pfam identifiers reduce resolution because they  
442 represent protein families instead of specific genes, this approach does not require identification of  
443 exact gene orthologs across multiple species. Thus, this allows the comparison of transcriptome  
444 regulation between different viruses and plant species. Overall, we found only a small number of  
445 common Pfam identifiers, even between different hosts of the same genus or between viruses of the  
446 same family. However, based on the numbers of common Pfam identifiers, there was strong  
447 temporal impact on gene regulation after virus infection, indicating that earlier transcript-level  
448 changes are perhaps most diagnostic to infection by different viruses. Pfam identifiers that were  
449 found in common across the selected pathosystems did not relate to classical defence pathways but

450 rather to protein families implicated in developmental processes. A previous review of expression-  
451 profile studies also found commonalities within developmental genes across various compatible  
452 pathosystems (Whitham *et al.*, 2006). The common regulation of developmental genes might  
453 describe similarities in symptom development or downstream signalling processes rather than in  
454 primary immune responses across different host-virus interactions.

455 Together, our study suggests that analysis of early time-points during virus-host interactions  
456 captures the emerging impact of virus replication on host gene expression. For example, our RNA-  
457 Seq dataset from scion leaves 28 days after grafting revealed a broad immune response (including  
458 SA and RNA silencing pathways) in the susceptible cassava 60444 variety that was not found in  
459 susceptible cassava plants after a long-term infection (Maruthi *et al.*, 2014). Our meta-analysis of  
460 different RNA-Seq datasets also showed significant differences in transcriptome responses at  
461 different times after infection. The absence of a detectable immune response in the resistant KBH  
462 2006/18 variety suggests that even earlier time-points after infection should be analysed, preferably  
463 using *Agrobacterium* with infectious CBSV clones or infections of protoplasts followed by  
464 transcriptomics or proteomics. The Pfam-based meta-analysis also identified interesting protein  
465 families, such as meristem identity proteins (NAM and *Apetala2*), which were regulated in different  
466 host-potyvirus interactions and at different time points after infection. Understanding the functions  
467 of these proteins in host-virus interactions might reveal conserved developmental responses to  
468 virus infections across different taxa. Our Pfam-based comparison methodology also makes larger  
469 scale comparison of crop RNA-Seq studies possible, with the aim of developing a more  
470 comprehensive understanding of conserved responses of non-model plants to different biotic and  
471 abiotic stresses.

## 472 **ACKNOWLEDGEMENTS**

473 The authors would like to thank Asuka Kuwabara for assisting with the microscopy, Kamil  
474 Sklodowski for help with the image analysis, and Matthias Hirsch-Hoffman for bioinformatics data

475 management. We also thank Irene Zurkirchen for support in the glasshouse and R. Glen Uhrig for  
476 helpful comments on the manuscript. We gratefully acknowledge the support of our research by  
477 ETH Zurich. Ravi B. Anjanappa was supported by the Research Fellow Partnership Programme of  
478 ETH Global. Devang Mehta is supported by the European Union's Seventh Framework Programme  
479 for research, technological development, and demonstration (EU GA-2013-608422-IDP BRIDGES).

## 480 **SUPPORTING INFORMATION**

481 Fig. S1: Experimental scheme of the study

482 Fig. S2: CBSV quantitation at 3 different time points after grafting

483 Fig. S3: Validation of RNA-seq data by RT-qPCR

484 Fig. S4: Virus read counting from unmapped RNA-seq reads

485 Fig. S5: RT-qPCR based RDR1 expression across the three timepoints

486 Table S1: Primers used in the study

487 Table S2: Significantly differentially expressed genes

488 Table S3: List of denovo assembled transcripts and their differential expression

489 Table S4: Results of gene set enrichment analysis

490 Table S5: Comparison of multiple virus-host RNA-seq datasets

491 Table S6: DEGs in the study that match putative RDR1 targets identified by Cao et al., 2014.

## 492 REFERENCES

- 493 **Allie F, Pierce EJ, Okoniewski MJ, Rey C.** 2014. Transcriptional analysis of South African cassava  
494 mosaic virus-infected susceptible and tolerant landraces of cassava highlights differences in  
495 resistance, basal defense and cell wall associated genes during infection. *BMC Genomics* **15**, 1006.
- 496 **Almagro L, Gómez Ros L V., Belchi-Navarro S, Bru R, Ros Barceló A, Pedreño MA.** 2009. Class III  
497 peroxidases in plant defence reactions. *Journal of Experimental Botany* **60**, 377–390.
- 498 **Amari K, Boutant E, Hofmann C, et al.** 2010. A family of plasmodesmal proteins with receptor-like  
499 properties for plant viral movement proteins. *PLoS Pathogens* **6**, 1–10.
- 500 **Anjanappa RB, Mehta D, Maruthi MN, Kanju E, Gruissem W, Vanderschuren H.** 2016.  
501 Characterization of brown streak virus-resistant cassava. *Molecular Plant-Microbe Interactions* **29**,  
502 527–534.
- 503 **Bigirimana S, Barumbanze P, Ndayihanzamaso P, Shirima R, Legg JP.** 2011. First report of  
504 cassava brown streak disease and associated Ugandan cassava brown streak virus in Burundi. *New*  
505 *Disease Reports* **24**, 26.
- 506 **Brosseau C, Moffett P.** 2015. Functional and Genetic Analysis Identify a Role for Arabidopsis  
507 ARGONAUTE5 in Antiviral RNA Silencing. *The Plant Cell* **27**, 1742–54.
- 508 **Cao M, Du P, Wang X, Yu Y-Q, Qiu Y-H, Li W, Gal-On A, Zhou C, Li Y, Ding S-W.** 2014. Virus  
509 infection triggers widespread silencing of host genes by a distinct class of endogenous siRNAs in  
510 Arabidopsis. *Proceedings of the National Academy of Sciences of the United States of America* **111**,  
511 14613–8.
- 512 **Carbonell A, Fahlgren N, Garcia-Ruiz H, Gilbert KB, Montgomery TA, Nguyen T, Cuperus JT,**  
513 **Carrington JC.** 2012. Functional analysis of three Arabidopsis ARGONAUTES using slicer-defective  
514 mutants. *The Plant Cell* **24**, 3613–29.
- 515 **Catinot J, Buchala A, Abou-Mansour E, Métraux J-P.** 2008. Salicylic acid production in response to

- 516 biotic and abiotic stress depends on isochorismate in *Nicotiana benthamiana*. *FEBS Letters* **582**,  
517 473–478.
- 518 **Chen Z, Zheng Z, Huang J, Lai Z, Fan B.** 2009. Biosynthesis of salicylic acid in plants. *Plant*  
519 *Signaling & Behavior* **4**, 493–496.
- 520 **Dobin A, Davis CA, Schlesinger F, Drenkow J, Zaleski C, Jha S, Batut P, Chaisson M, Gingeras**  
521 **TR.** 2013. STAR: Ultrafast universal RNA-seq aligner. *Bioinformatics* **29**, 15–21.
- 522 **Finn RD, Coggill P, Eberhardt RY, et al.** 2015. The Pfam protein families database: towards a more  
523 sustainable future. *Nucleic Acids Research* **44**, D279–D285.
- 524 **Garcia-Ruiz H, Takeda A, Chapman EJ, Sullivan CM, Fahlgren N, Brempelis KJ, Carrington JC.**  
525 2010. Arabidopsis RNA-dependent RNA polymerases and dicer-like proteins in antiviral defense and  
526 small interfering RNA biogenesis during Turnip Mosaic Virus infection. *The Plant Cell* **22**, 481–96.
- 527 **Göhre V, Jones AME, Sklenář J, Robatzek S, Weber APM.** 2012. Molecular Crosstalk Between  
528 PAMP-Triggered Immunity and Photosynthesis. *Molecular Plant-Microbe Interactions* **25**, 1083–  
529 1092.
- 530 **Goyer A, Hamlin L, Crosslin JM, Buchanan A, Chang JH.** 2015. RNA-Seq analysis of resistant and  
531 susceptible potato varieties during the early stages of potato virus Y infection. *BMC Genomics* **16**,  
532 472.
- 533 **Grabherr MG, Haas BJ, Yassour M, et al.** 2011. Full-length transcriptome assembly from RNA-Seq  
534 data without a reference genome. *Nature Biotechnology* **29**, 644–52.
- 535 **Guenoune-Gelbart D, Elbaum M, Sagi G, Levy A, Epel BL.** 2008. Tobacco mosaic virus (TMV)  
536 replicase and movement protein function synergistically in facilitating TMV spread by lateral  
537 diffusion in the plasmodesmal desmotubule of *Nicotiana benthamiana*. *Molecular Plant-Microbe*  
538 *Interactions* **21**, 335–45.
- 539 **Hillocks RJ, Raya MD, Mtunda K, Kiozia H.** 2001. Effects of brown streak virus disease on yield and

- 540 quality of cassava in Tanzania. *Journal of Phytopathology* **149**, 389–394.
- 541 **Huang J, Gu M, Lai Z, Fan B, Shi K, Zhou Y-H, Yu J-Q, Chen Z.** 2010. Functional analysis of the  
542 Arabidopsis PAL gene family in plant growth, development, and response to environmental stress.  
543 *Plant Physiology* **153**, 1526–1538.
- 544 **Hunter LJR, Westwood JH, Heath G, Macaulay K, Smith AG, Macfarlane S a, Palukaitis P, Carr**  
545 **JP.** 2013. Regulation of RNA-dependent RNA polymerase 1 and isochorismate synthase gene  
546 expression in Arabidopsis. *PLoS ONE* **8**, e66530.
- 547 **Iglesias VA, Meins Jr F.** 2000. Movement of plant viruses is delayed in a b-1,3-glucanase-deficient  
548 mutant showing a reduced plasmodesmatal size exclusion limit and enhanced callose deposition.  
549 *The Plant Journal* **21**, 157–166.
- 550 **Jaubert M, Bhattacharjee S, Mello AFS, Perry KL, Moffett P.** 2011. ARGONAUTE2 mediates RNA-  
551 silencing antiviral defenses against Potato virus X in Arabidopsis. *Plant Physiology* **156**, 1556–64.
- 552 **Jovel J, Walker M, Sanfaçon H.** 2011. Salicylic acid-dependent restriction of Tomato ringspot virus  
553 spread in tobacco is accompanied by a hypersensitive response, local RNA silencing, and moderate  
554 systemic resistance. *Molecular Plant-Microbe Interactions* **24**, 706–718.
- 555 **Kaweesi T, Kawuki R, Kyaligonza V, Baguma Y, Tusiime G, Ferguson ME.** 2014. Field evaluation  
556 of selected cassava genotypes for cassava brown streak disease based on symptom expression and  
557 virus load. *Virology Journal* **11**, 216.
- 558 **Kim HG, Kwon SJ, Jang YJ, Nam MH, Chung JH, Na Y-C, Guo H, Park OK.** 2013. *GDSL Lipase 1*  
559 *modulates plant immunity through feedback regulation of ethylene signaling.*
- 560 **Kwon SJ, Jin HC, Lee S, Nam MH, Chung JH, Kwon S II, Ryu CM, Park OK.** 2009. GDSL lipase-like  
561 1 regulates systemic resistance associated with ethylene signaling in Arabidopsis. *The Plant Journal*  
562 **58**, 235–245.
- 563 **Lee W-S, Fu S-F, Li Z, Murphy AM, Dobson EA, Garland L, Chaluvadi SR, Lewsey MG, Nelson**

- 564 **RS, Carr JP.** 2016. Salicylic acid treatment and expression of an RNA-dependent RNA polymerase 1  
565 transgene inhibit lethal symptoms and meristem invasion during tobacco mosaic virus infection in  
566 *Nicotiana benthamiana*. *BMC Plant Biology* **16**, 15.
- 567 **Legg JP, Jeremiah SC, Obiero HM, et al.** 2011. Comparing the regional epidemiology of the  
568 cassava mosaic and cassava brown streak virus pandemics in Africa. *Virus Research* **159**, 161–170.
- 569 **Lewsey MG, Murphy AM, Maclean D, et al.** 2010. Disruption of two defensive signaling pathways  
570 by a viral RNA silencing suppressor. *Molecular Plant-Microbe Interactions* **23**, 835–45.
- 571 **Li J, Brader G, Palva ET.** 2004. The WRKY70 Transcription Factor: A Node of Convergence for  
572 Jasmonate-Mediated and Salicylate-Mediated Signals in Plant Defense. *The Plant Cell* **16**, 319–331.
- 573 **Luo W, Brouwer C.** 2013. Pathview: An R/Bioconductor package for pathway-based data integration  
574 and visualization. *Bioinformatics* **29**, 1830–1831.
- 575 **Maeda H, Song W, Sage T, Dellapenna D.** 2014. Role of callose synthases in transfer cell wall  
576 development in tocopherol deficient *Arabidopsis* mutants. *Frontiers in Plant Science* **5**, 46.
- 577 **Malinovsky FG, Fangel JU, Willats WGT.** 2014. The role of the cell wall in plant immunity. *Frontiers*  
578 *in Plant Science* **5**, 178.
- 579 **Maruthi MN, Bouvaine S, Tufan HA, Mohammed IU, Hillocks RJ.** 2014. Transcriptional Response  
580 of Virus-Infected Cassava and Identification of Putative Sources of Resistance for Cassava Brown  
581 Streak Disease. *PLoS ONE* **9**, e96642.
- 582 **Maruthi MN, Hillocks RJ, Mtunda K, Raya MD, Muhanna M, Kiozia H, Rekha AR, Colvin J,**  
583 **Thresh JM.** 2005. Transmission of Cassava brown streak virus by *Bemisia tabaci* (Gennadius).  
584 *Journal of Phytopathology* **153**, 307–312.
- 585 **Mbanzibwa DR, Tian YP, Tugume a K, et al.** 2011. Evolution of cassava brown streak disease-  
586 associated viruses. *The Journal of General Virology* **92**, 974–87.
- 587 **Mbanzibwa DR, Tian YP, Tugume AK, Mukasa SB, Tairo F, Kyamanywa S, Kullaya A, Valkonen**



- 588 **JPT.** 2009. Genetically distinct strains of Cassava brown streak virus in the Lake Victoria basin and  
589 the Indian Ocean coastal area of East Africa. *Archives of Virology* **154**, 353–359.
- 590 **Miedes E, Vanholme R, Boerjan W, Molina A.** 2014. The role of the secondary cell wall in plant  
591 resistance to pathogens. *Frontiers in Plant Science* **5**, 358.
- 592 **Mohammed IU, Abarshi MM, Muli B, Hillocks RJ, Maruthi MN.** 2012. The symptom and genetic  
593 diversity of cassava brown streak viruses infecting cassava in East Africa. *Advances in Virology* **2012**,  
594 1–10.
- 595 **Monger WA, Seal S, Cotton S, Foster GD.** 2001. Identification of different isolates of Cassava  
596 brown streak virus and development of a diagnostic test. *Plant Pathology* **50**, 768–775.
- 597 **Moreno I, GUISSEM W, Vanderschuren H.** 2011. Reference genes for reliable potyvirus quantitation  
598 in cassava and analysis of Cassava brown streak virus load in host varieties. *Journal of Virological*  
599 *Methods* **177**, 49–54.
- 600 **Mulimbi W, Phemba X, Assumani B.** 2012. First report of Ugandan cassava brown streak virus on  
601 cassava in Democratic Republic of Congo. *New Disease Reports* **26**, 11.
- 602 **Ogwok E, Alicai T, Rey MEC, Beyene G, Taylor NJ.** 2015. Distribution and accumulation of cassava  
603 brown streak viruses within infected cassava (*Manihot esculenta*) plants. *Plant Pathology* **64**, 1235–  
604 1246.
- 605 **Parent JS, Bouteiller N, Elmayan T, Vaucheret H.** 2015. Respective contributions of Arabidopsis  
606 DCL2 and DCL4 to RNA silencing. *The Plant Journal* **81**, 223–232.
- 607 **Pumplin N, Voinnet O.** 2013. RNA silencing suppression by plant pathogens: defence, counter-  
608 defence and counter-counter-defence. *Nature Reviews Microbiology* **11**, 745–60.
- 609 **Rakhshandehroo F, Takeshita M, Squires J, Palukaitis P.** 2009. The influence of RNA-dependent  
610 RNA polymerase 1 on potato virus Y infection and on other antiviral response genes. *Molecular*  
611 *Plant-Microbe Interactions* **22**, 1312–1318.

- 612 **Ramada MH., Lopes FA., Ulhoa CJ, Silva R dN.** . 2010. Optimized microplate  $\beta$ -1,3-glucanase  
613 assay system for *Trichoderma* spp. screening. *Journal of Microbiological Methods* **81**, 6–10.
- 614 **Rodrigo G, Carrera J, Ruiz-Ferrer V, del Toro FJ, Llave C, Voinnet O, Elena SF.** 2012. A meta-  
615 analysis reveals the commonalities and differences in *Arabidopsis thaliana* response to different viral  
616 pathogens. *PLoS ONE* **7**.
- 617 **Rubio M, Ballester AR, Olivares PM, De Moura MC, Dicenta F, Martínez-Gómez P.** 2015a. Gene  
618 expression analysis of plum pox virus (Sharka) susceptibility/resistance in apricot (*Prunus armeniaca*  
619 L.). *PLoS ONE* **10**, 1–16.
- 620 **Rubio M, Rodríguez-Moreno L, Ballester AR, de Moura MC, Bonghi C, Candresse T, Martínez-**  
621 **Gómez P.** 2015b. Analysis of gene expression changes in peach leaves in response to Plum pox virus  
622 infection using RNA-Seq. *Molecular Plant Pathology* **16**, 164–176.
- 623 **Scholthof HB, Alvarado VY, Vega-Arreguin JC, Ciomperlik J, Odokonyero D, Brosseau C,**  
624 **Jaubert M, Zamora A, Moffett P.** 2011. Identification of an ARGONAUTE for antiviral RNA silencing  
625 in *Nicotiana benthamiana*. *Plant Physiology* **156**, 1548–1555.
- 626 **Shi B, Lin L, Wang S, et al.** 2015. Identification and regulation of host genes related to Rice stripe  
627 virus symptom production. *New Phytologist* **209**, 1106–1119.
- 628 **Supek F, Bosnjak M, Skunca N, Smuc T.** 2011. Revigo summarizes and visualizes long lists of gene  
629 ontology terms. *PLoS ONE* **6**.
- 630 **de Torres Zabala M, Littlejohn G, Jayaraman S, et al.** 2015. Chloroplasts play a central role in plant  
631 defence and are targeted by pathogen effectors. *Nature Plants* **1**, 15074.
- 632 **Ueki S, Spektor R, Natale DM, Citovsky V.** 2010. ANK, a host cytoplasmic receptor for the Tobacco  
633 mosaic virus cell-to-cell movement protein, facilitates intercellular transport through  
634 plasmodesmata. *PLoS Pathogens* **6**.
- 635 **Ülker B, Shahid Mukhtar M, Somssich IE.** 2007. The WRKY70 transcription factor of *Arabidopsis*

- 636 influences both the plant senescence and defense signaling pathways. *Planta* **226**, 125–137.
- 637 **Vanderschuren H, Moreno I, Anjanappa RB, Zainuddin IM, GUISSEM W.** 2012. Exploiting the  
638 combination of natural and genetically engineered resistance to cassava mosaic and cassava brown  
639 streak viruses impacting cassava production in Africa. *PLoS ONE* **7**, e45277.
- 640 **Vanholme R, Demedts B, Morreel K, Ralph J, Boerjan W.** 2010. Lignin biosynthesis and structure.  
641 *Plant Physiology* **153**, 895–905.
- 642 **Vlot AC, Dempsey DA, Klessig DF.** 2009. Salicylic Acid, a Multifaceted Hormone to Combat  
643 Disease. *Annual Review of Phytopathology* **47**, 177–206.
- 644 **Wagaba H, Beyene G, Trembley C, Alicai T, Fauquet CM, Taylor NJ.** 2013. Efficient transmission  
645 of cassava brown streak disease viral pathogens by chip bud grafting. *BMC Research Notes* **6**, 516.
- 646 **Wang M-B, Masuta C, Smith N a., Shimura H.** 2012. RNA Silencing and Plant Viral Diseases.  
647 *Molecular Plant-Microbe Interactions* **25**, 1275–1285.
- 648 **Wang X-B, Wu Q, Ito T, Cillo F, Li W-X, Chen X, Yu J-L, Ding S-W.** 2010. RNAi-mediated viral  
649 immunity requires amplification of virus-derived siRNAs in *Arabidopsis thaliana*. *Proceedings of the*  
650 *National Academy of Sciences of the United States of America* **107**, 484–489.
- 651 **Waterhouse PM, Fusaro AF.** 2006. Viruses face a double defense by plant small RNAs. *Science* **313**,  
652 54–55.
- 653 **Whitham SA, Yang C, Goodin MM.** 2006. Global impact: elucidating plant responses to viral  
654 infection. *Molecular Plant-Microbe Interactions* **19**, 1207–1215.
- 655 **Widhalm JR, Dudareva N.** 2015. A familiar ring to it: Biosynthesis of plant benzoic acids. *Molecular*  
656 *Plant* **8**, 83–97.
- 657 **Winter S, Koerbler M, Stein B, Pietruszka A, Paape M, Butgereitt A.** 2010. Analysis of cassava  
658 brown streak viruses reveals the presence of distinct virus species causing cassava brown streak  
659 disease in East Africa. *Journal of General Virology* **91**, 1365–1372.

660 **Yi X, Du Z, Su Z.** 2013. PlantGSEA: a gene set enrichment analysis toolkit for plant community.

661 *Nucleic Acids Research* **41**, 98–103.

662 **Ying X-B, Dong L, Zhu H, Duan C-G, Du Q-S, Lv D-Q, Fang Y-Y, Garcia JA, Fang R-X, Guo H-S.**

663 2010. RNA-dependent RNA polymerase 1 from *Nicotiana tabacum* suppresses RNA silencing and

664 enhances viral infection in *Nicotiana benthamiana*. *The Plant Cell* **22**, 1358–72.

665 **Zavaliev R, Epel BL.** 2015. Imaging callose at plasmodesmata using aniline blue: quantitative

666 confocal microscopy. In: Heinlein M, ed. *Plasmodesmata: Methods and Protocols, Methods in*

667 *Molecular Biology*. New York: Springer Science+Business Media, 105–119.

668 **Zheng XY, Spivey NW, Zeng W, Liu PP, Fu ZQ, Klessig DF, He SY, Dong X.** 2012. Coronatine

669 promotes *Pseudomonas syringae* virulence in plants by activating a signaling cascade that inhibits

670 salicylic acid accumulation. *Cell Host & Microbe* **11**, 587–596.

671 Fig. Legends

672 **Fig. 1:** Gene regulation in susceptible (60444) and resistant (KBH 2006/18) cassava varieties at 28

673 dag and mixed CBSV and UCBSV infection. **a.** Fold change of differentially expressed genes (DEGs)

674 (FDR<0.05, fold change  $\geq 2$ ) in both varieties. Fold change of DEGs in 60444 from the X-coordinate

675 and in KBH 2006/18 from the Y-coordinate. **b.** Functional characterization of DEGs based on gene

676 ontology (GO) of biological processes. Significantly enriched GO categories in 60444 and KBH

677 2006/18 were first reduced based on semantic similarity (REVIGO; [revigo.irb.hr](http://revigo.irb.hr)) and then plotted.

678 Blue circles represent GO categories enriched in 60444 and orange circles those in KBH 2006/18;

679 overlapping blue and orange circles represent GO categories enriched in both 60444 and KBH

680 2006/18. Circles for the top 10 significantly enriched categories are shaded. **c.** Proportion of nuclear-

681 encoded chloroplast genes (NECGs) differentially regulated after infection. 6% of the cassava

682 genome consists of NECGs while 16% of the 60444 and 20% of the KBH 2006/18 DEGs after

683 infection are NECGs.

684 **Fig. 2:** Regulation of callose deposition at plasmodesmata in susceptible (60444) and resistant (KBH  
685 2006/18) cassava varieties after CBSV-infection. **a.** Schematic depiction of a plasmodesmata used by  
686 viruses for intercellular movement. Also shown are genes encoding key enzymes significantly  
687 regulated after infection (*BG3*: *GLUCANASE*, encoding a callose-degrading  $\beta$ -1,3-glucanase; *GSL4*:  
688 *GLUCAN SYNTHASE-LIKE 4*, encoding a callose synthesis enzyme; *PDLP1*: *PLASMODEMATA-*  
689 *LOCATED PROTEIN 1*, encoding a protein involved in virus movement across the plasmodesmata  
690 and in callose synthesis; *ANKs*: *ANKYRIN REPEAT FAMILY PROTEINS*, encoding proteins that are  
691 negative regulators of callose deposition) with their fold-changes based on RNA-Seq analysis at 28  
692 dag. **b. (upper panel)** RT-qPCR analysis of *BG3* mRNA at 60 dag. 60444 leaves were symptomatic for  
693 virus infection at this time-point. **(lower panel)** *BG3* enzymatic activity also significantly increases  
694 after infection in 60444 and is unchanged in KBH 2006/18 at 60 dag. **c.** Aniline blue staining for  
695 detection of callose deposits. Leaf samples from 60444 were stained and visualized using a confocal  
696 laser scanning microscope at 400X magnification. Callose deposits are visible as small bright dots  
697 along the cell walls (white arrowheads). **d. (upper panel)** Quantitation of callose deposits at  
698 plasmodesmata in 60444 and KBH 2006/18 at 60 dag, observed after aniline blue staining and  
699 microscopy. Infection results in a decrease in the amount of callose deposited at the plasmodesmata  
700 in 60444 and an increase in KBH 2006/18. **(lower panel)** The number of callose deposits found in  
701 microscopic images. Infection also decreases in the number of callose deposits in 60444. (\*,  $P < 0.05$ ;  
702 \*\*,  $P < 0.01$ , Un-paired t-test.)

703 **Fig. 3:** Regulation of genes encoding proteins of the salicylic acid synthesis and signalling and the  
704 lignin synthesis pathways in cassava after virus infection. Significantly regulated genes are depicted  
705 together with their mRNA fold-change based on RNA-Seq analysis in susceptible (60444) and  
706 resistant (KBH 2006/18) cassava varieties after infection. *PFK3*: *PHOSPHOFRUCTOKINASE 3*; *SK1*:  
707 *SHIKIMATE KINASE 1*; *ADT1*, *ADT6*: *AROGENATE DEHYDRATASE 1 & 6*; *PAL1*, *PAL2*:  
708 *PHENYLALANINE AMMONIA-LYASE 1 & 2*; *C4H*: *CINNAMATE-4-HYDROXYLASE*; *4CL1*, *4CL2*, *4CL3*:  
709 *4-COUMARATE-CoA LIGASE 1, 2 & 3*; *HCT*: *HYDROXYCINNAMOYL-CoA SHIKIMATE/QUINATE*

710 *HYDROXYCINNAMOYL TRANSFERASE*; *CCR*: *CINNAMOYL COA REDUCTASE 1*; *CAD*: *CINNAMOYL*  
711 *ALCOHOL DEHYDROGENASE*; *NPR1*: *NON-EXPRESSOR OF PR GENES 1*; *NIMIN1*, *NIMIN2*, *NIMIN3*:  
712 *NIM1-INTERACTING*; *TGA9*: *TGACG MOTIF-BINDING PROTEIN 9*; *WRKY70*: *WRKY DNA-BINDING*  
713 *PROTEIN 70*; *SAG12*: *SENESCENCE-ASSOCIATED GENE 12*.

714 **Fig. 4:** Schematic depiction of the antiviral RNA silencing pathway with DEGs encoding proteins that  
715 function in antiviral defence. Genes significantly regulated in variety 60444 after inoculation are  
716 shown together with their mRNA fold-change based on RNA-Seq analysis. These genes were not  
717 regulated in variety KBH 18/2006. *DCL2*: *DICER-LIKE 2*, *AGO5*: *ARGONAUTE 5*, *AGO2*: *ARGONAUTE*  
718 *2*, *RDR1*: *RNA DEPENDENT RNA POLYMERASE 1*, *SGS3*: *SUPPRESSOR OF GENE SILENCING 3*, *SDE5*:  
719 *SILENCING DEFECTIVE 5*.

720 **Fig. 5:** Comparison of transcriptome changes in different virus-host systems. We compared our  
721 RNA-Seq of CBSV-infected cassava with three other poty virus-plant transcriptome studies (late-  
722 stage cassava-CBSV infection, Maruthi et al., 2014; early-stage peach and late-stage apricot  
723 infection with Plum Pox Virus, Rubio et al., 2015a,b). In addition, we included a RNA-Seq study of  
724 cassava infected with South African Cassava Mosaic virus, a ssDNA geminivirus pathosystem (Allie  
725 et al., 2014), to compare the response of cassava to two different virus types. **a.** Pairwise similarity  
726 matrix of numbers of DEGs in each pathosystem, based on comparison of Pfam identifiers  
727 associated with each gene. A pairwise percentage similarity score was computed by multiplying the  
728 DEGs in one pathosystem with 200 and then dividing this number by the sum of the DEGs in both  
729 pathosystems that were compared. **b.** and **c.** Venn diagrams were constructed using the Pfam  
730 identifiers associated with DEGs from all five studies. The Fig. shows specific Pfam identifiers  
731 common to all five studies as well as those common to all potyvirus studies. **b.** Up-regulated DEGs.  
732 **c.** Down-regulated DEGs.

733 **Fig. S1:** Experimental scheme for the study. **a.** Schematic representation of the workflow for RNA-  
734 seq study. **b.** Workflow for callose quantitation, enzymatic assay and expression analysis for  $\beta$  1,3  
735 Glucanase.

736 **Fig. S2:** CBSV quantitation at 3 different time points after grafting. RT-qPCR quantitation of virus  
737 titre ( $\log_2$  fold change relative to reference gene mePP2A) from individual leaves from 3  
738 independent biological replicates at three different time points after grafting.

739 **Fig. S3:** Validation of RNA-seq data by RT-qPCR. RT-qPCR for four genes was performed on the  
740 same samples that were used for RNA-seq analysis.

741 **Fig. S4:** Virus read counting from unmapped RNA-seq reads. Unmapped reads from each sample  
742 sent for RNA-seq were mapped to the two *de novo* assembled virus genomes. **a.** Read distribution  
743 across virus genomes for 60444 samples. **b.** Read counts for all samples in the compatible (60444)  
744 and incompatible (KBH 2006/18) virus-host interaction.

745 **Fig. S5:** RT-qPCR based RDR1 transcript expression across the three time points.



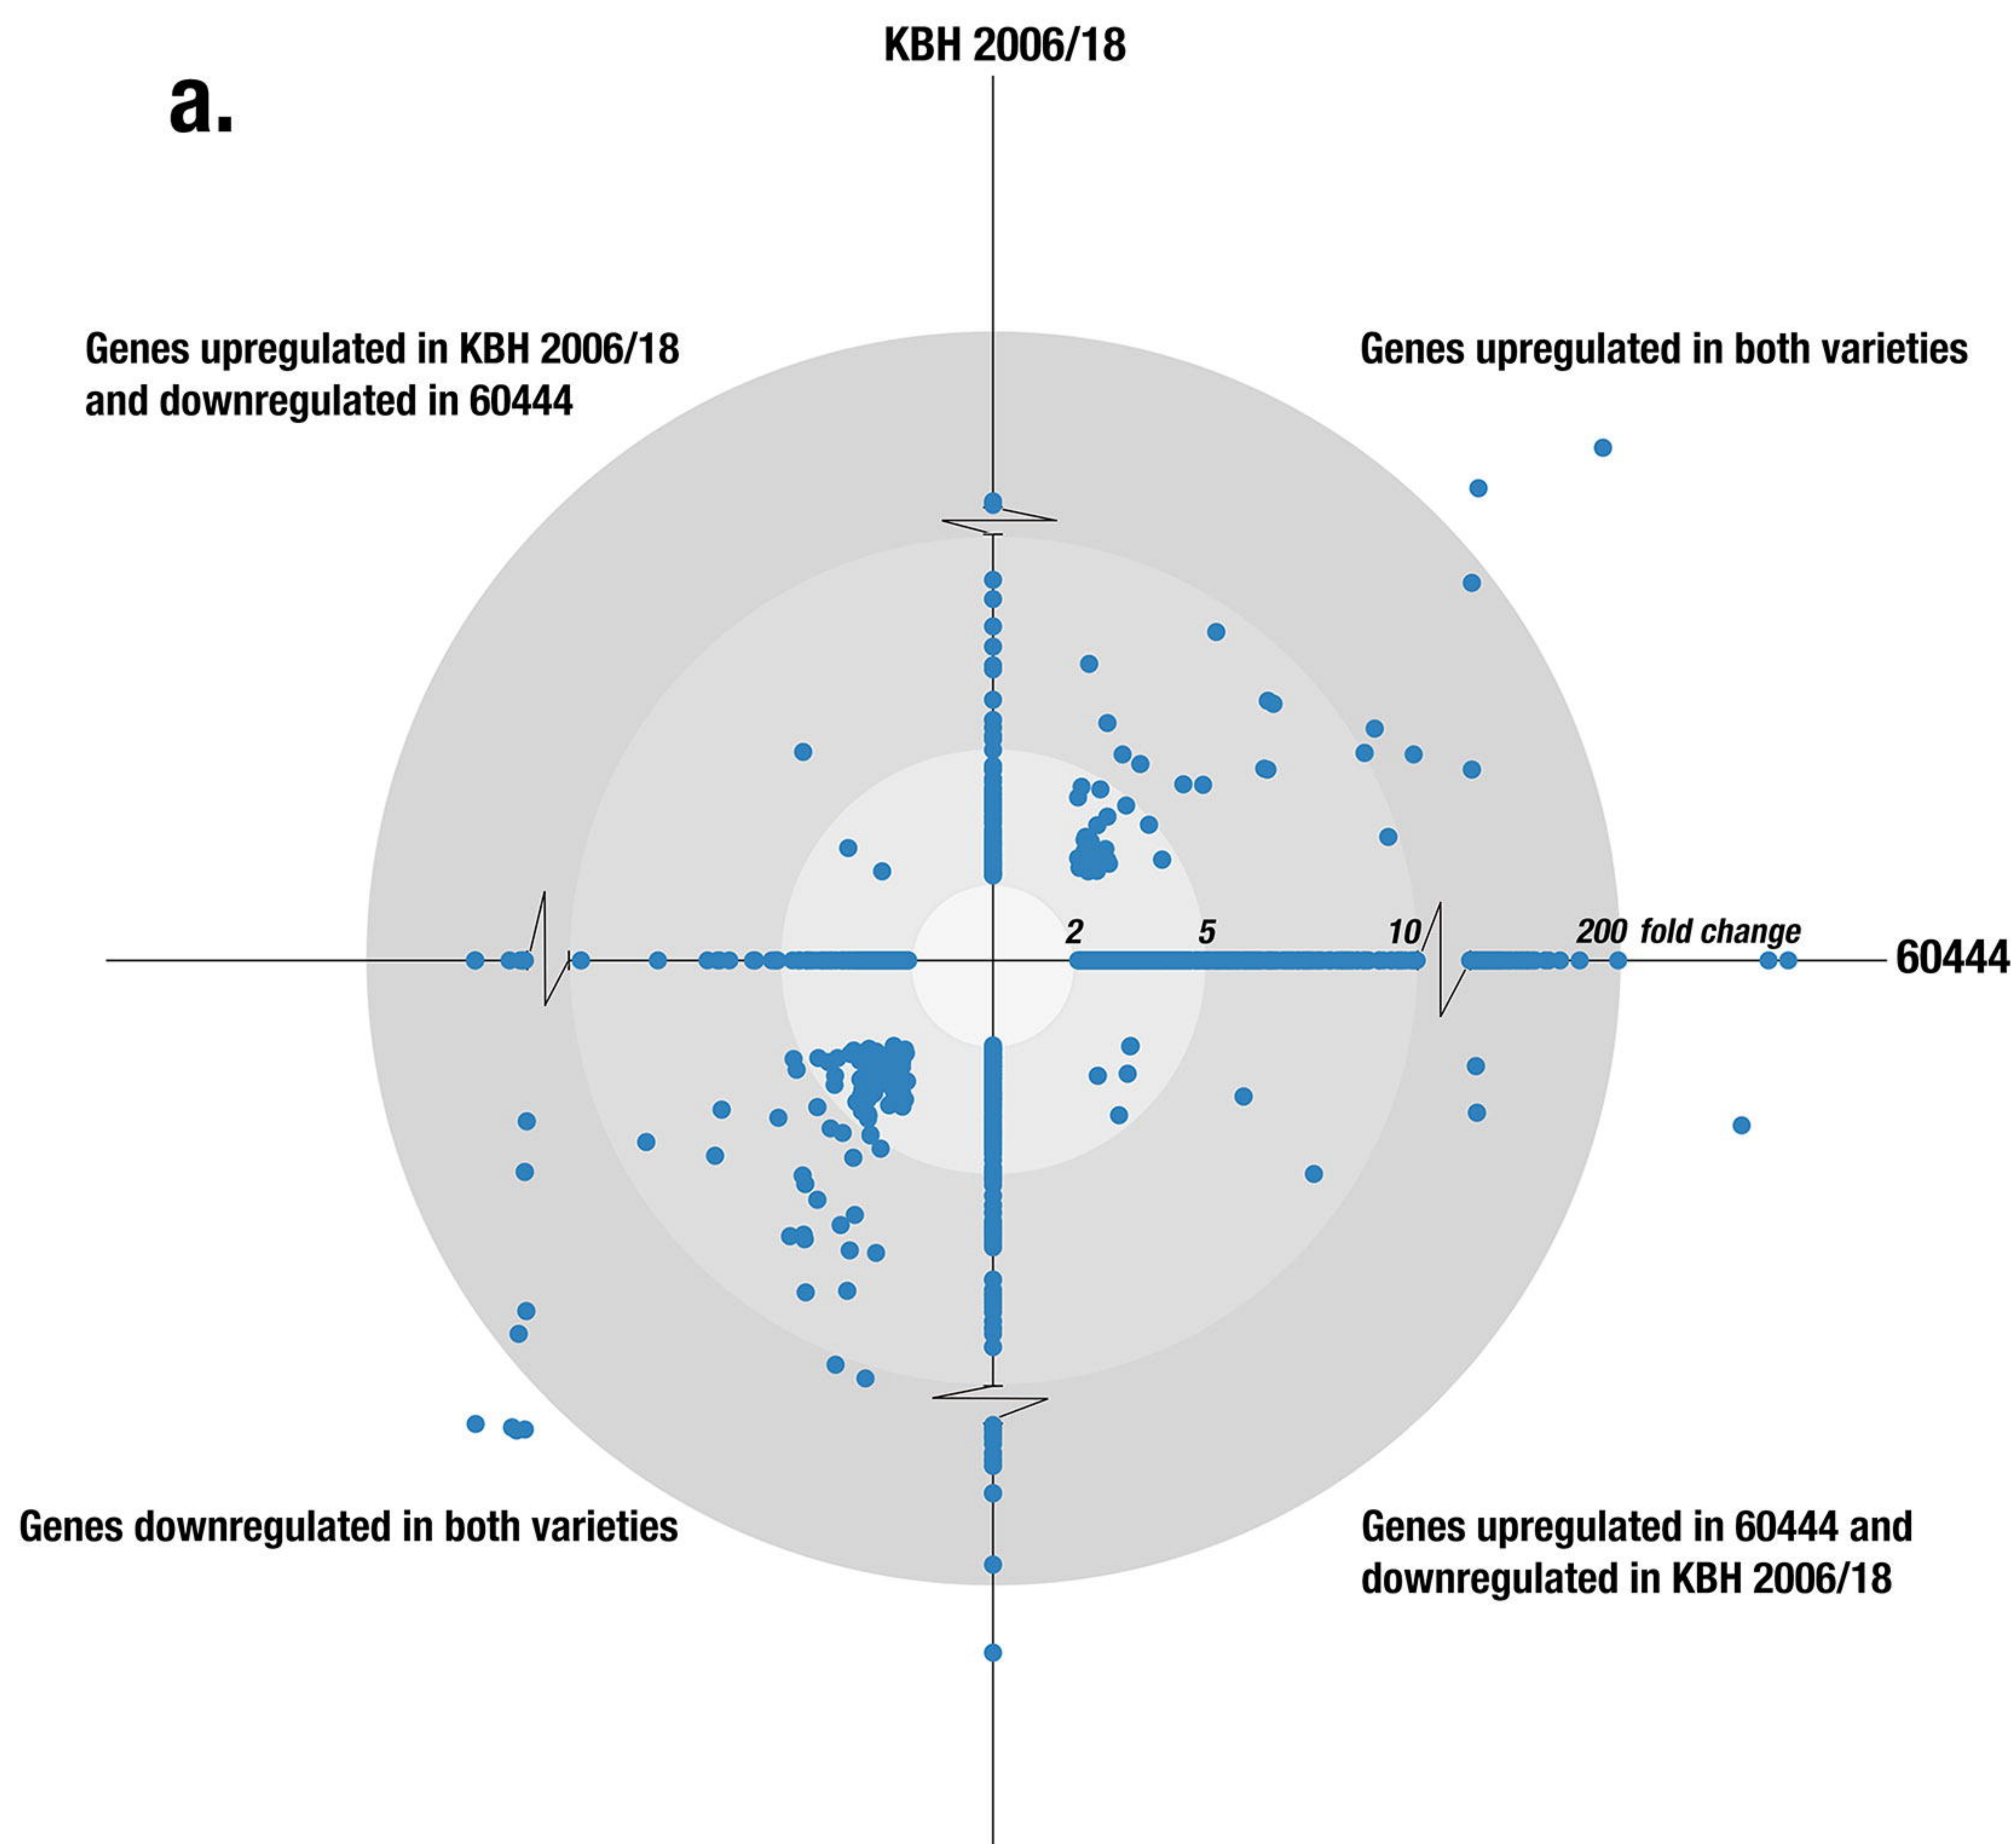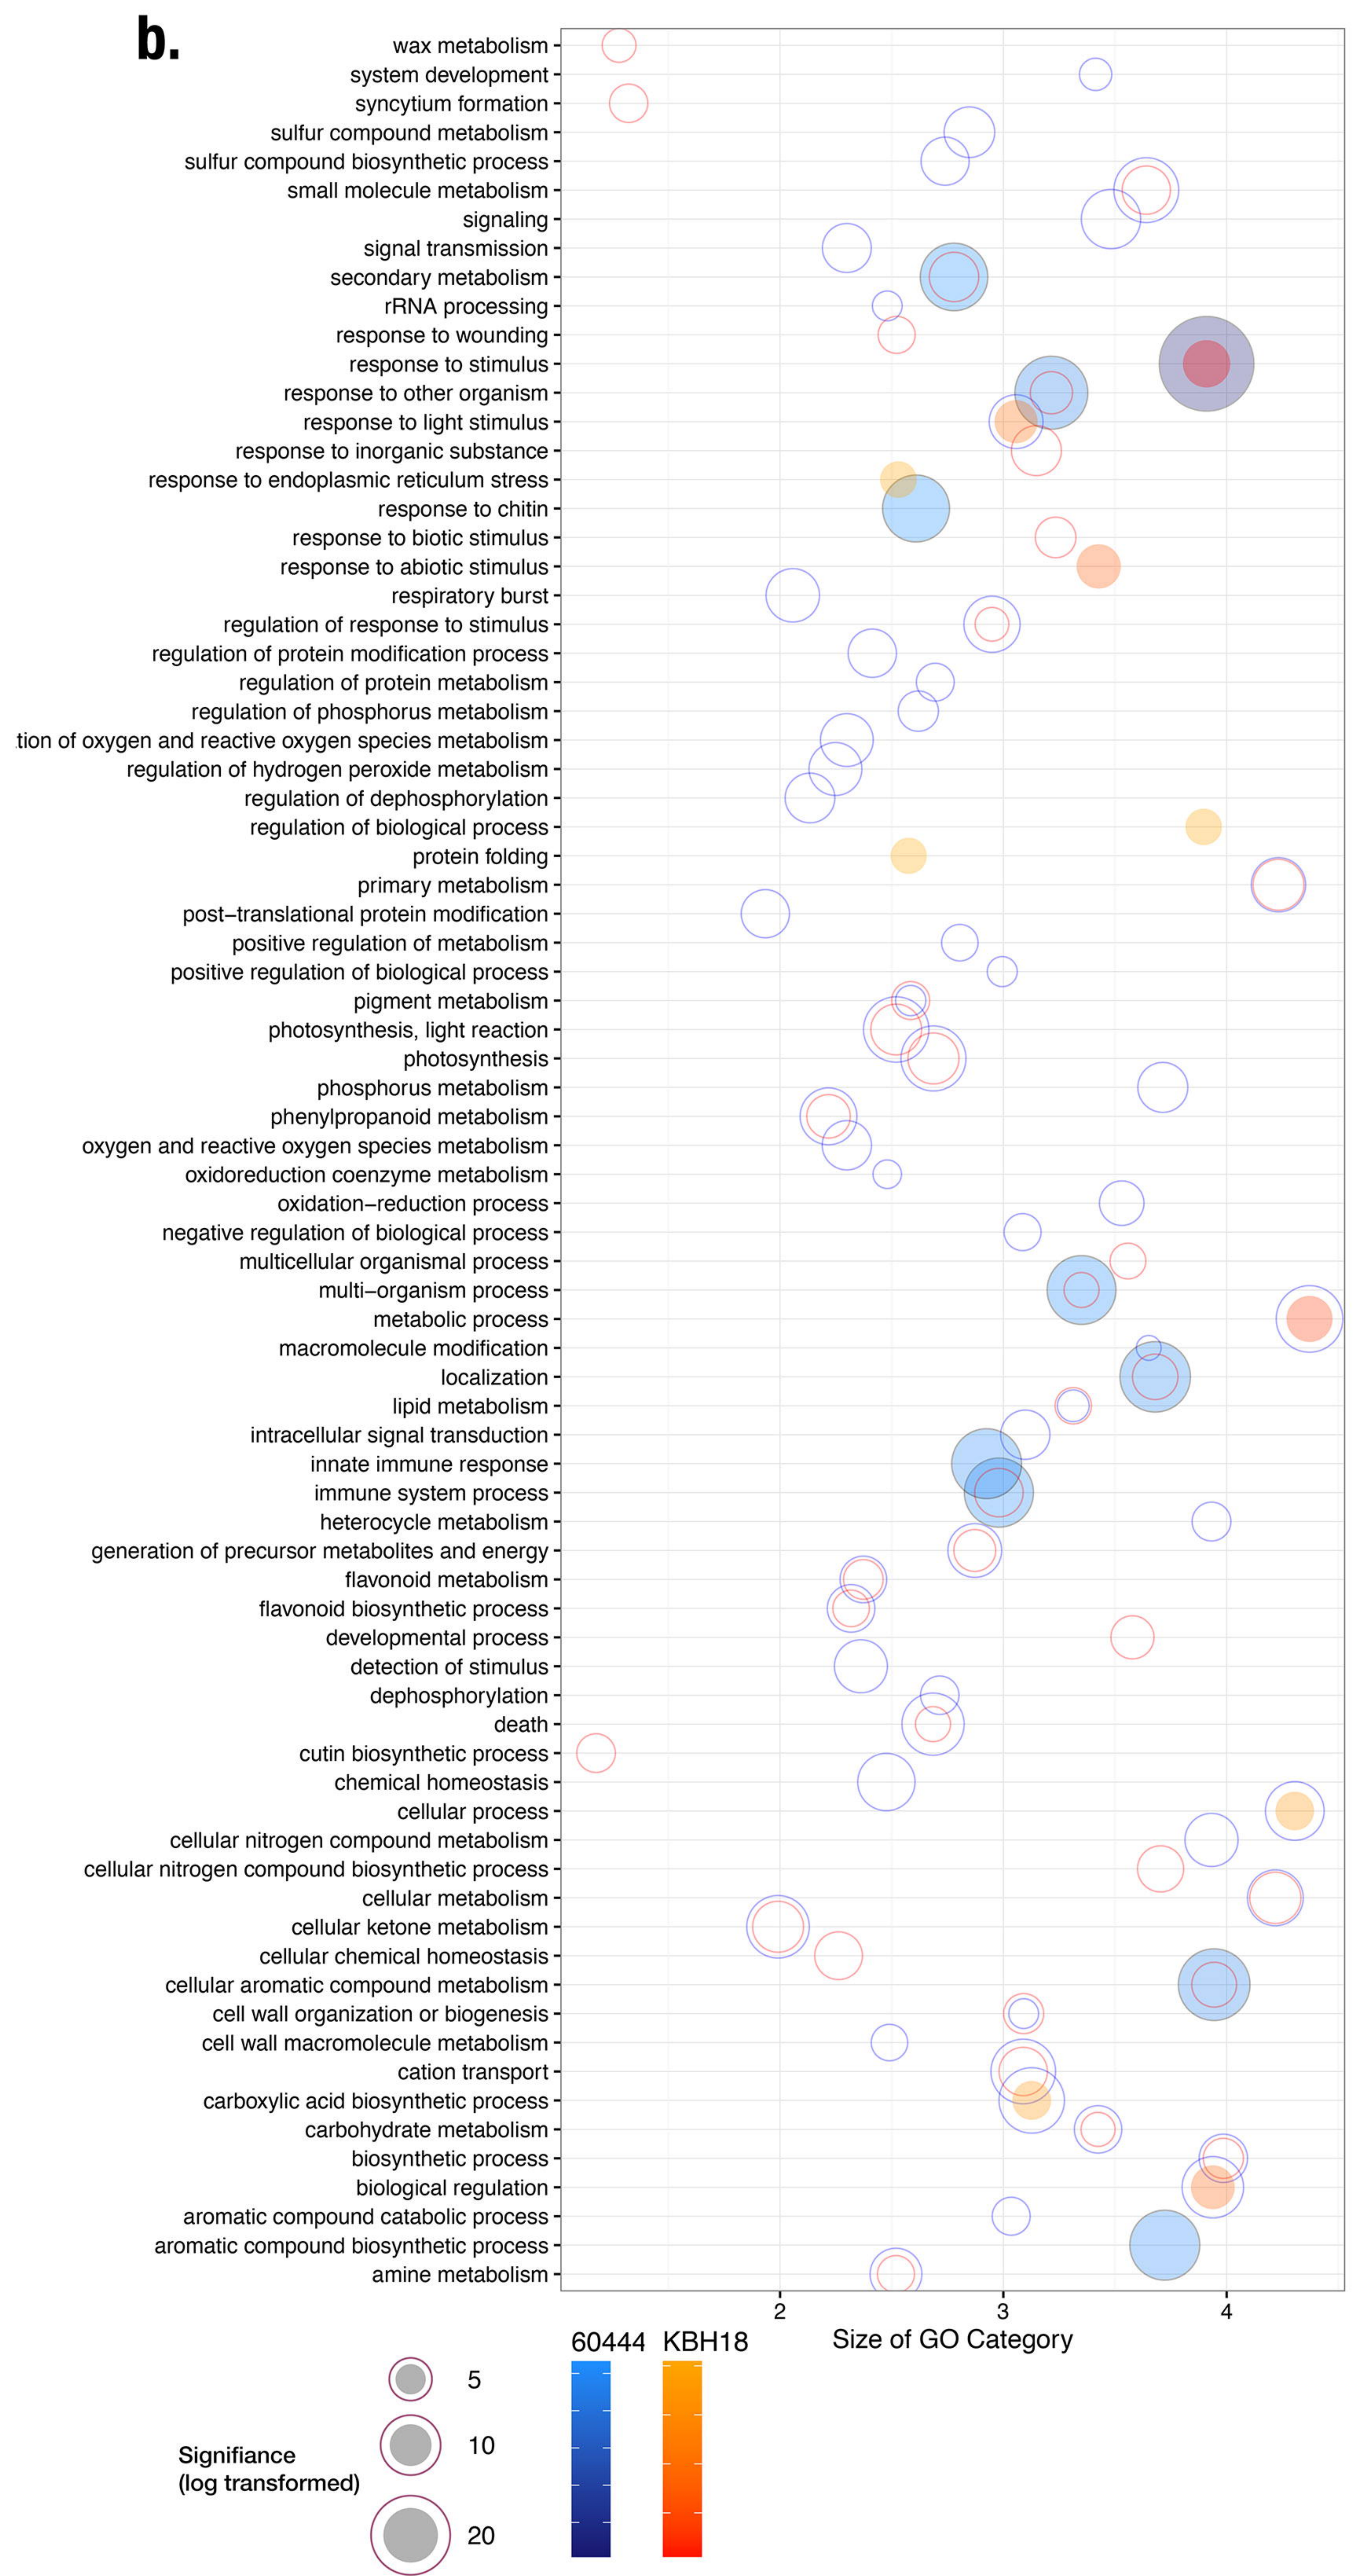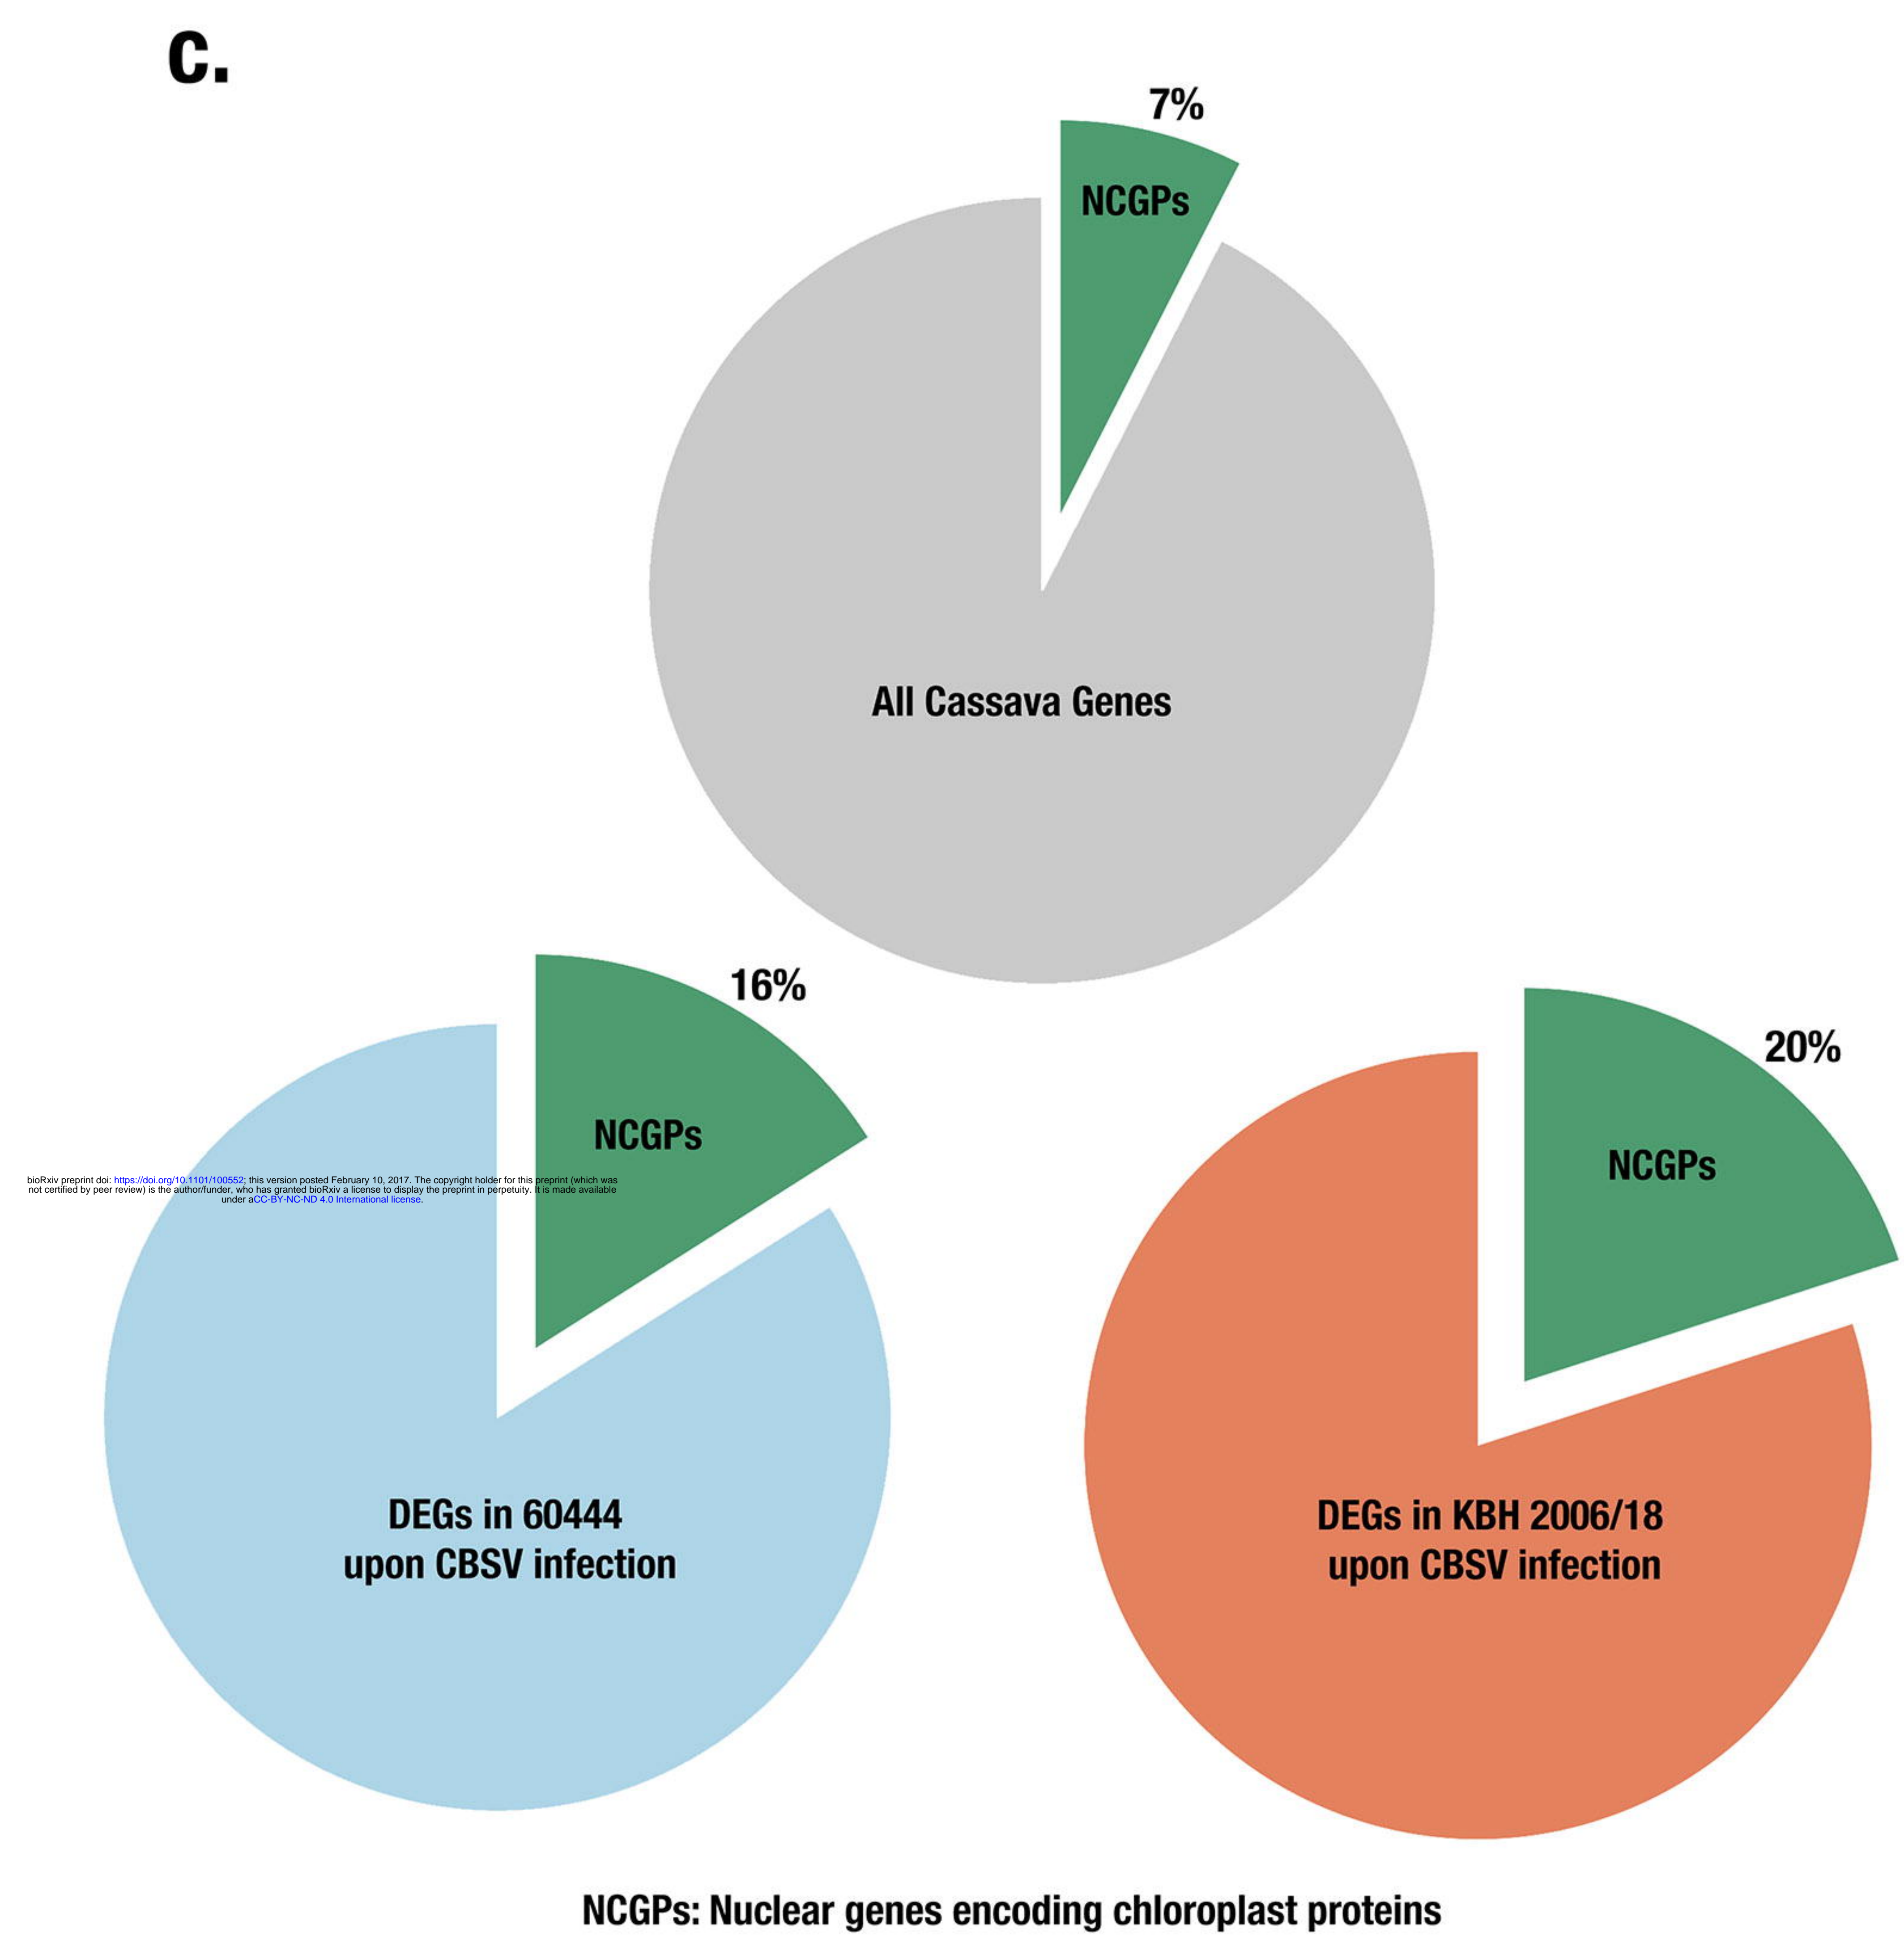



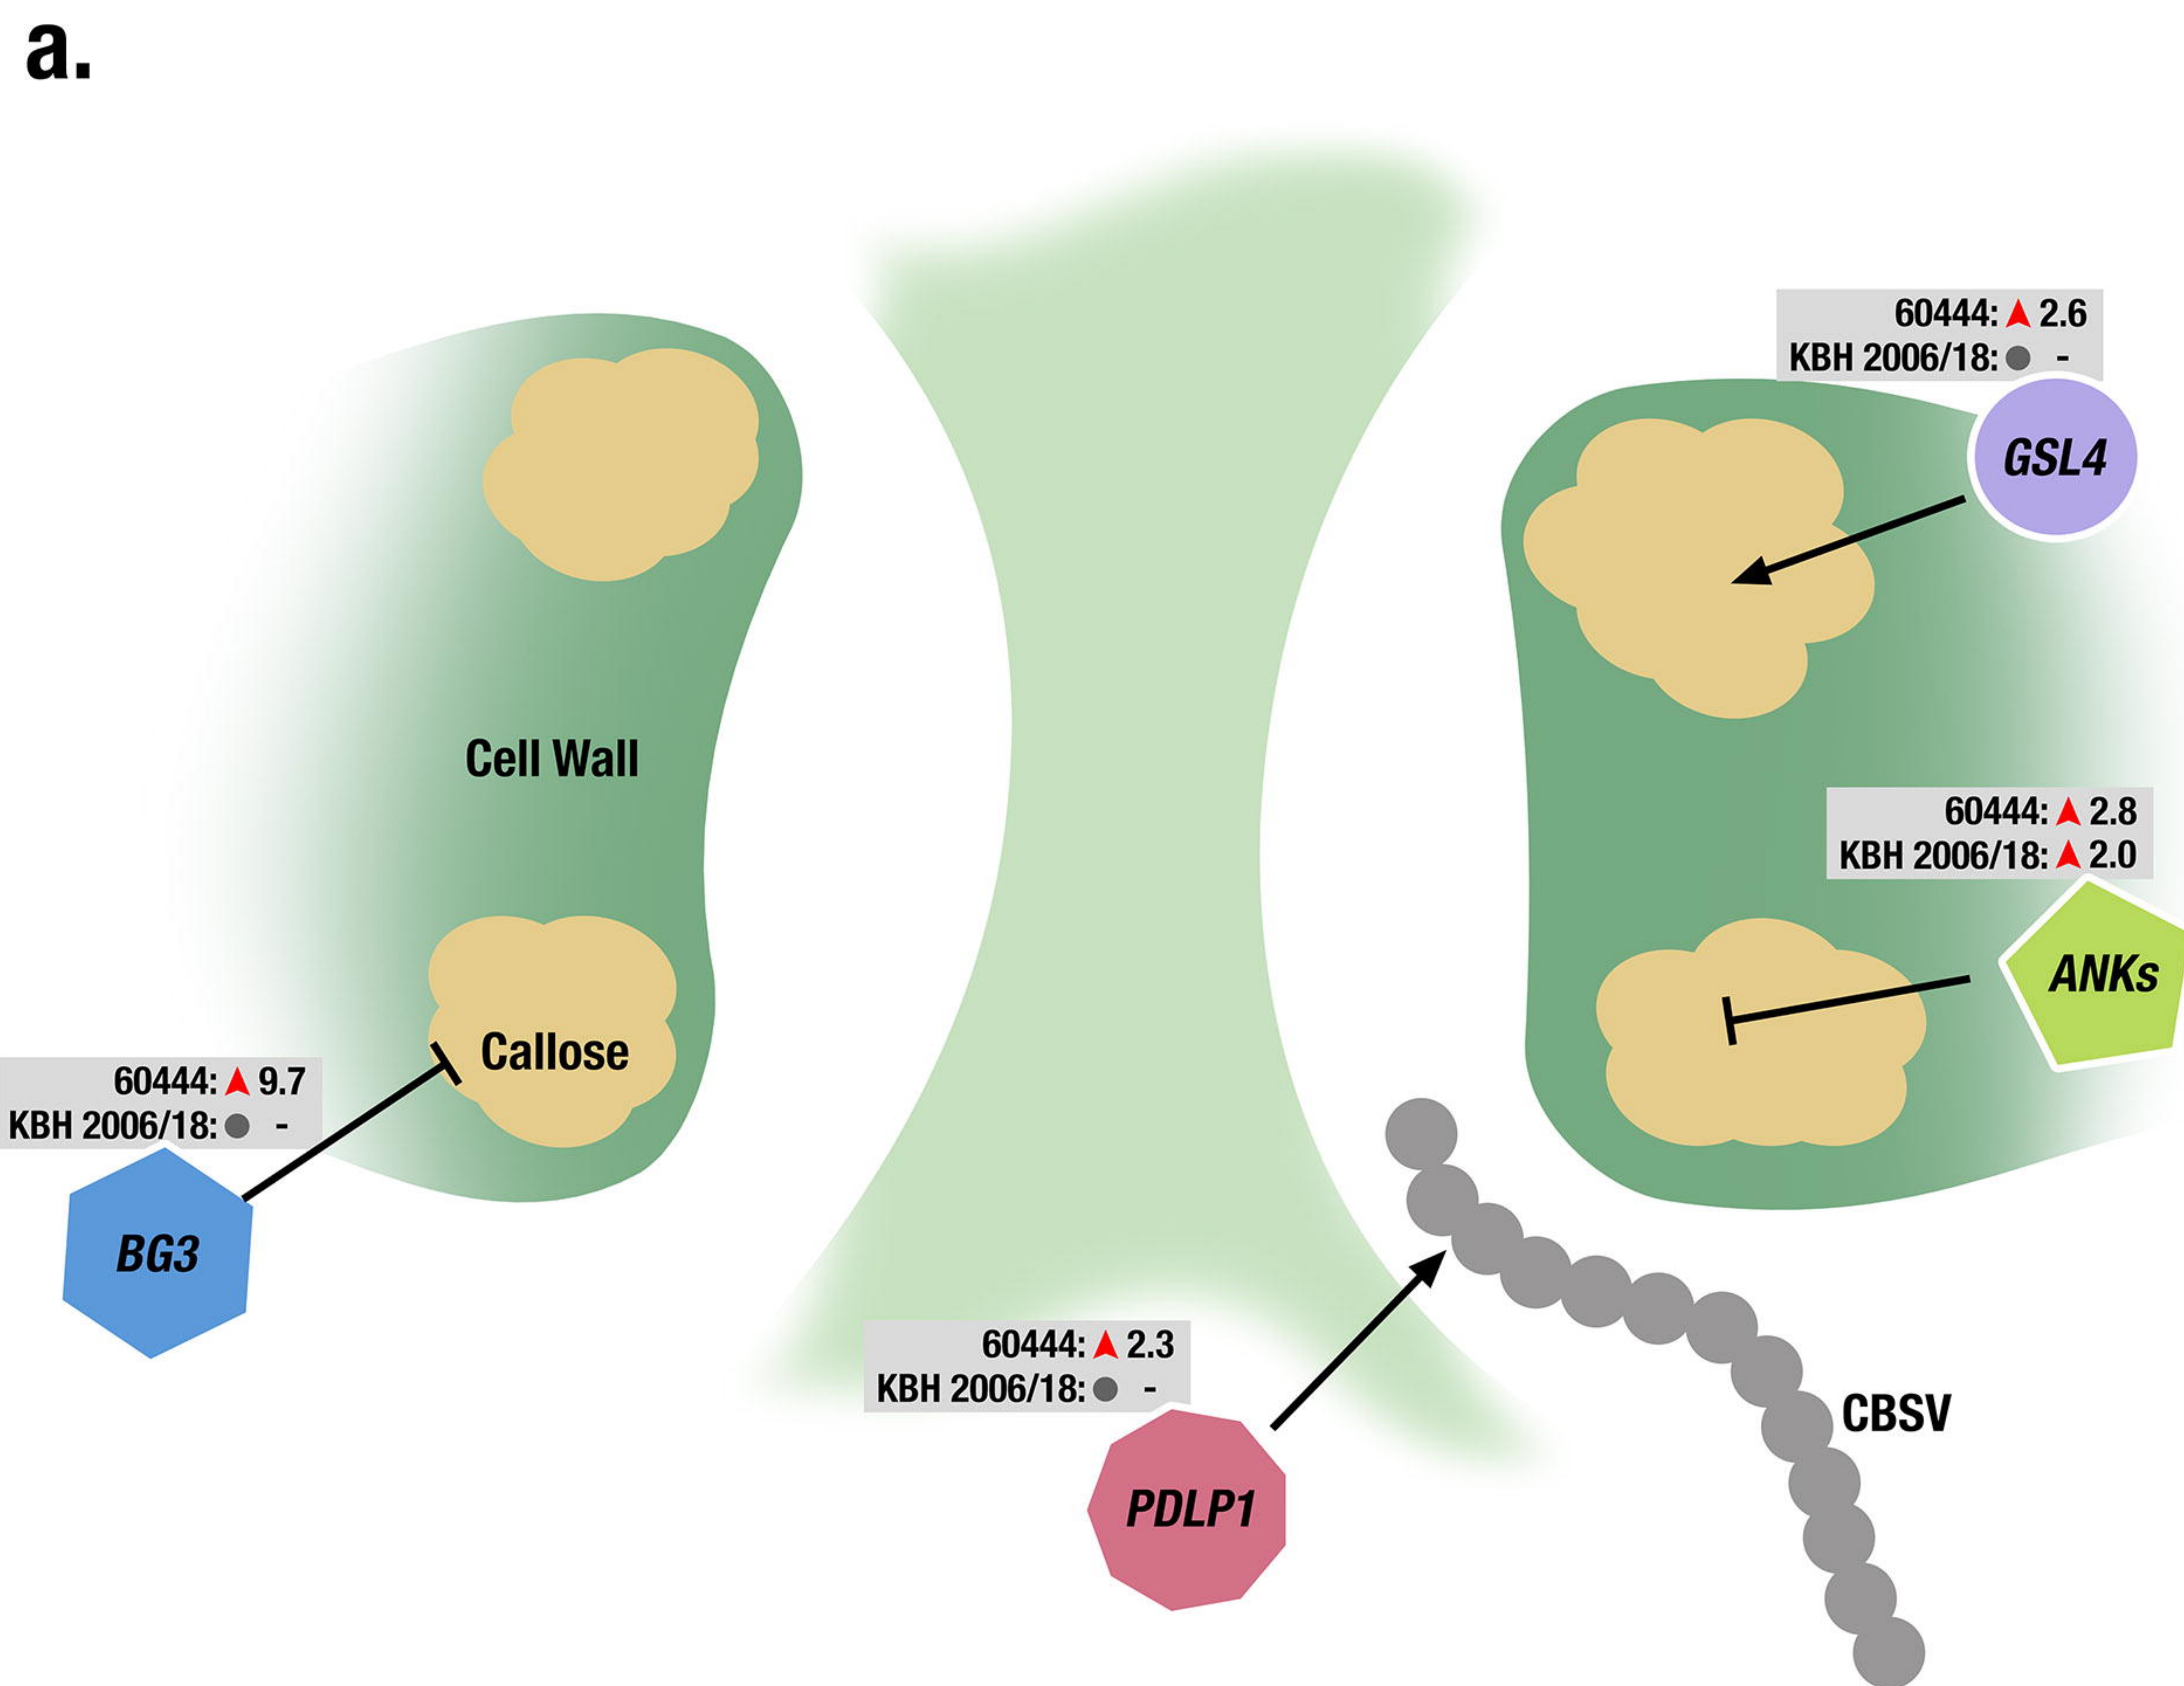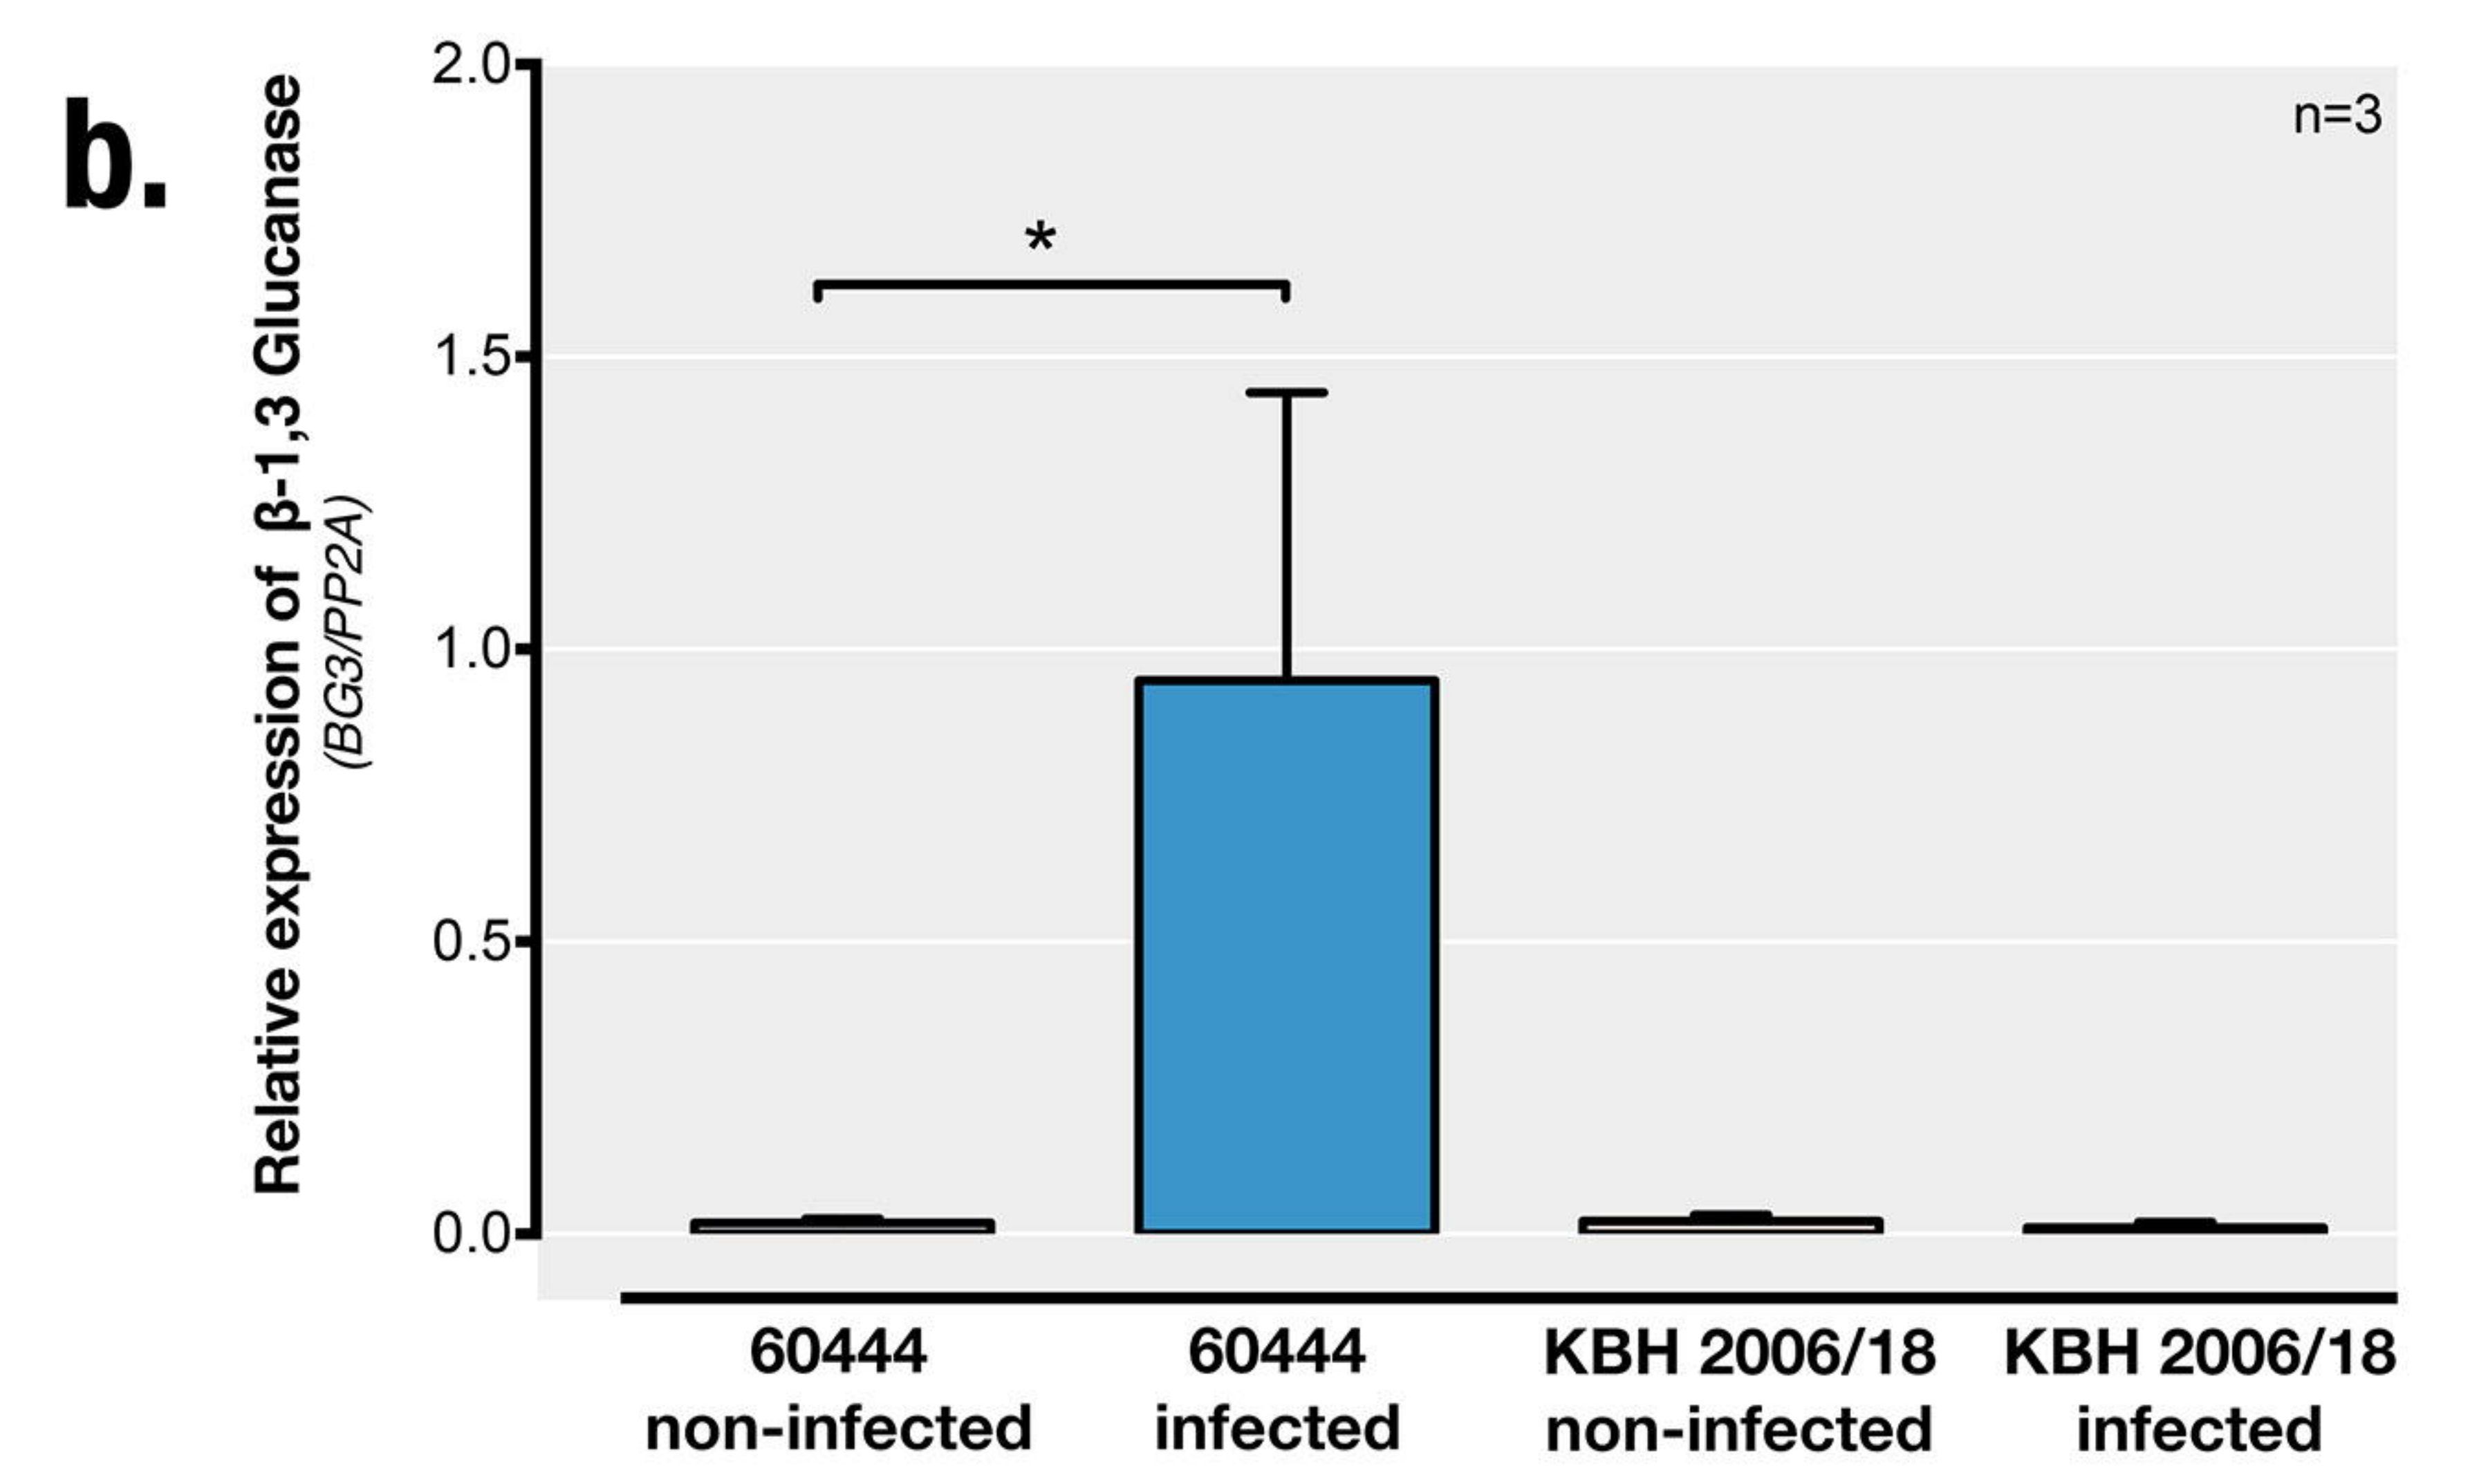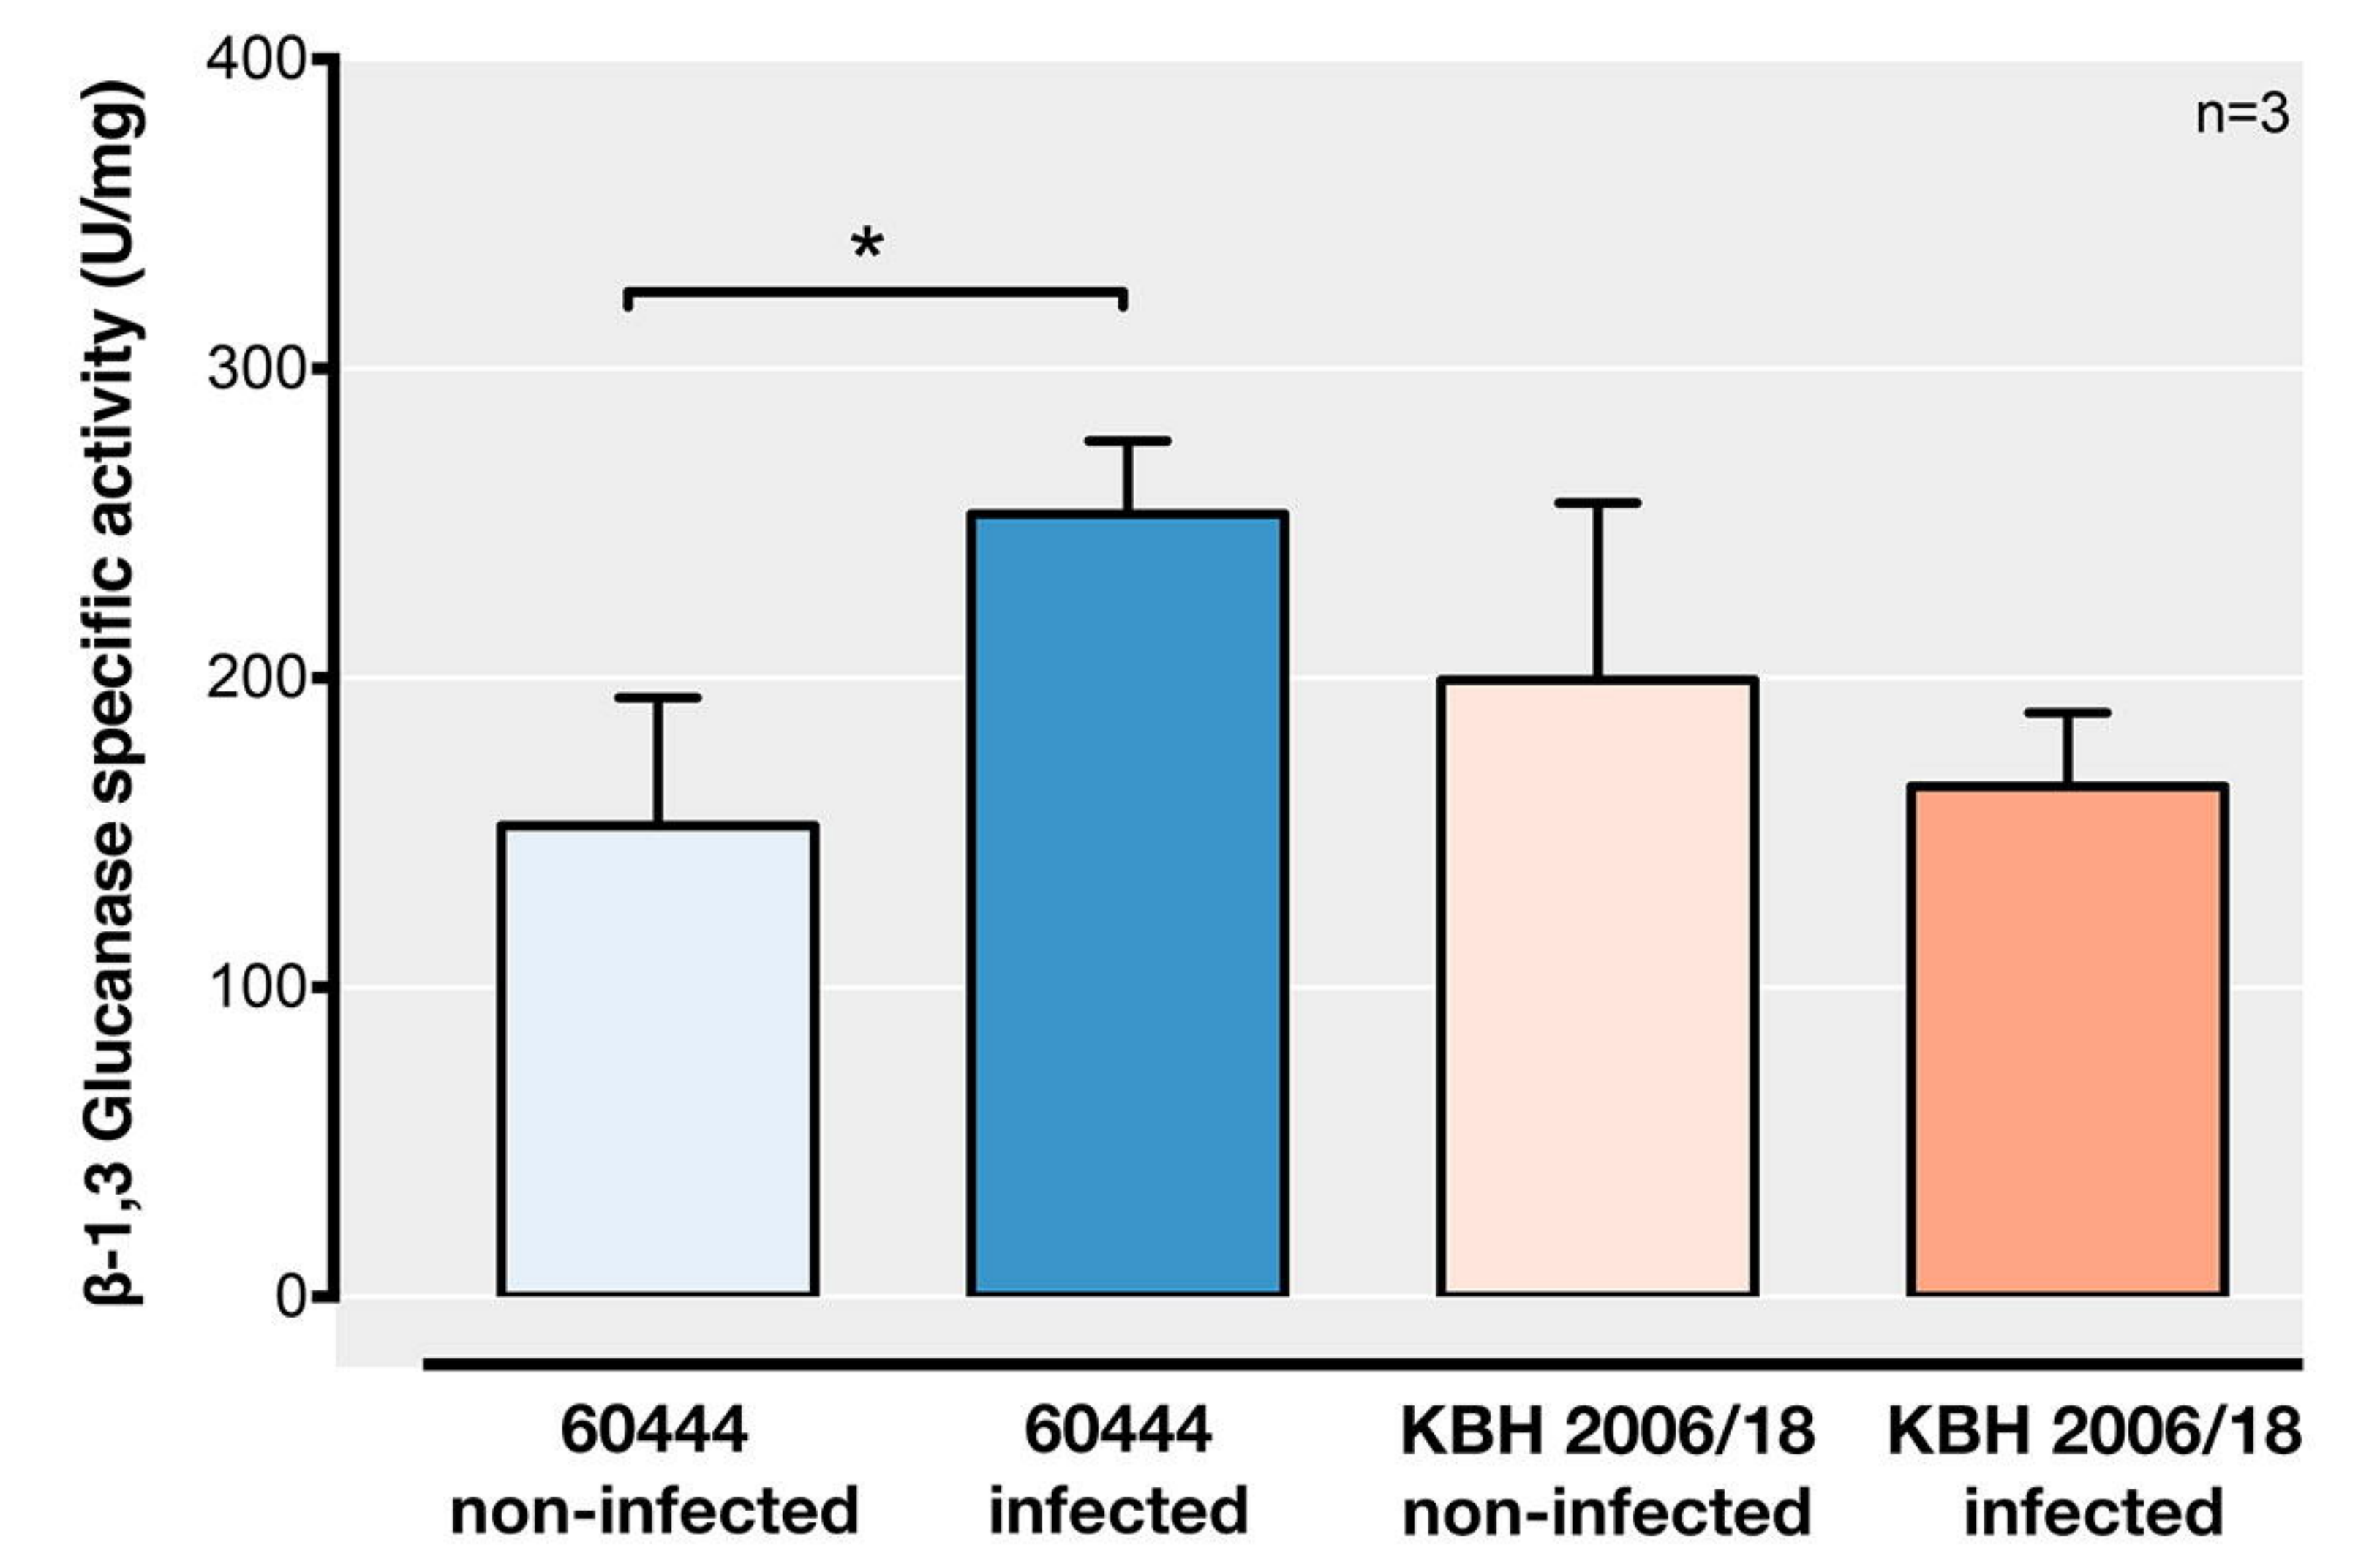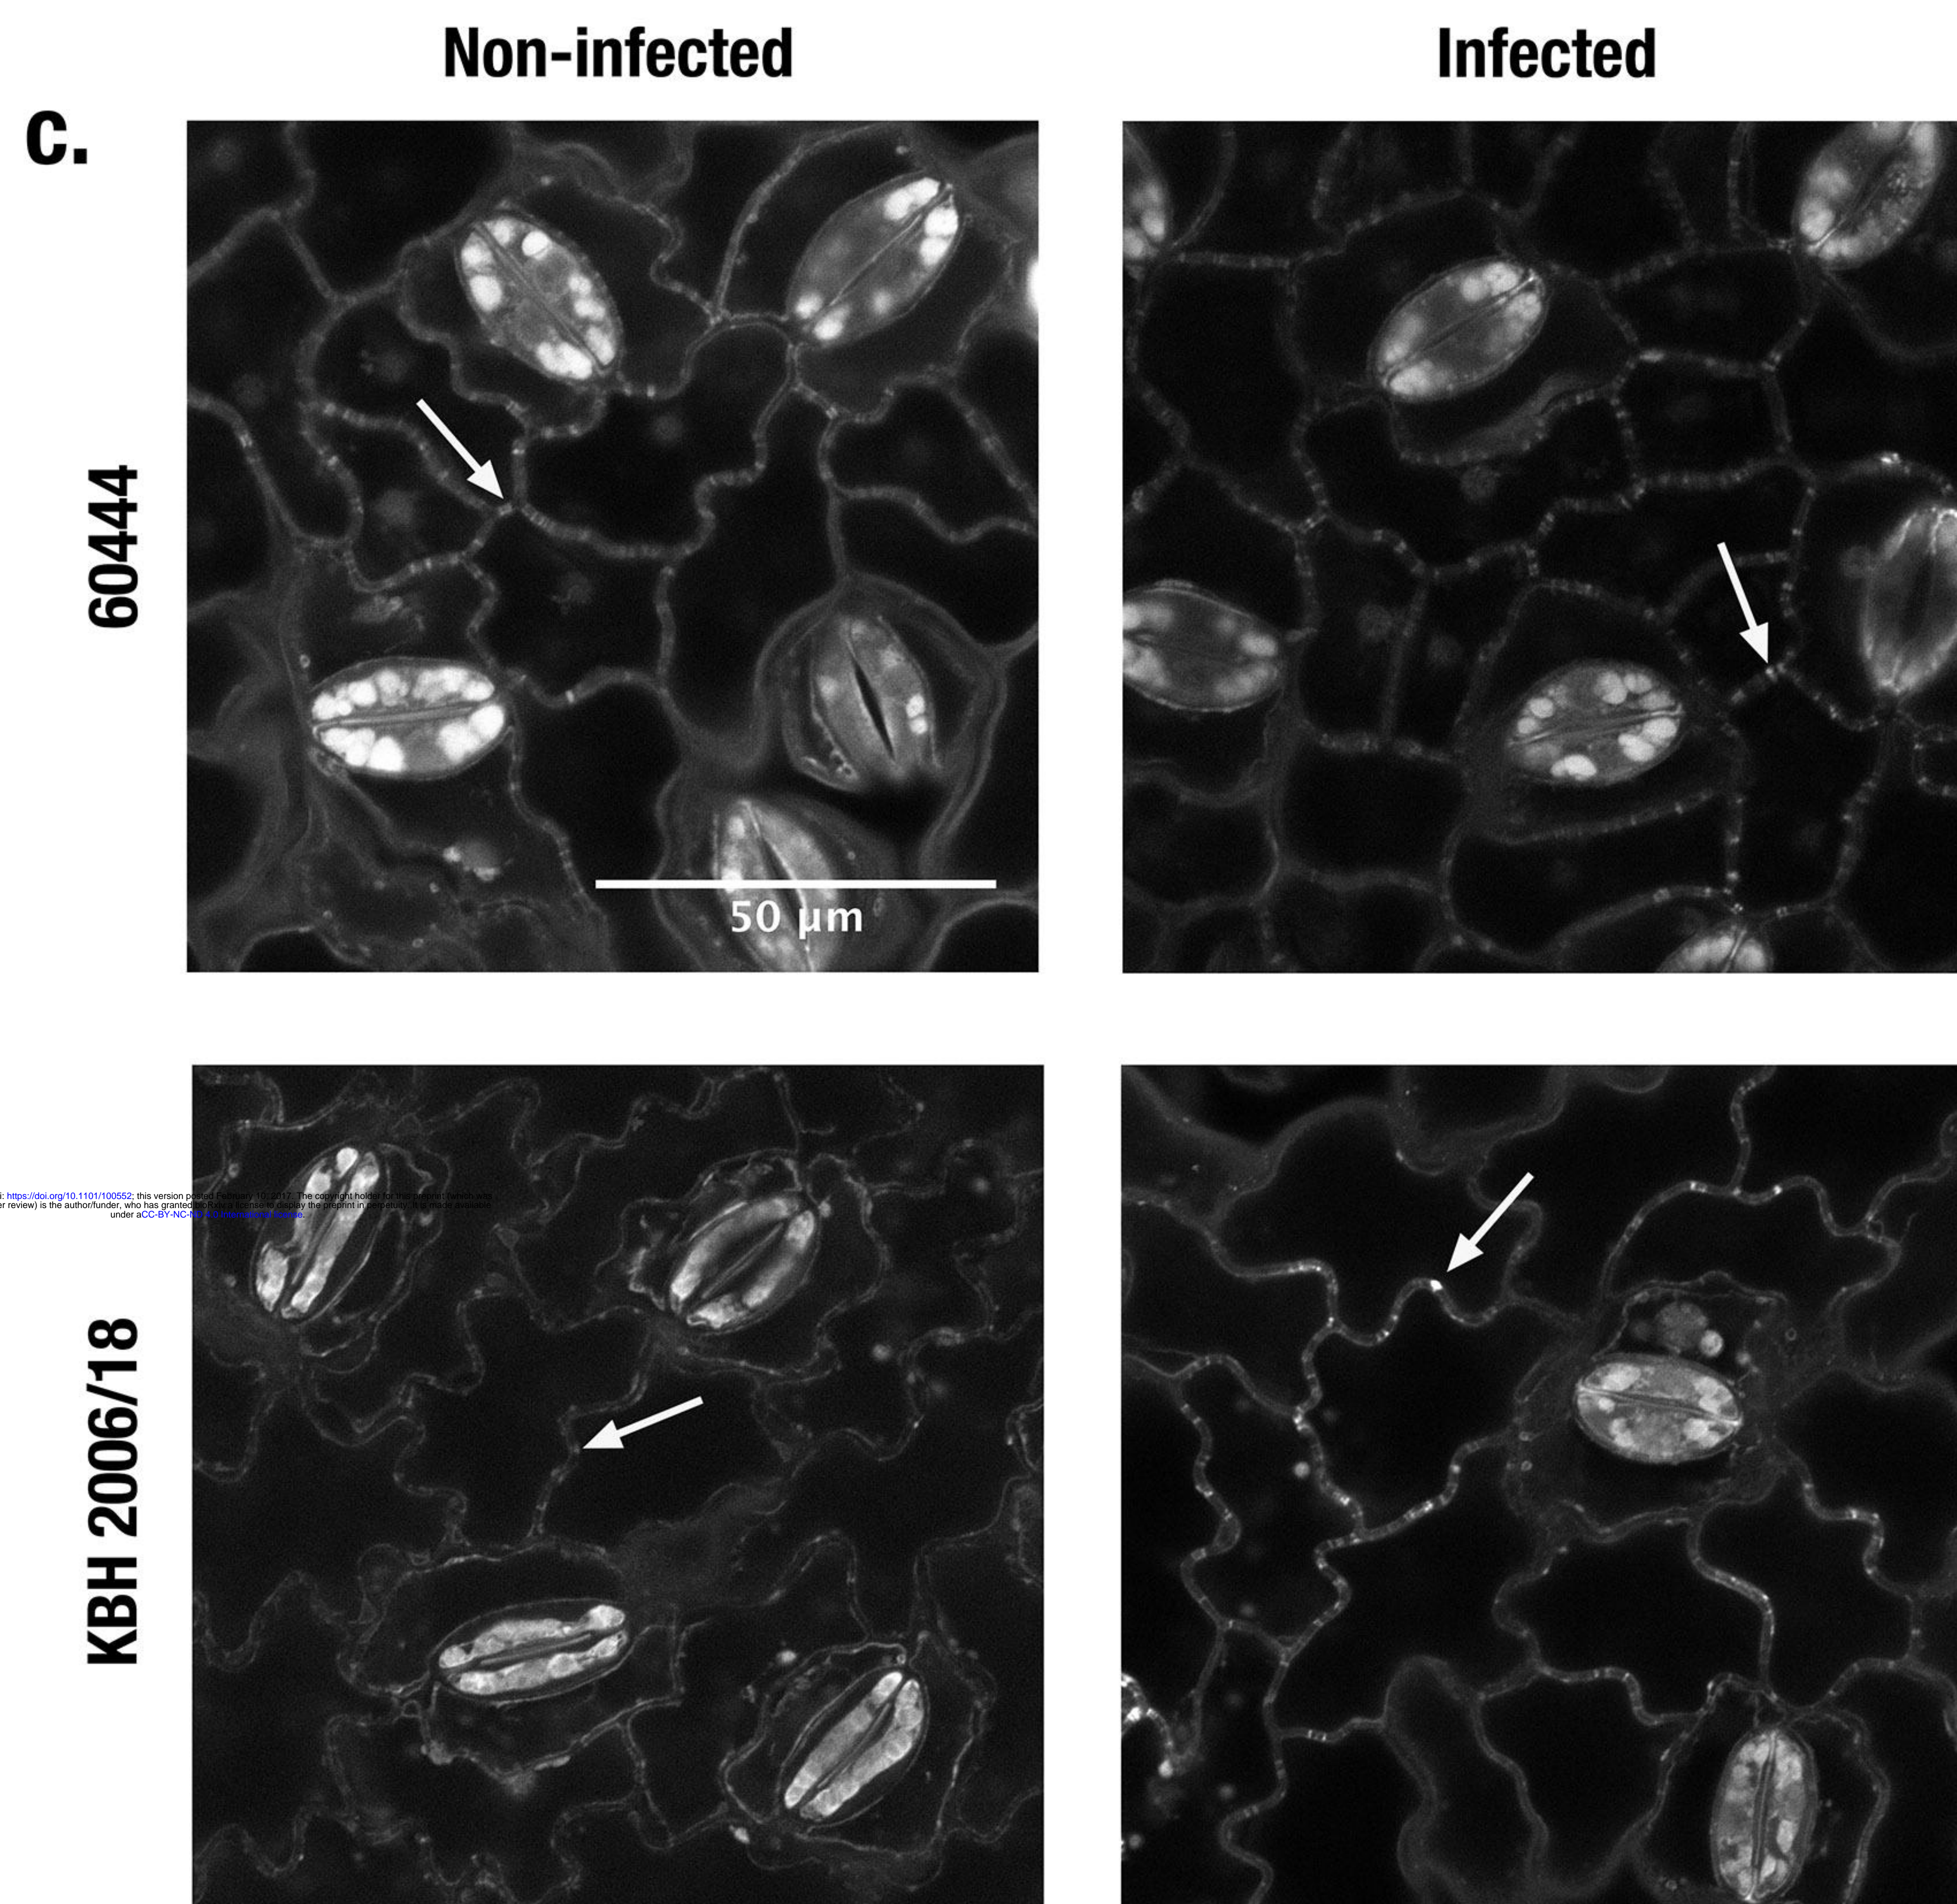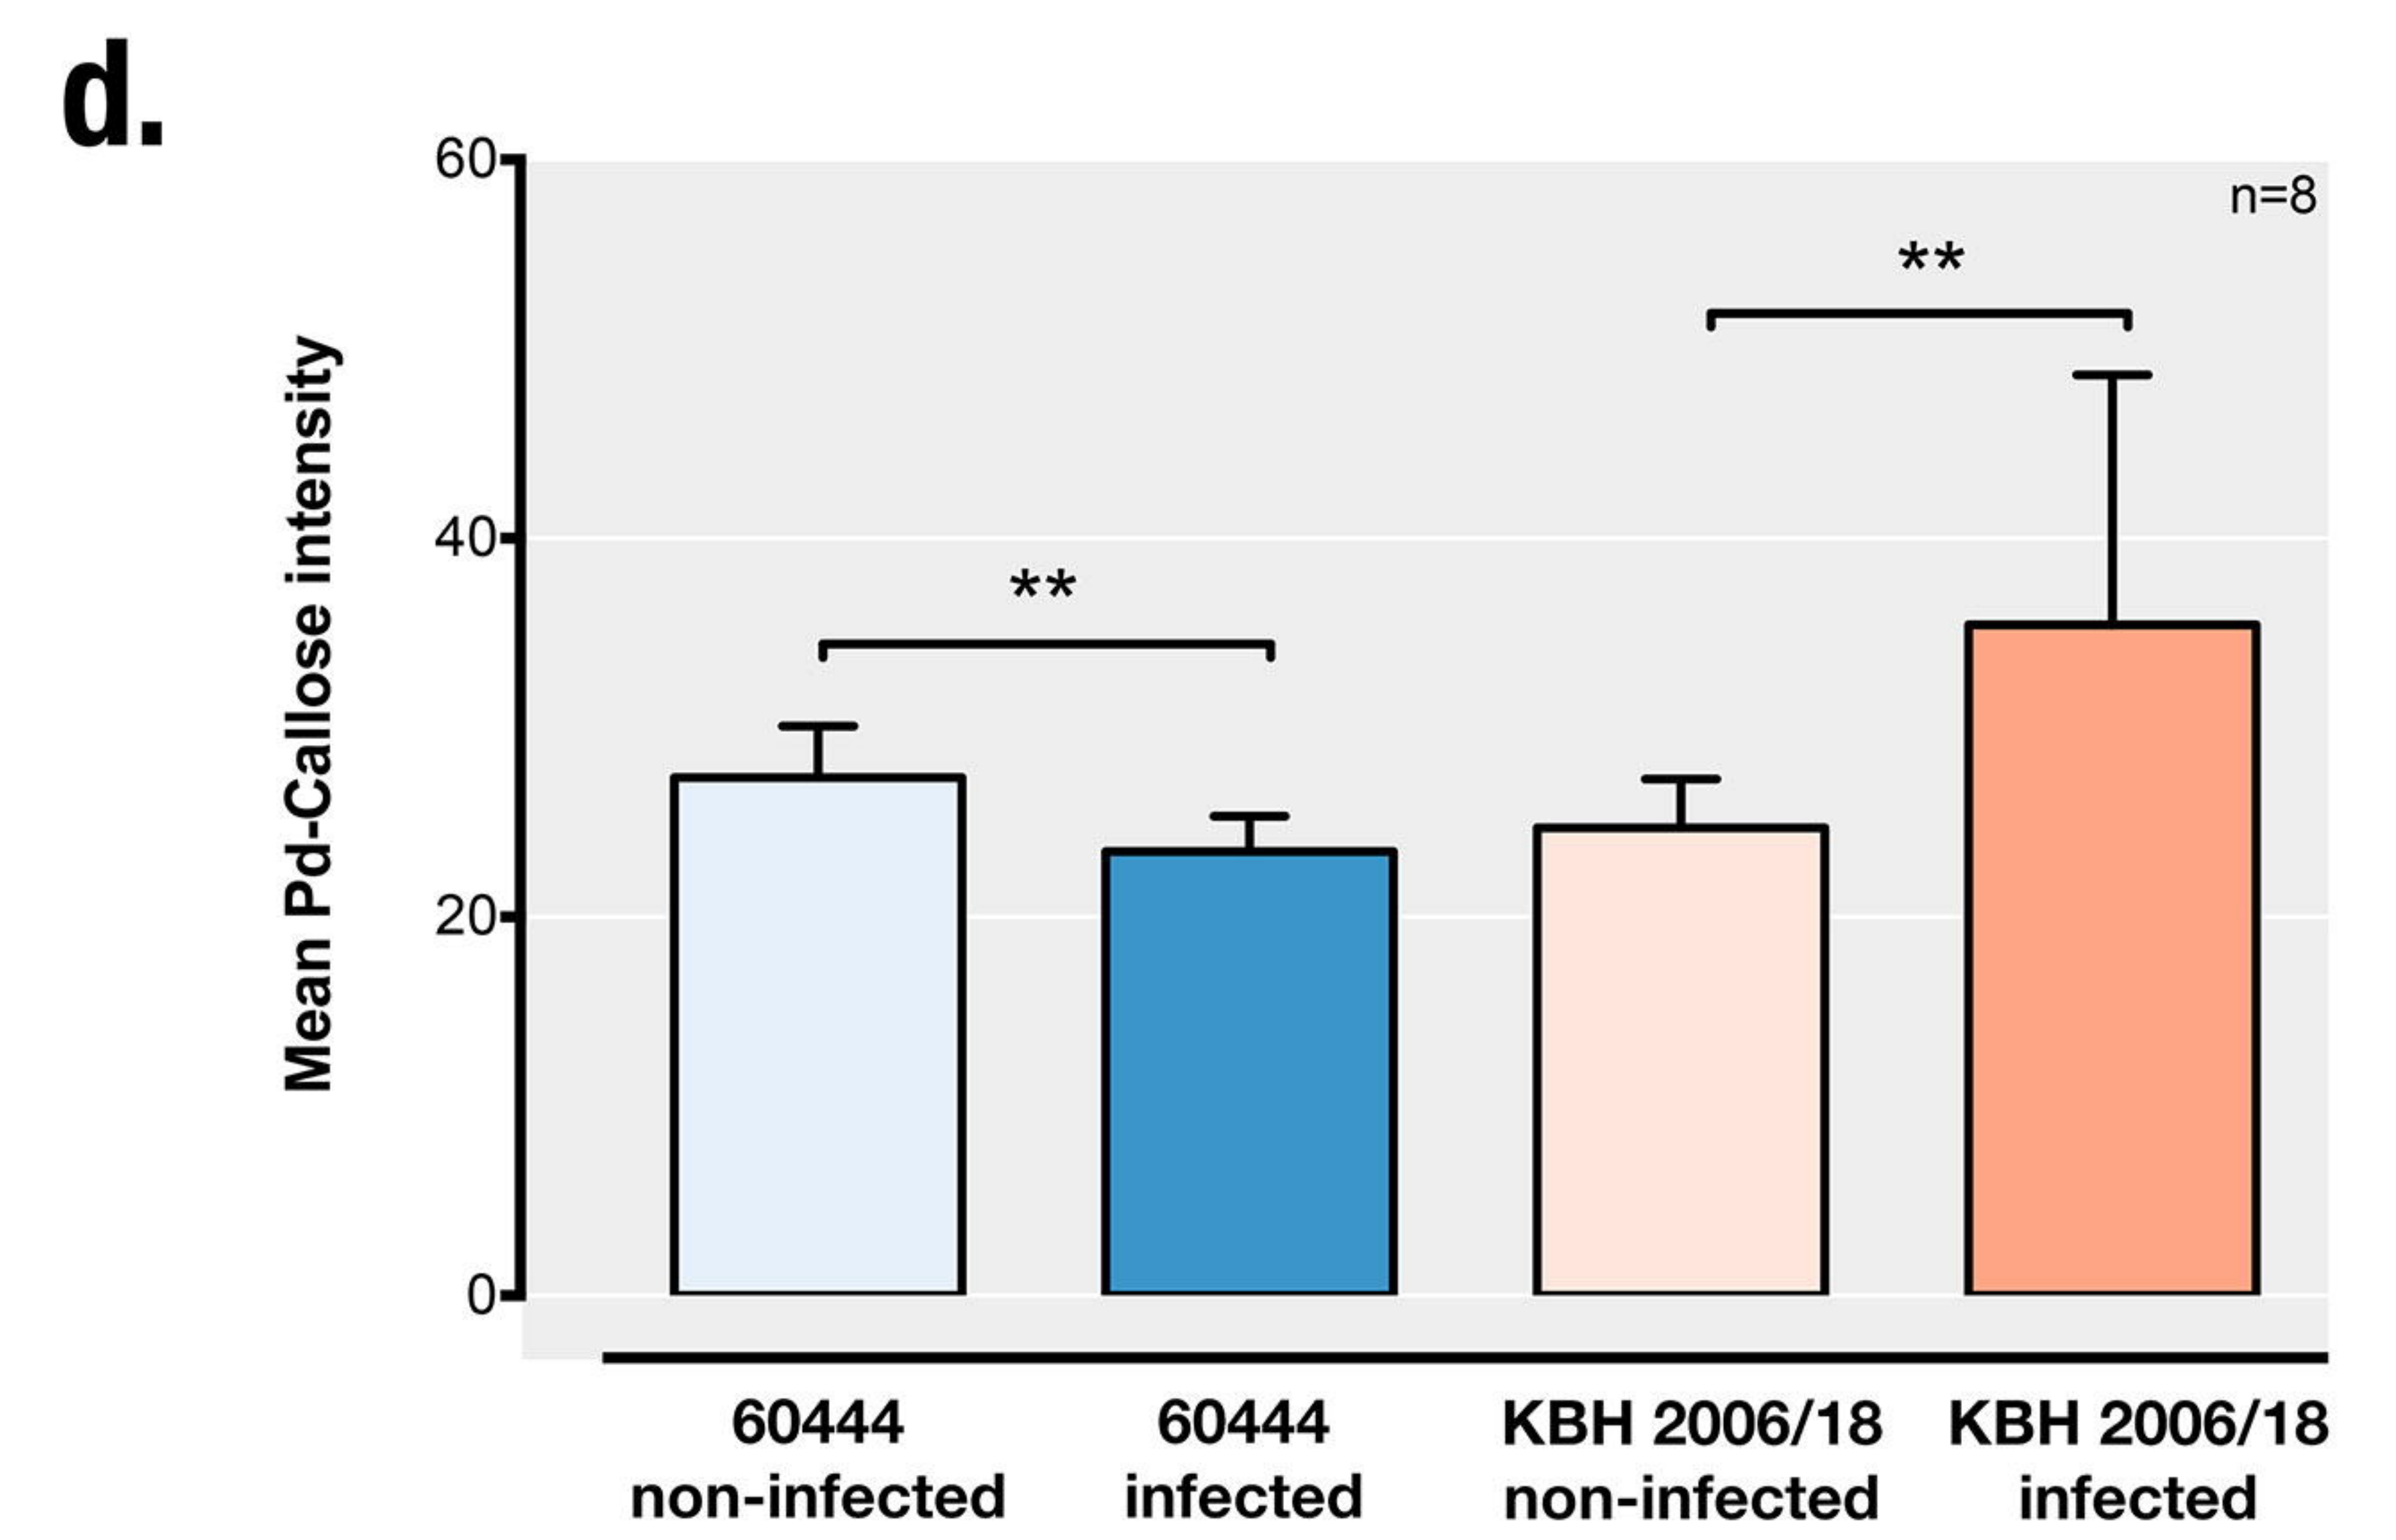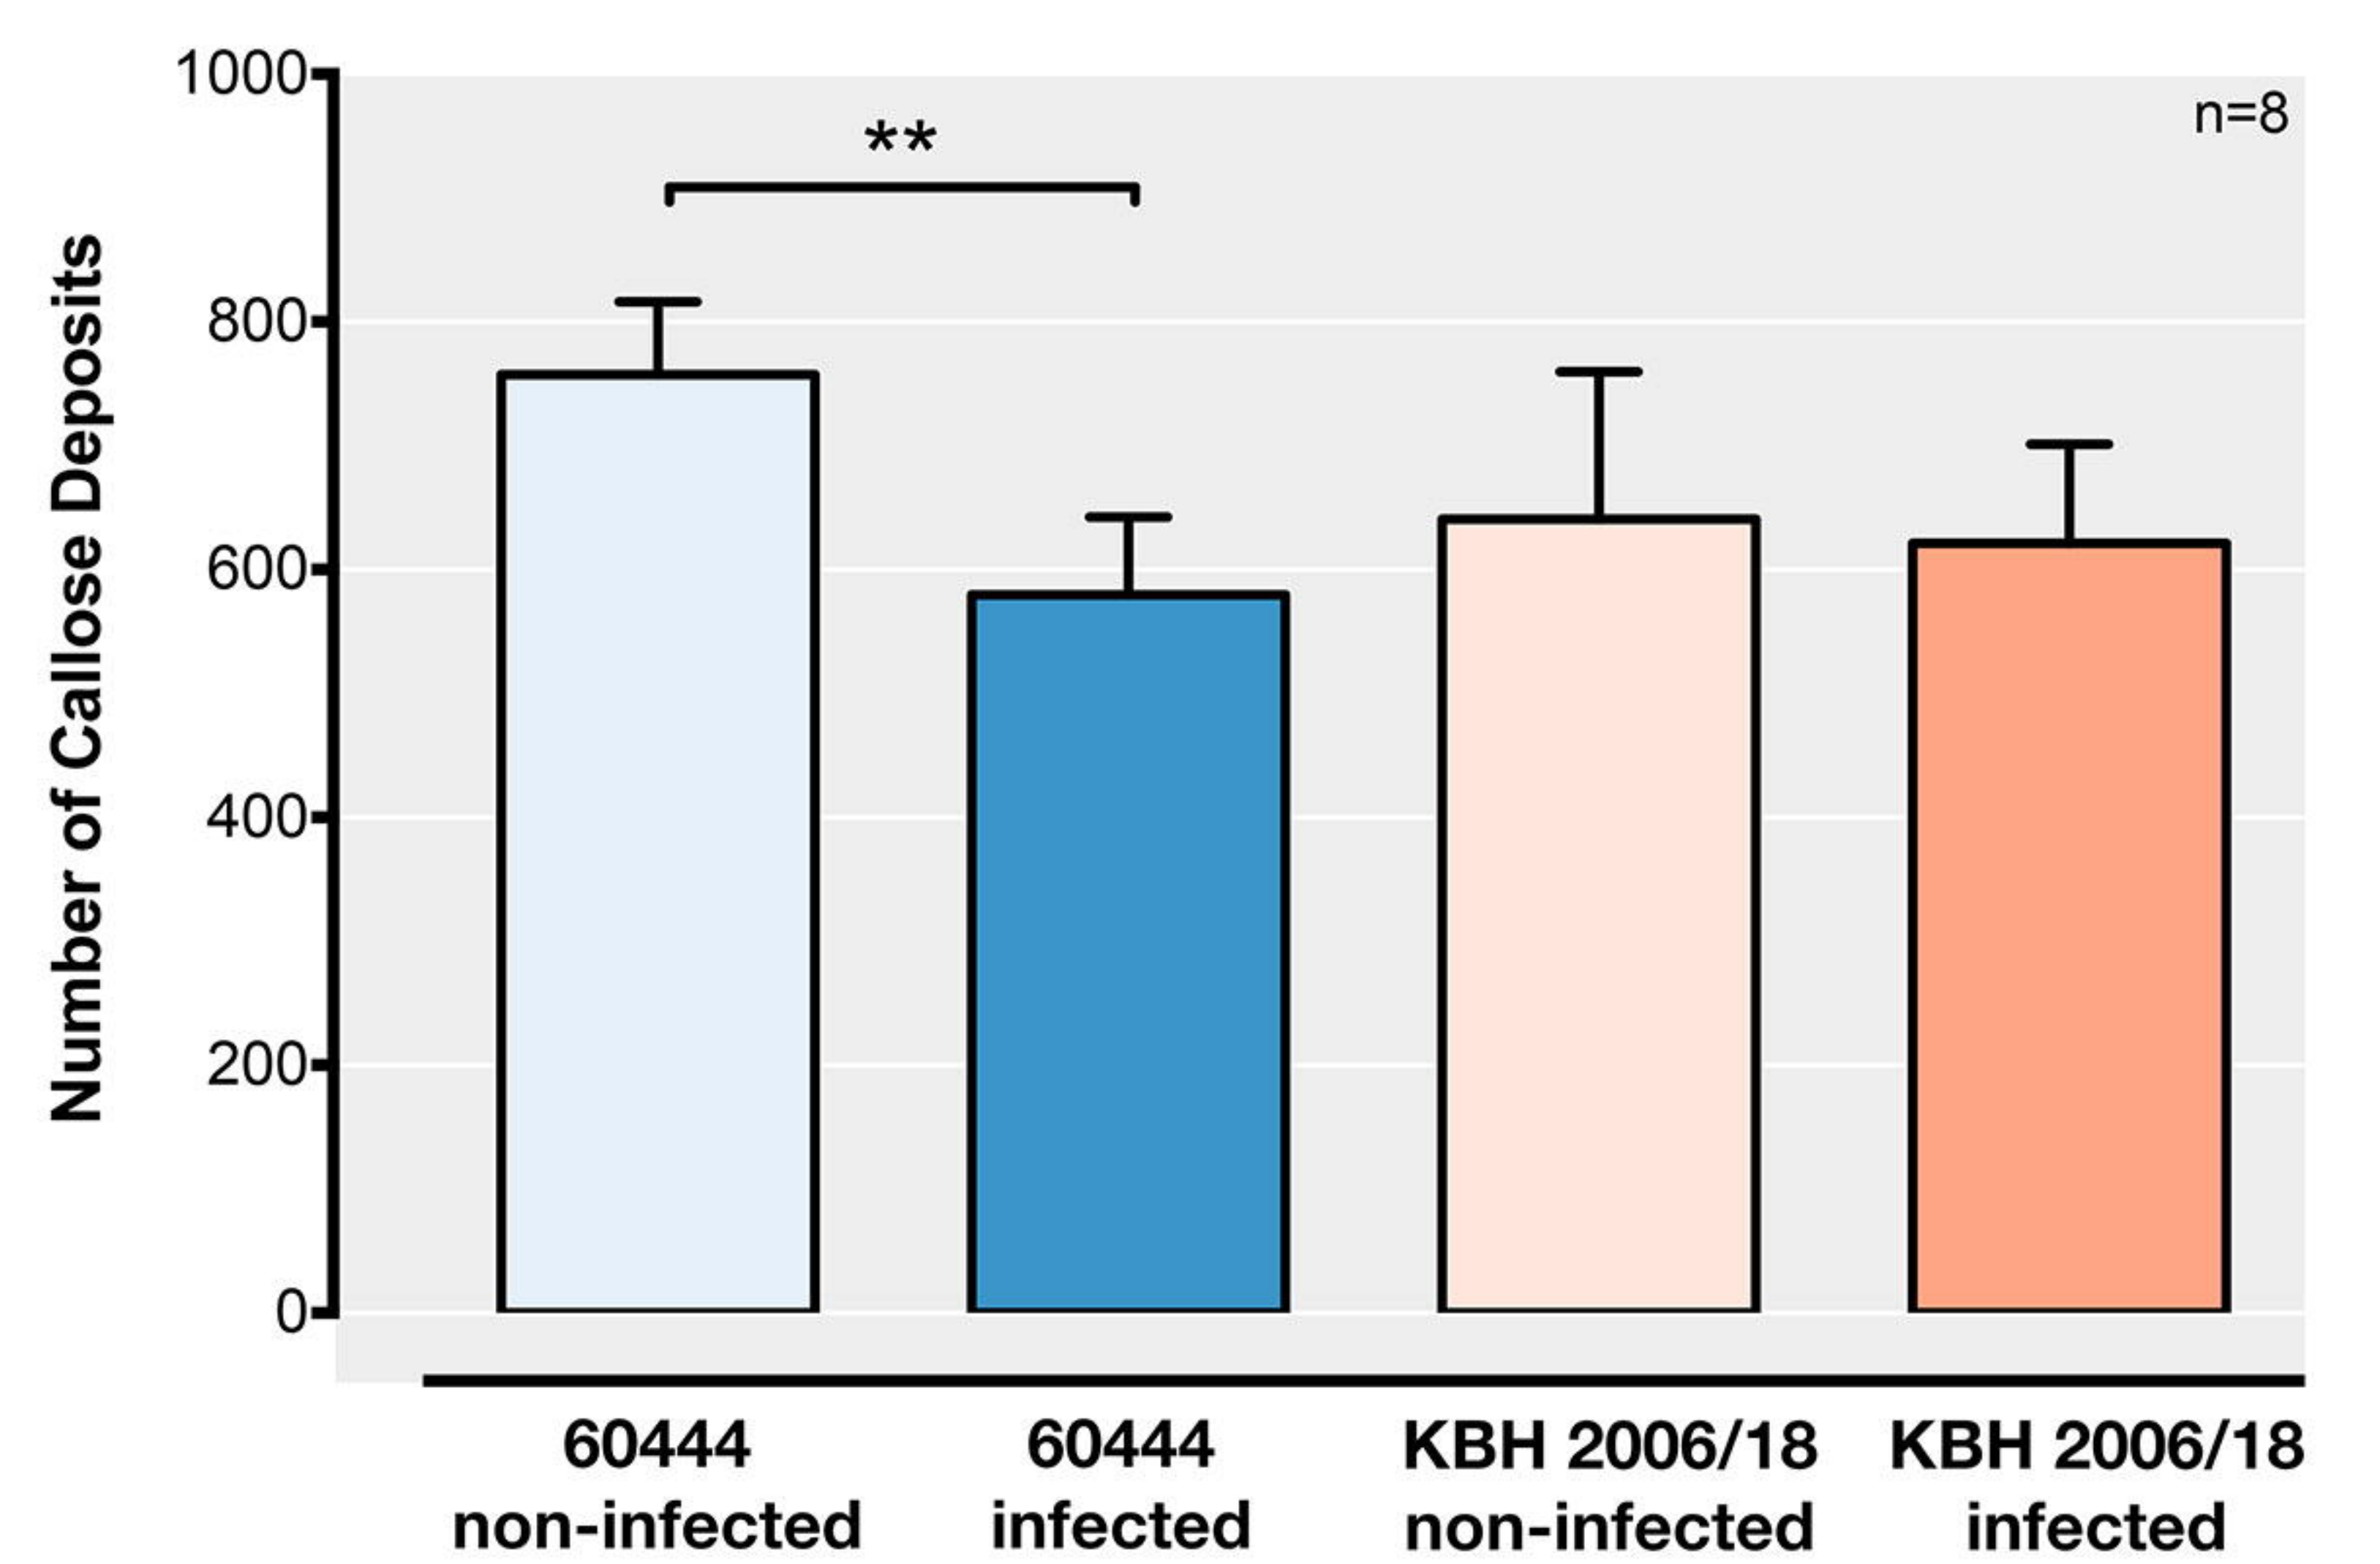



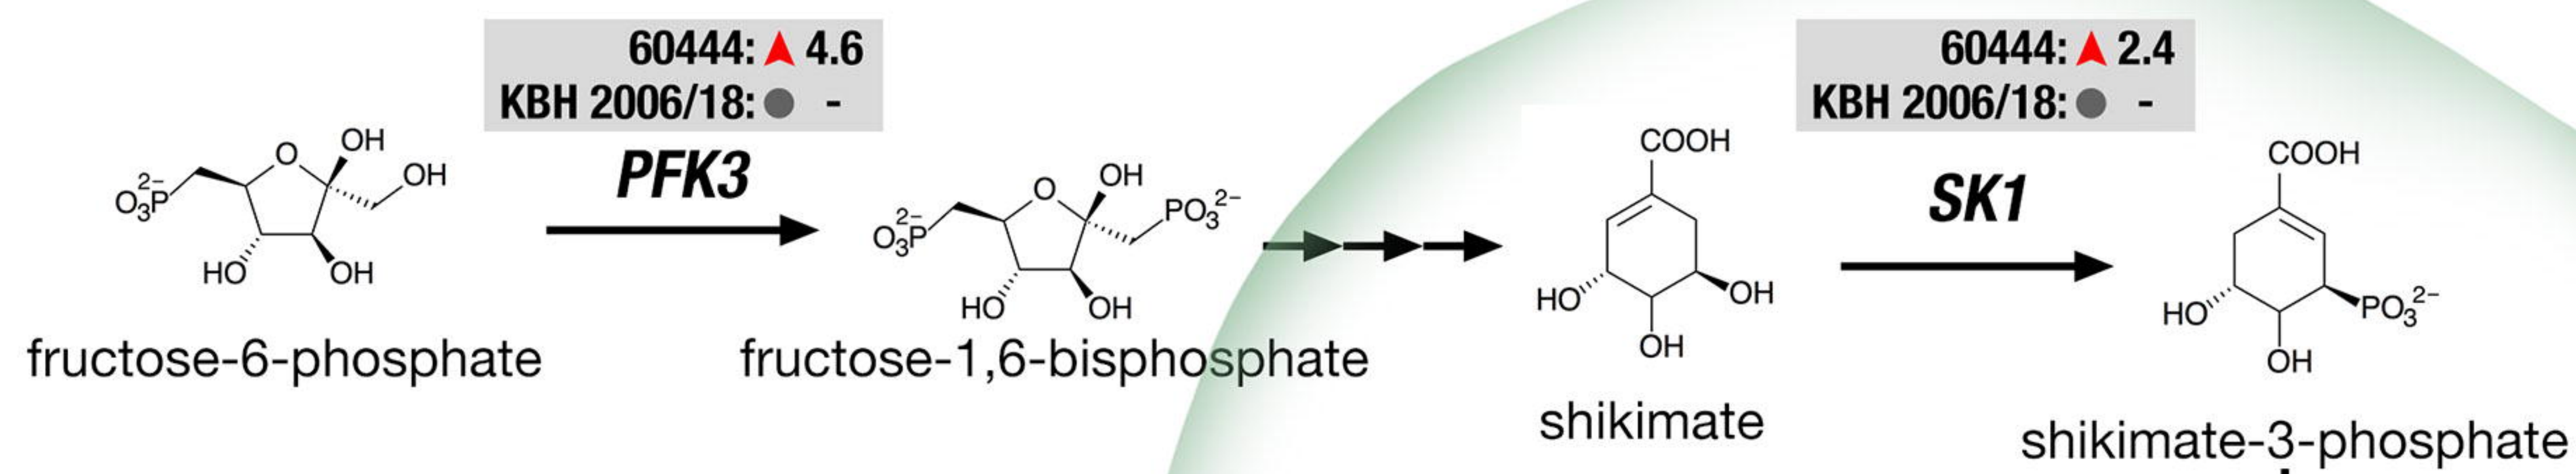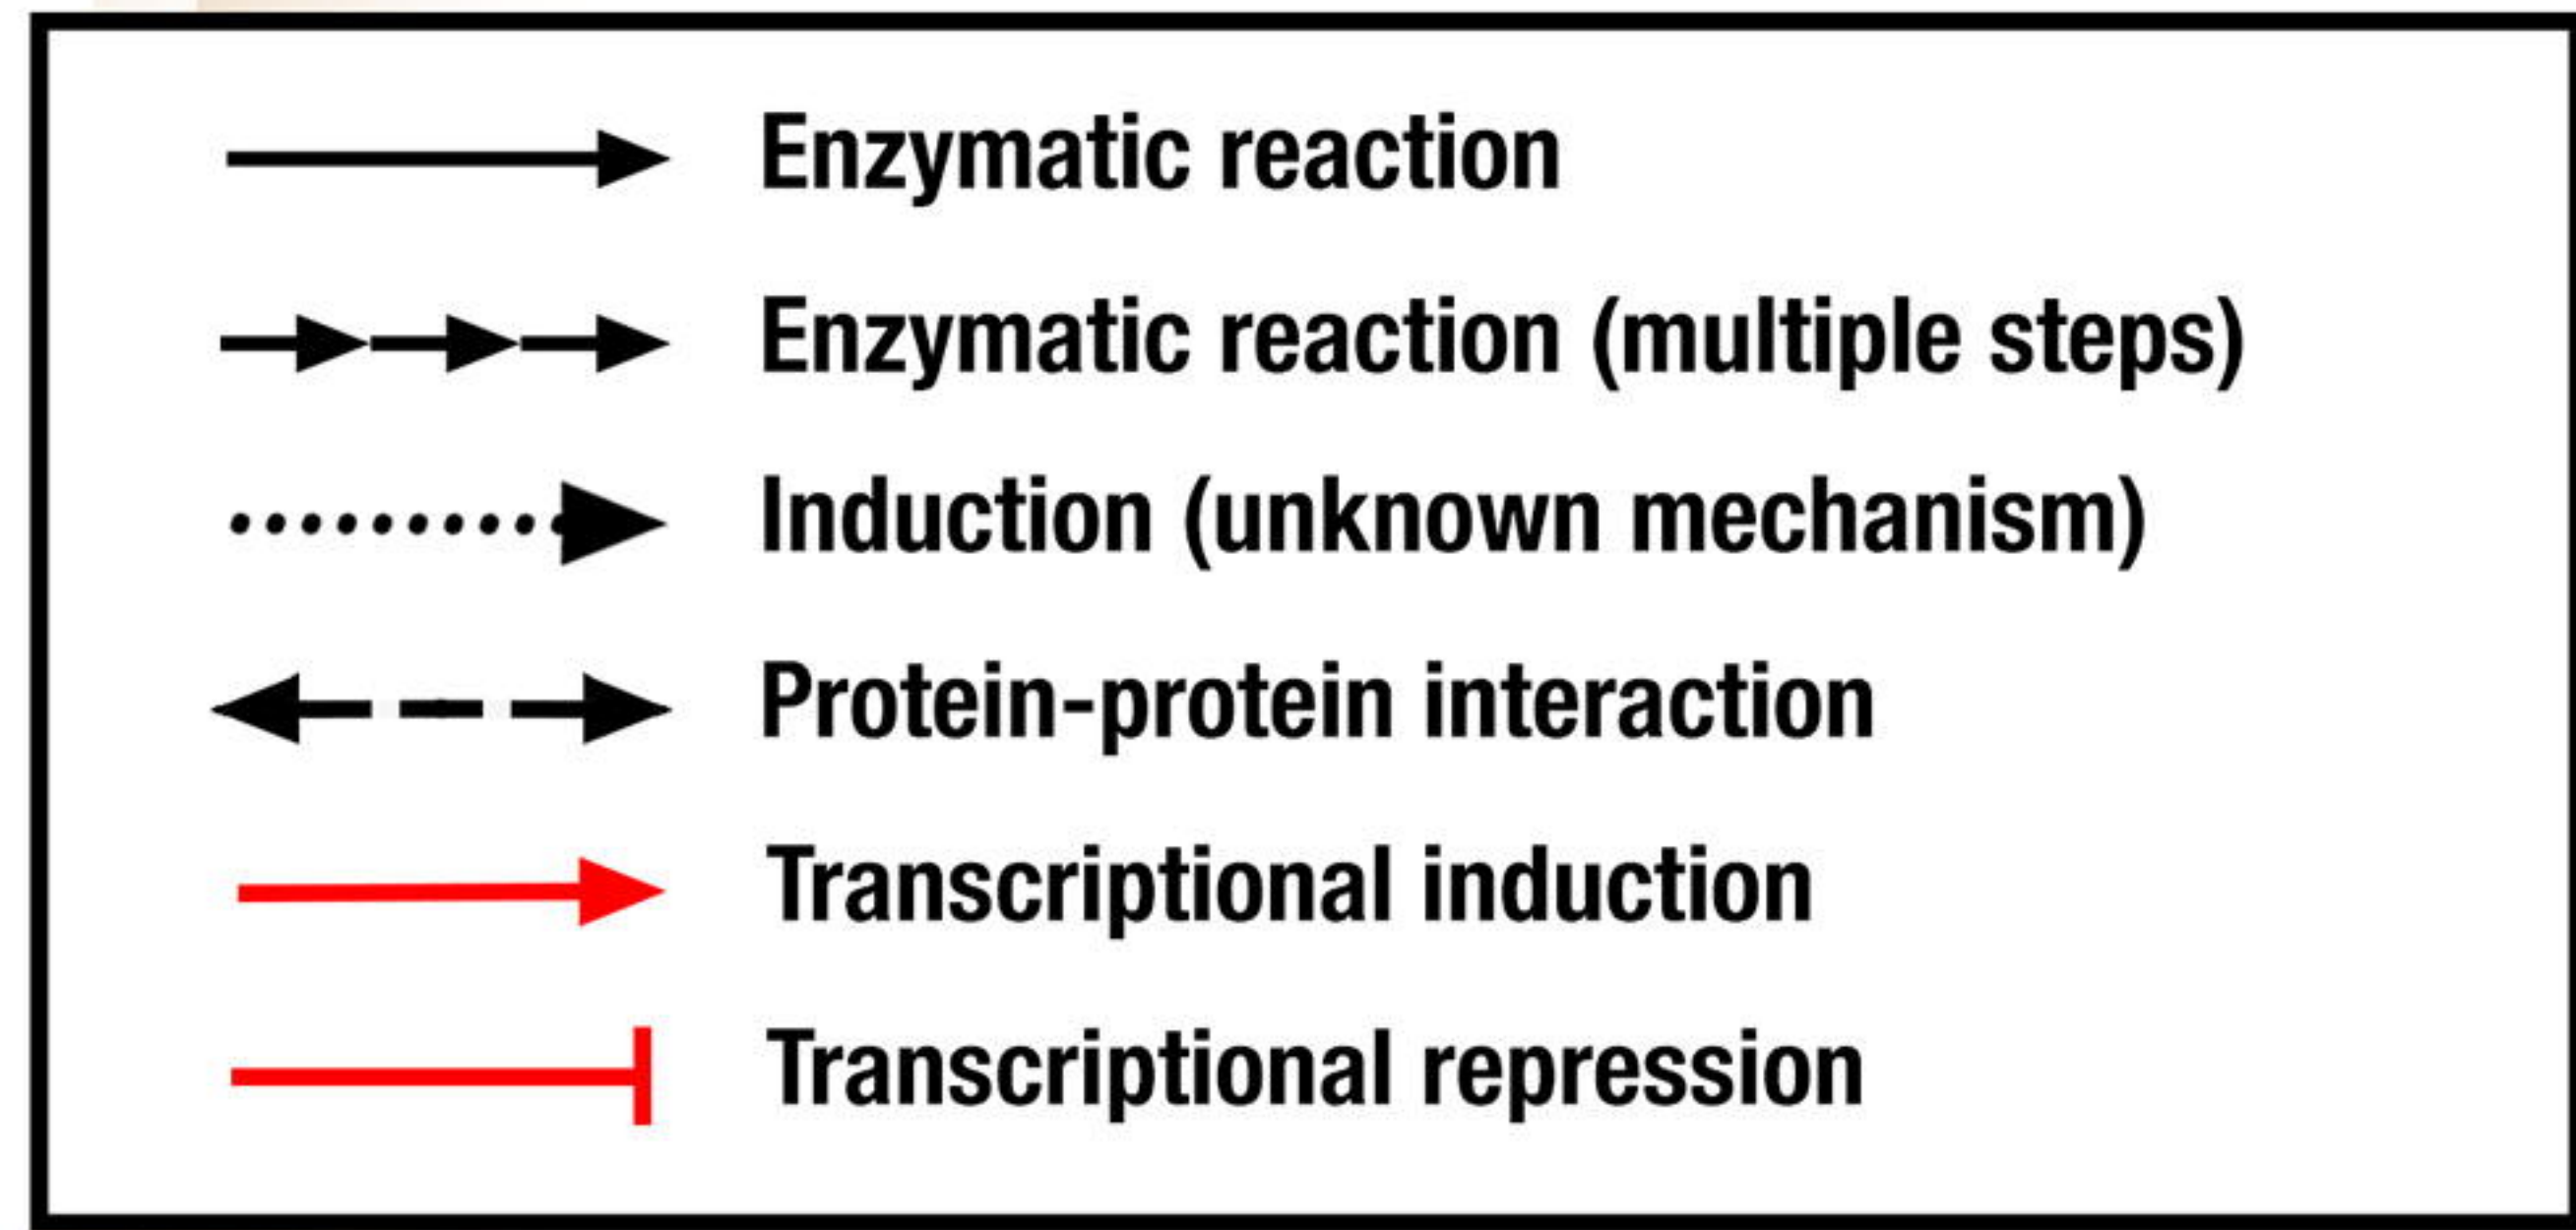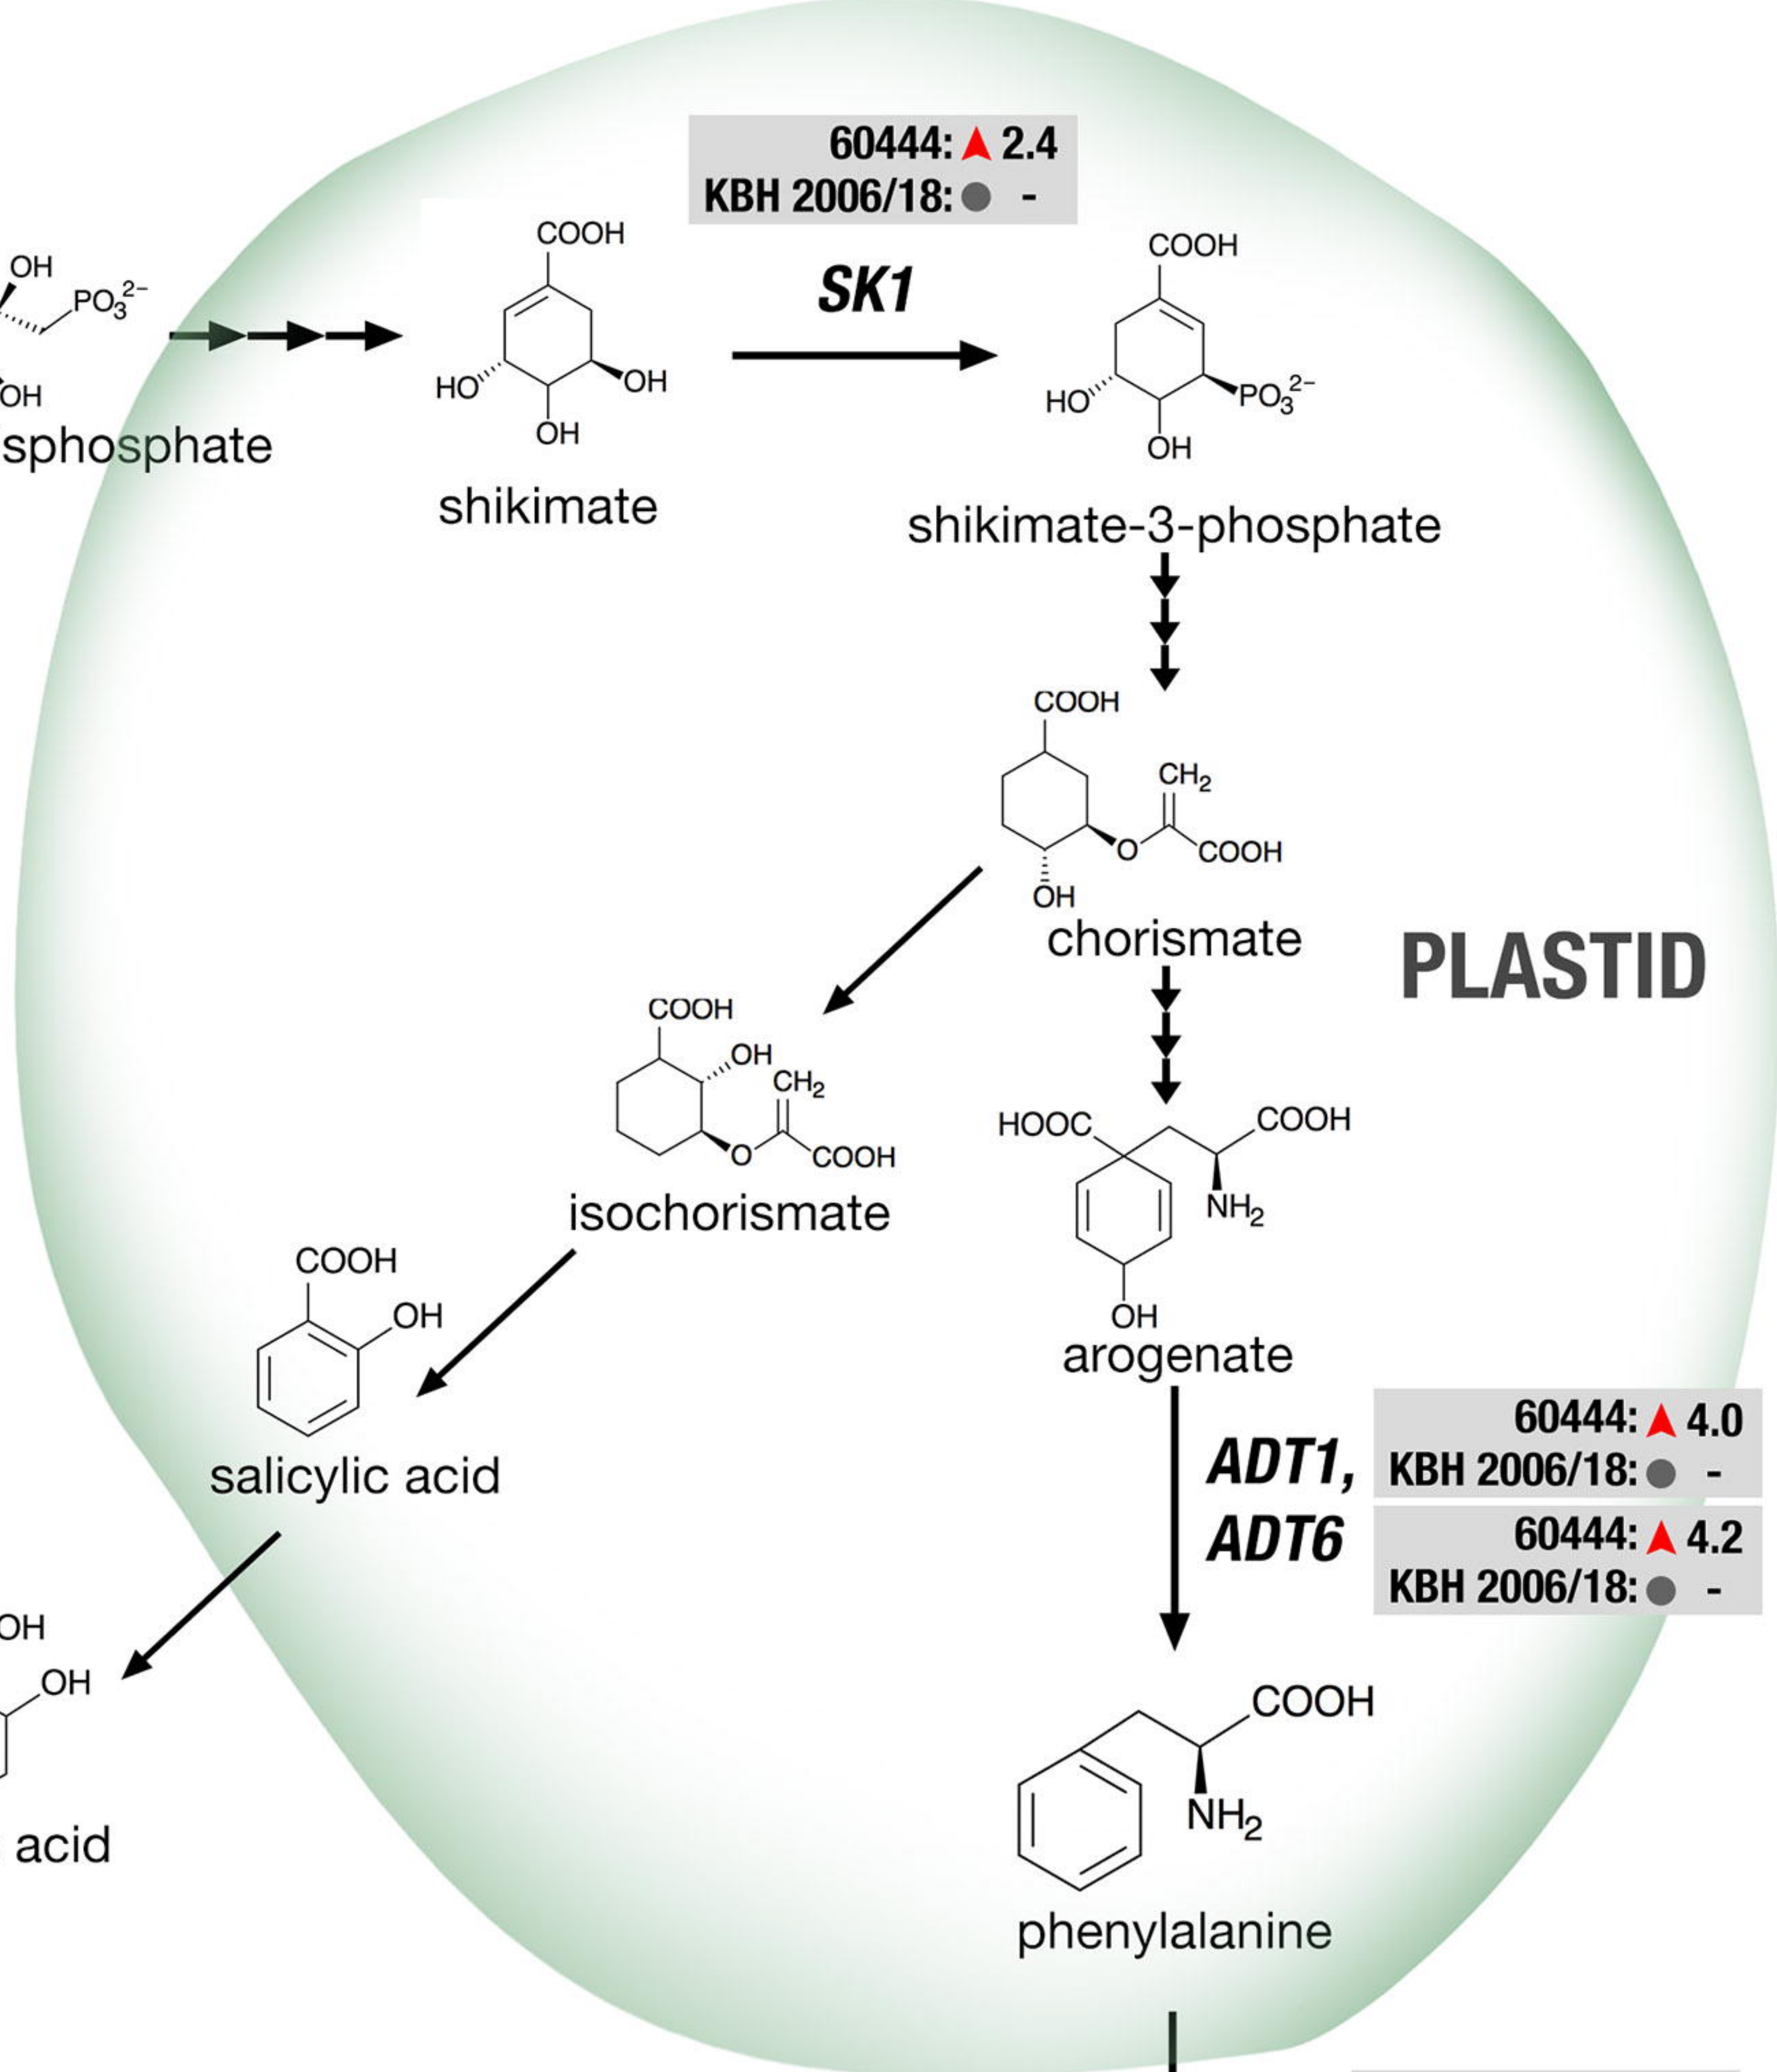

**CELL WALL**

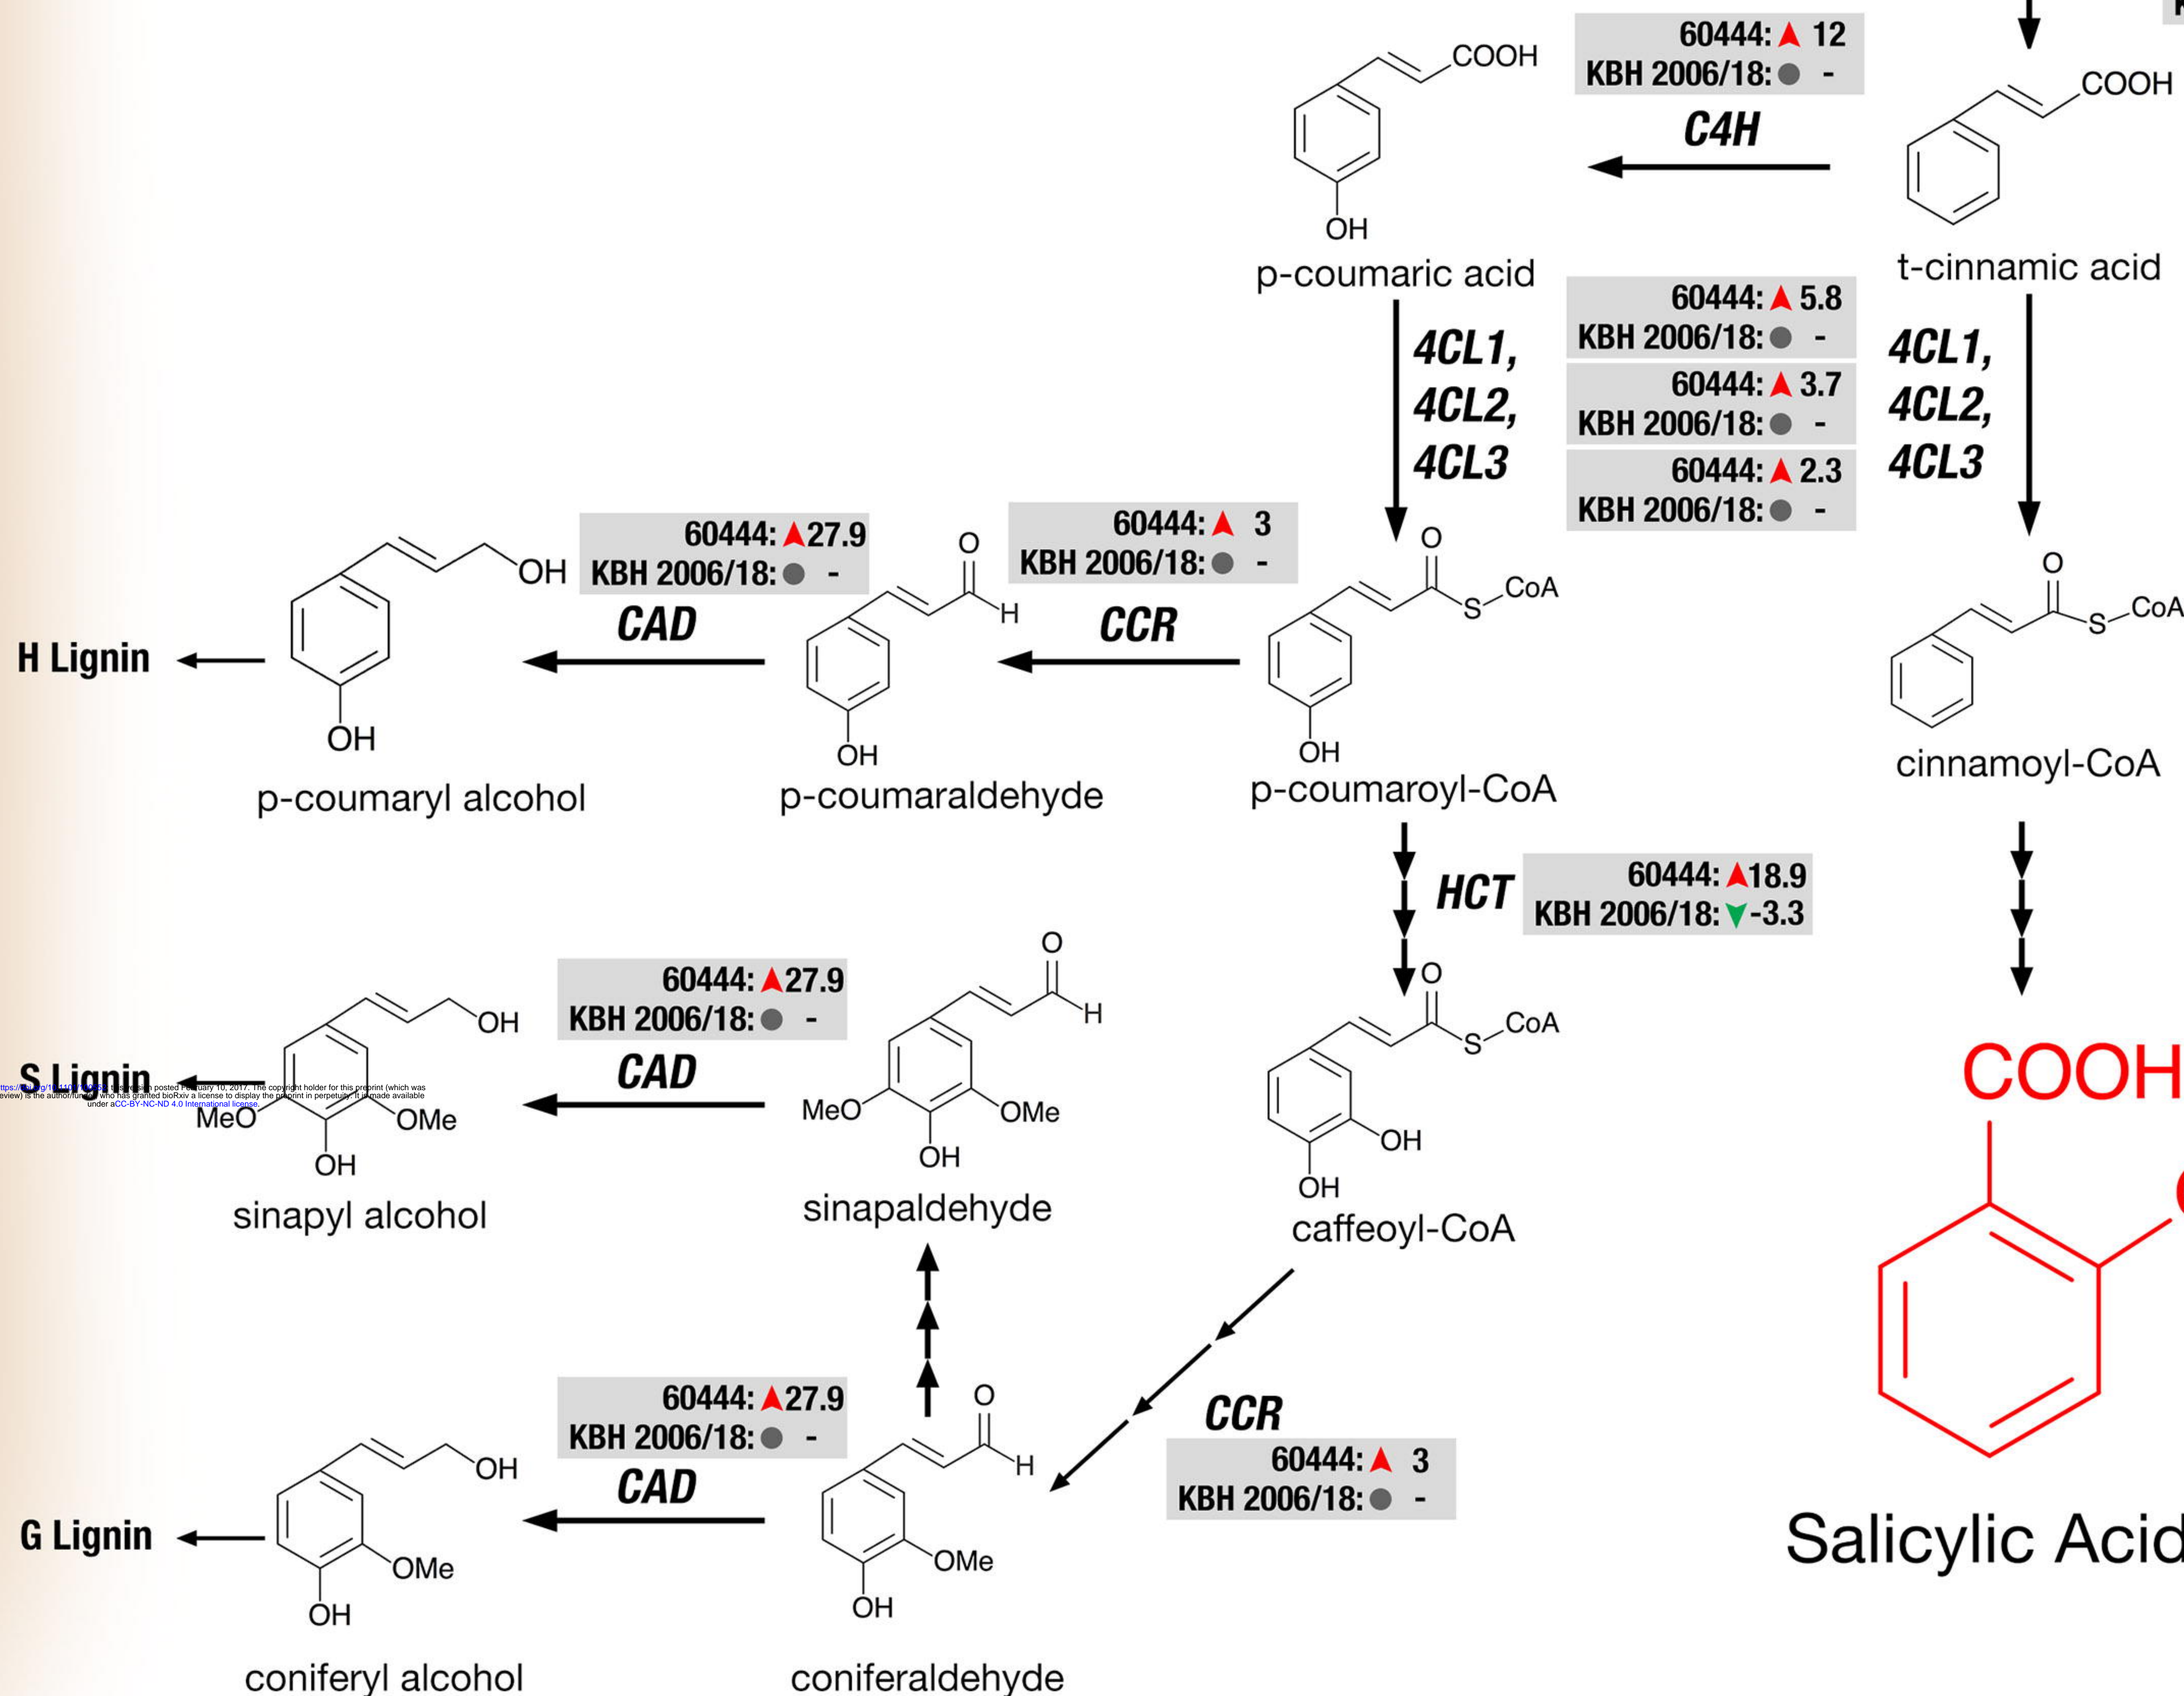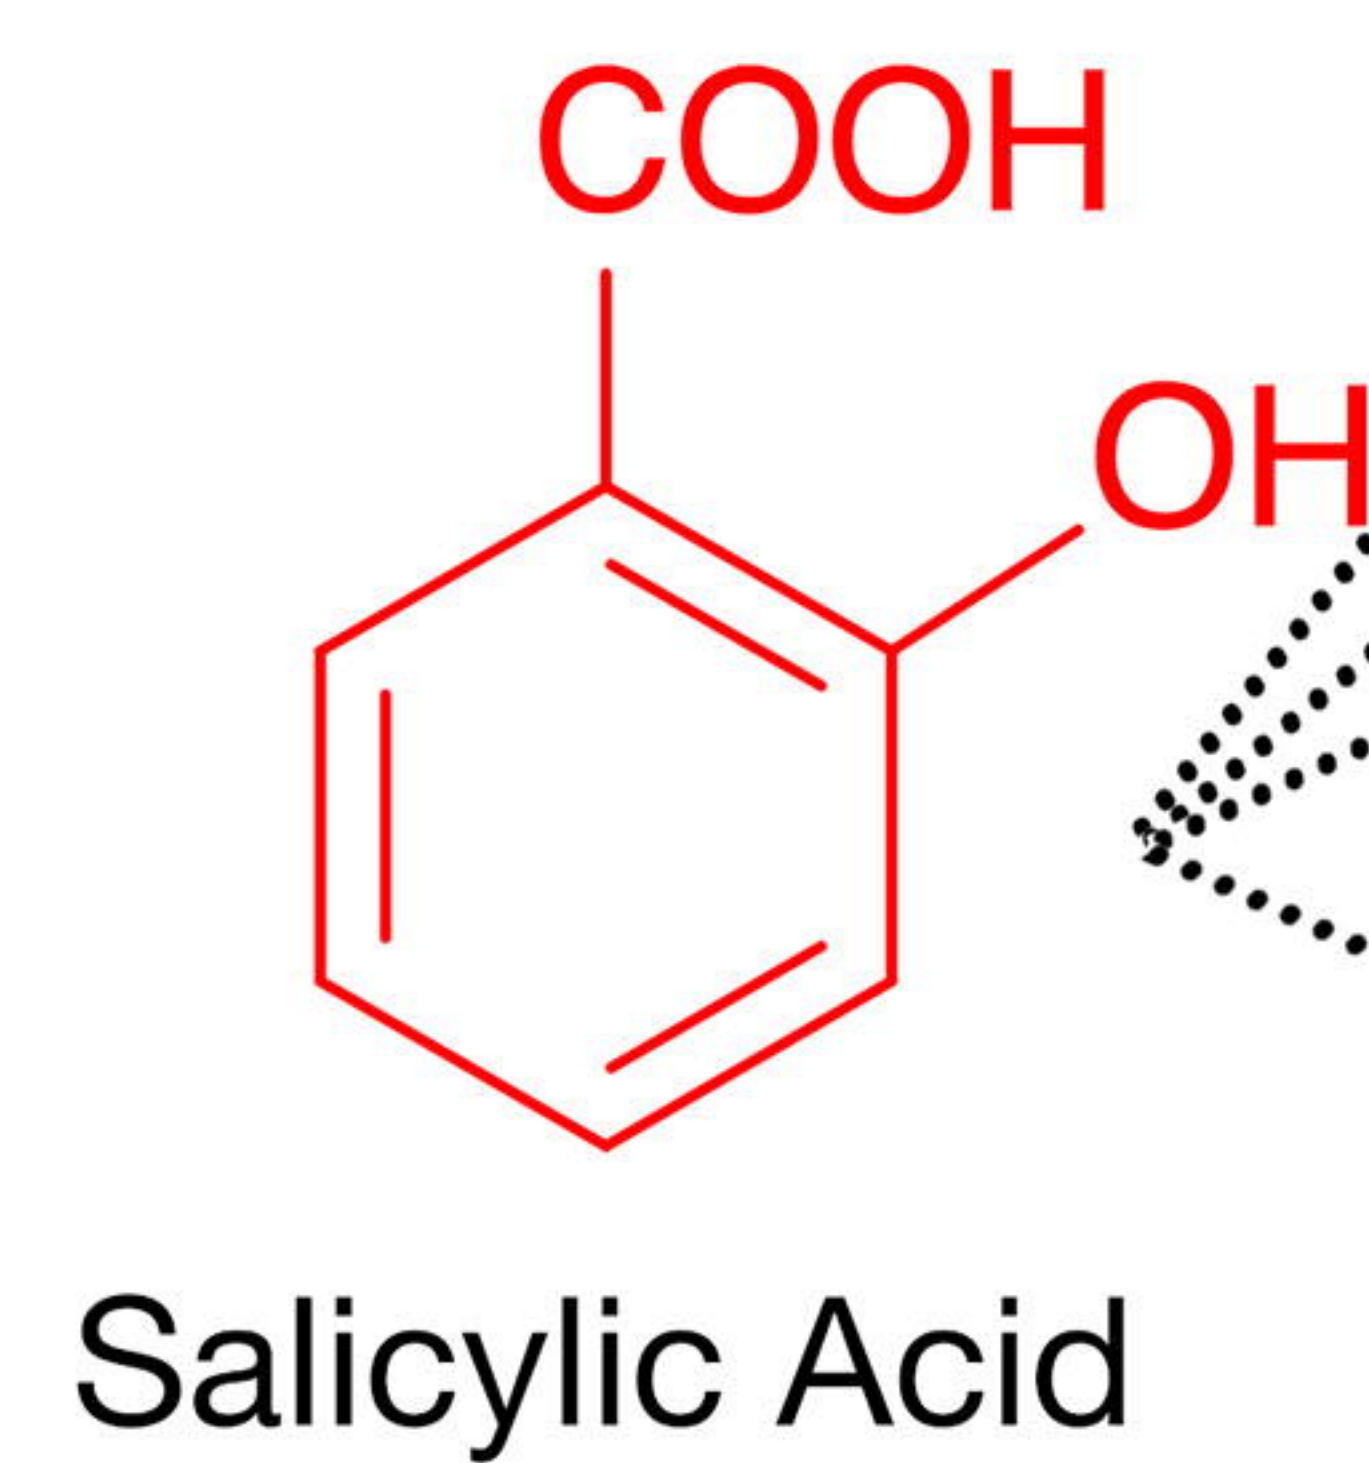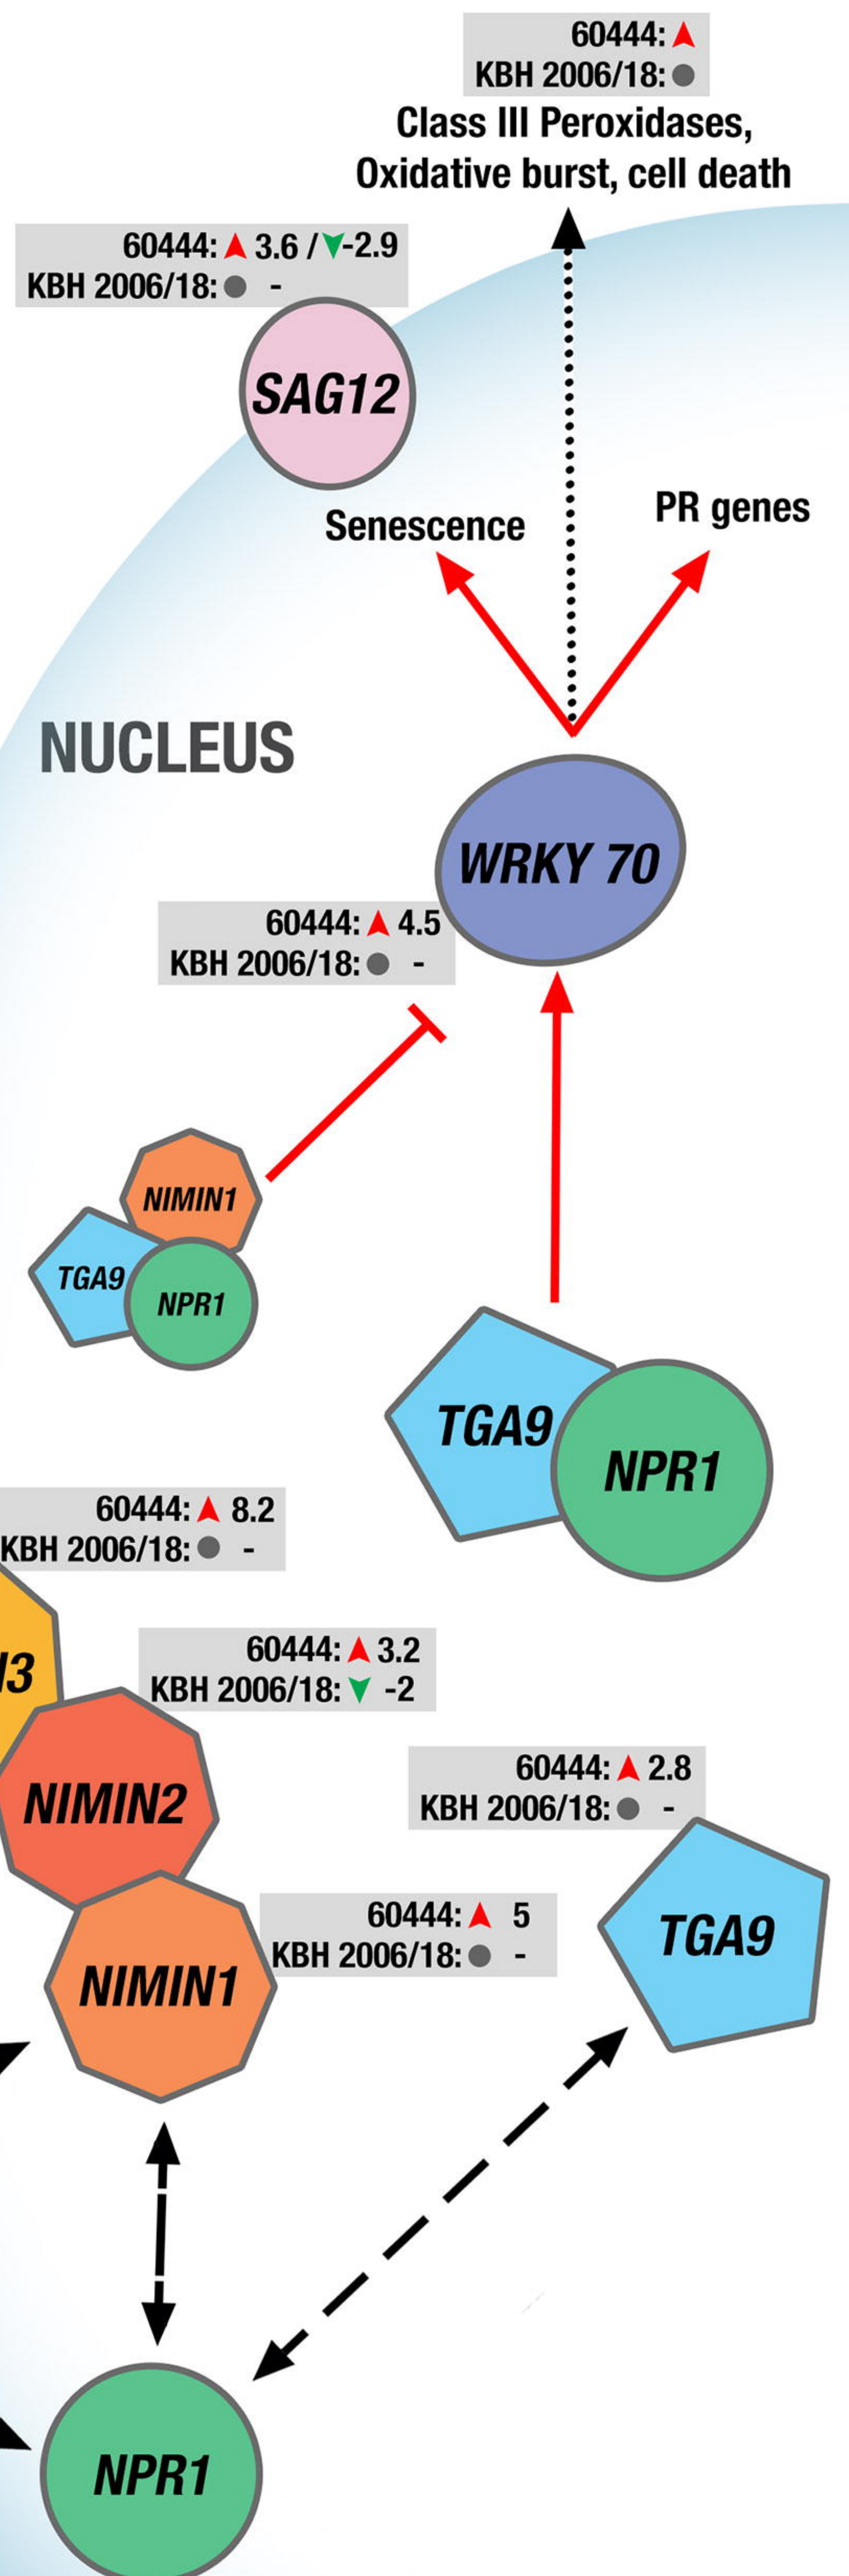







**a.**

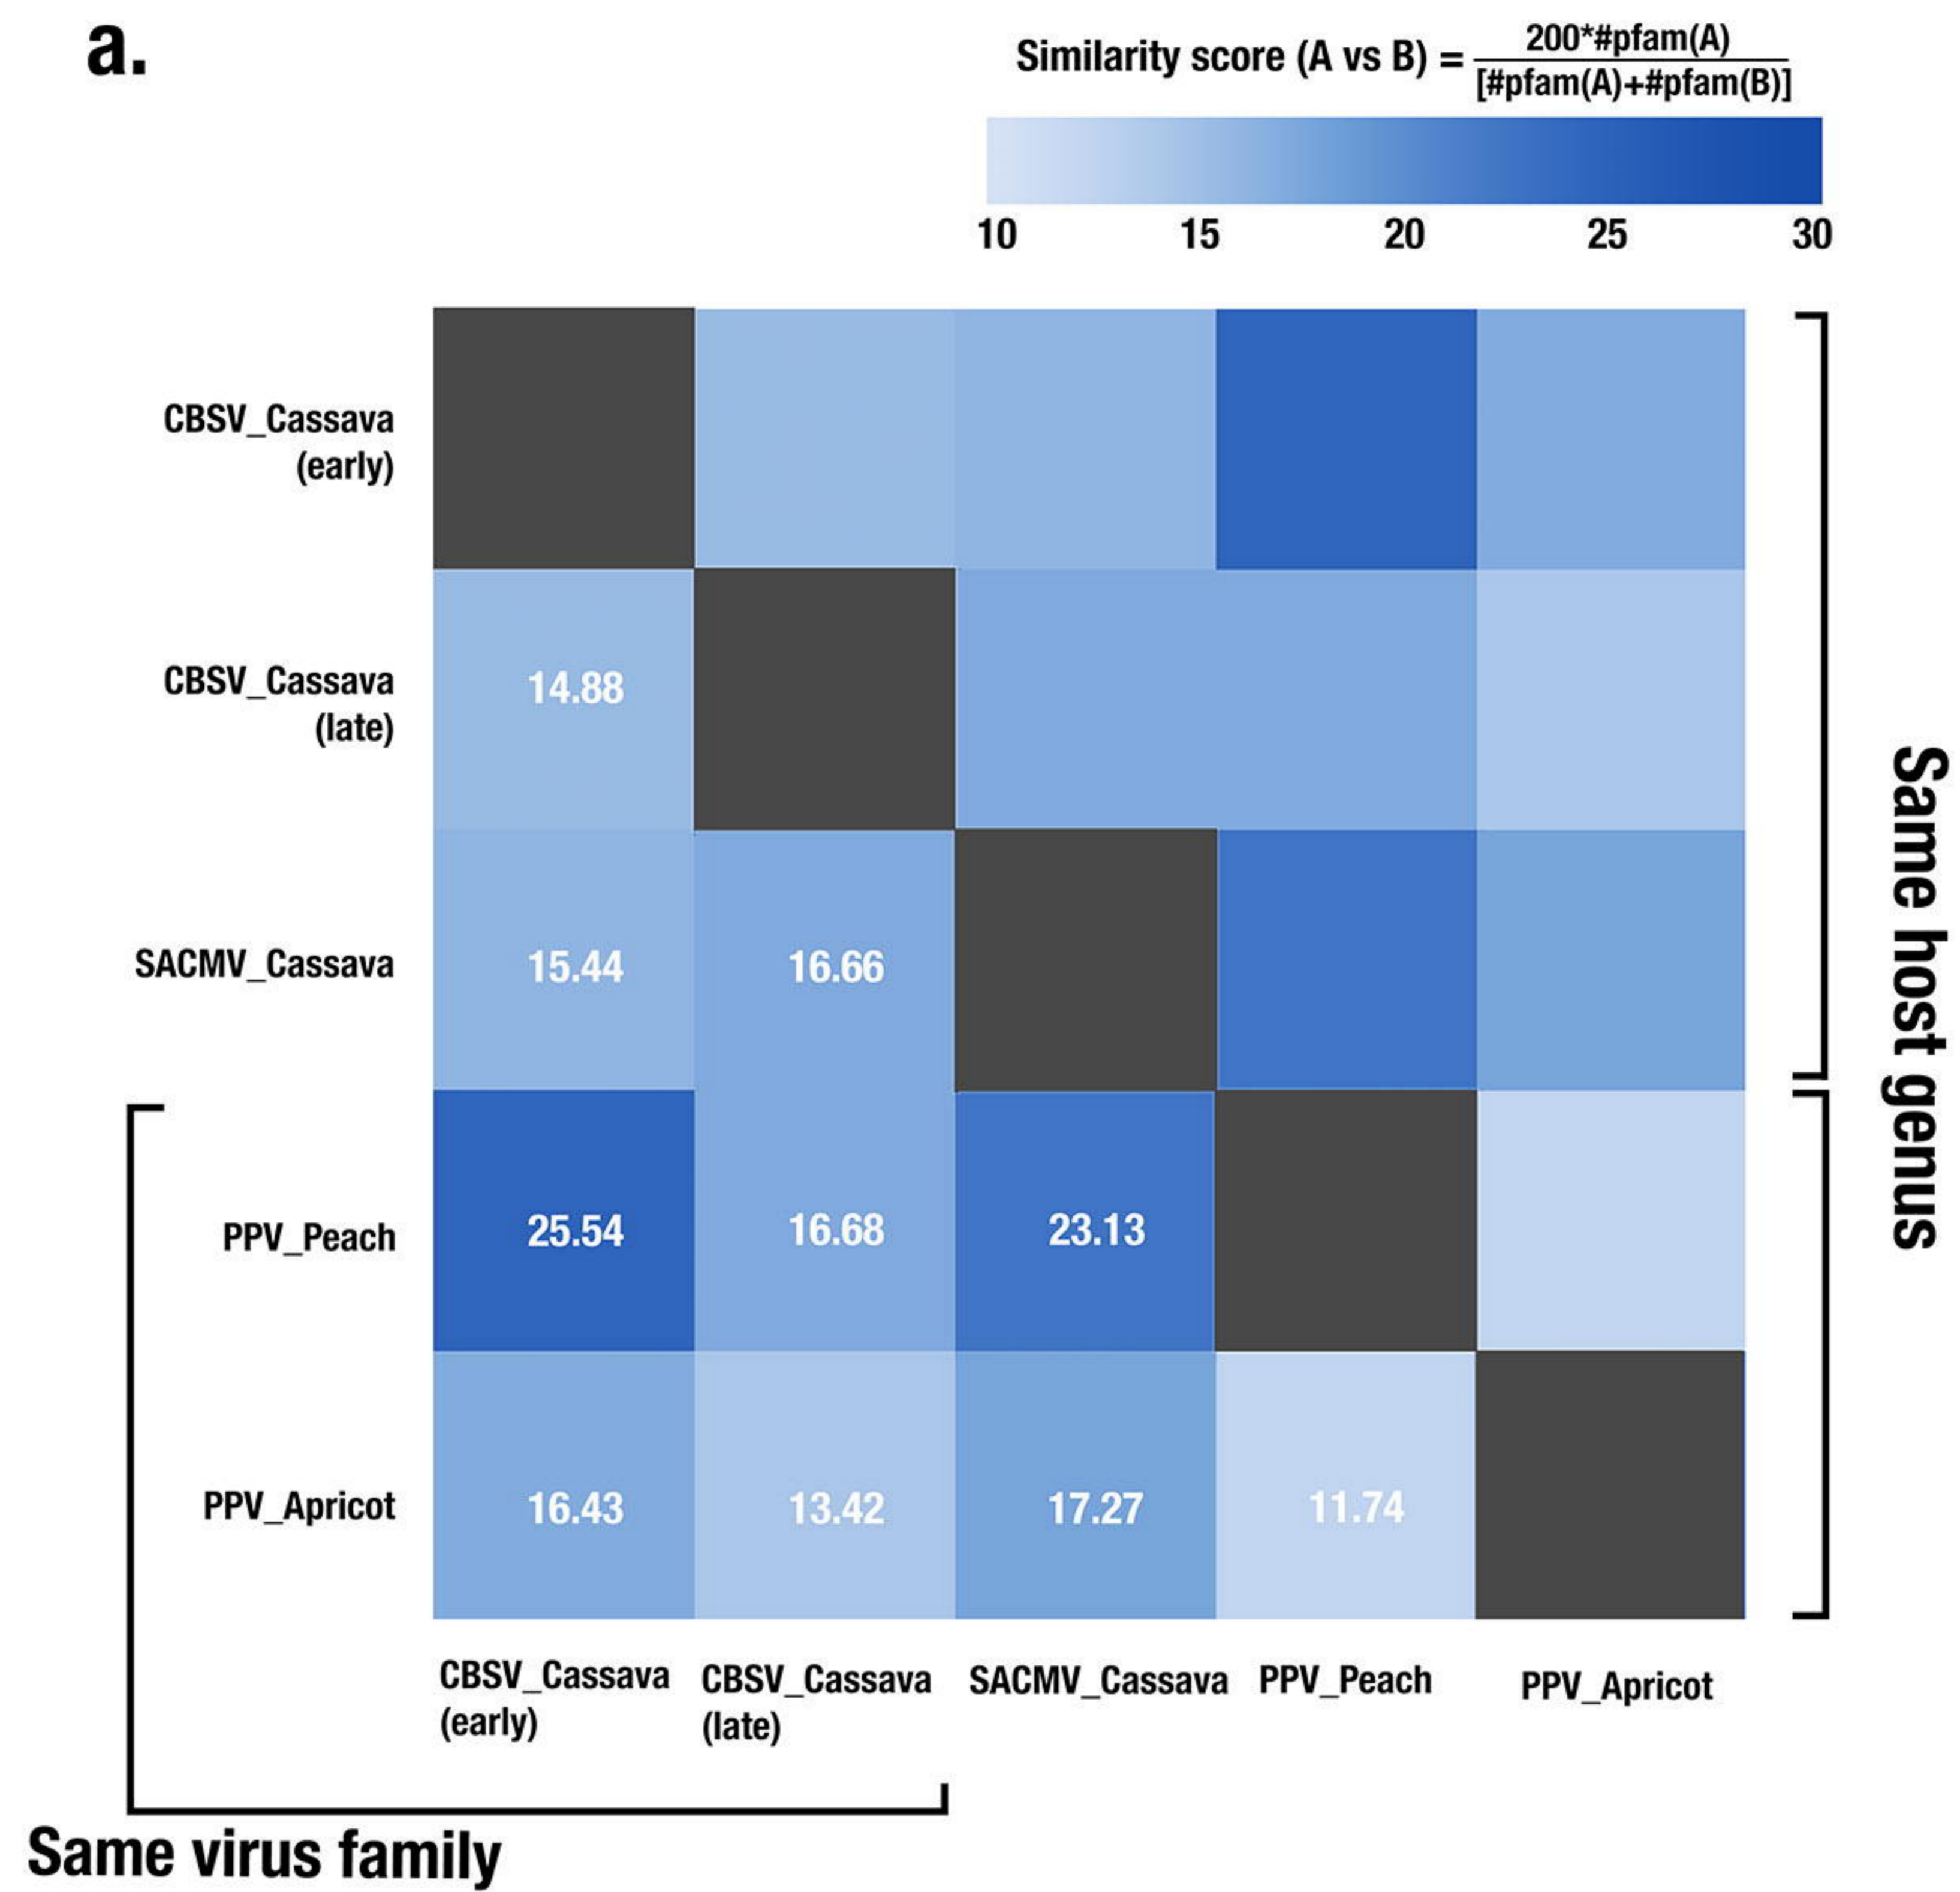

**b.**

**Up-regulated**

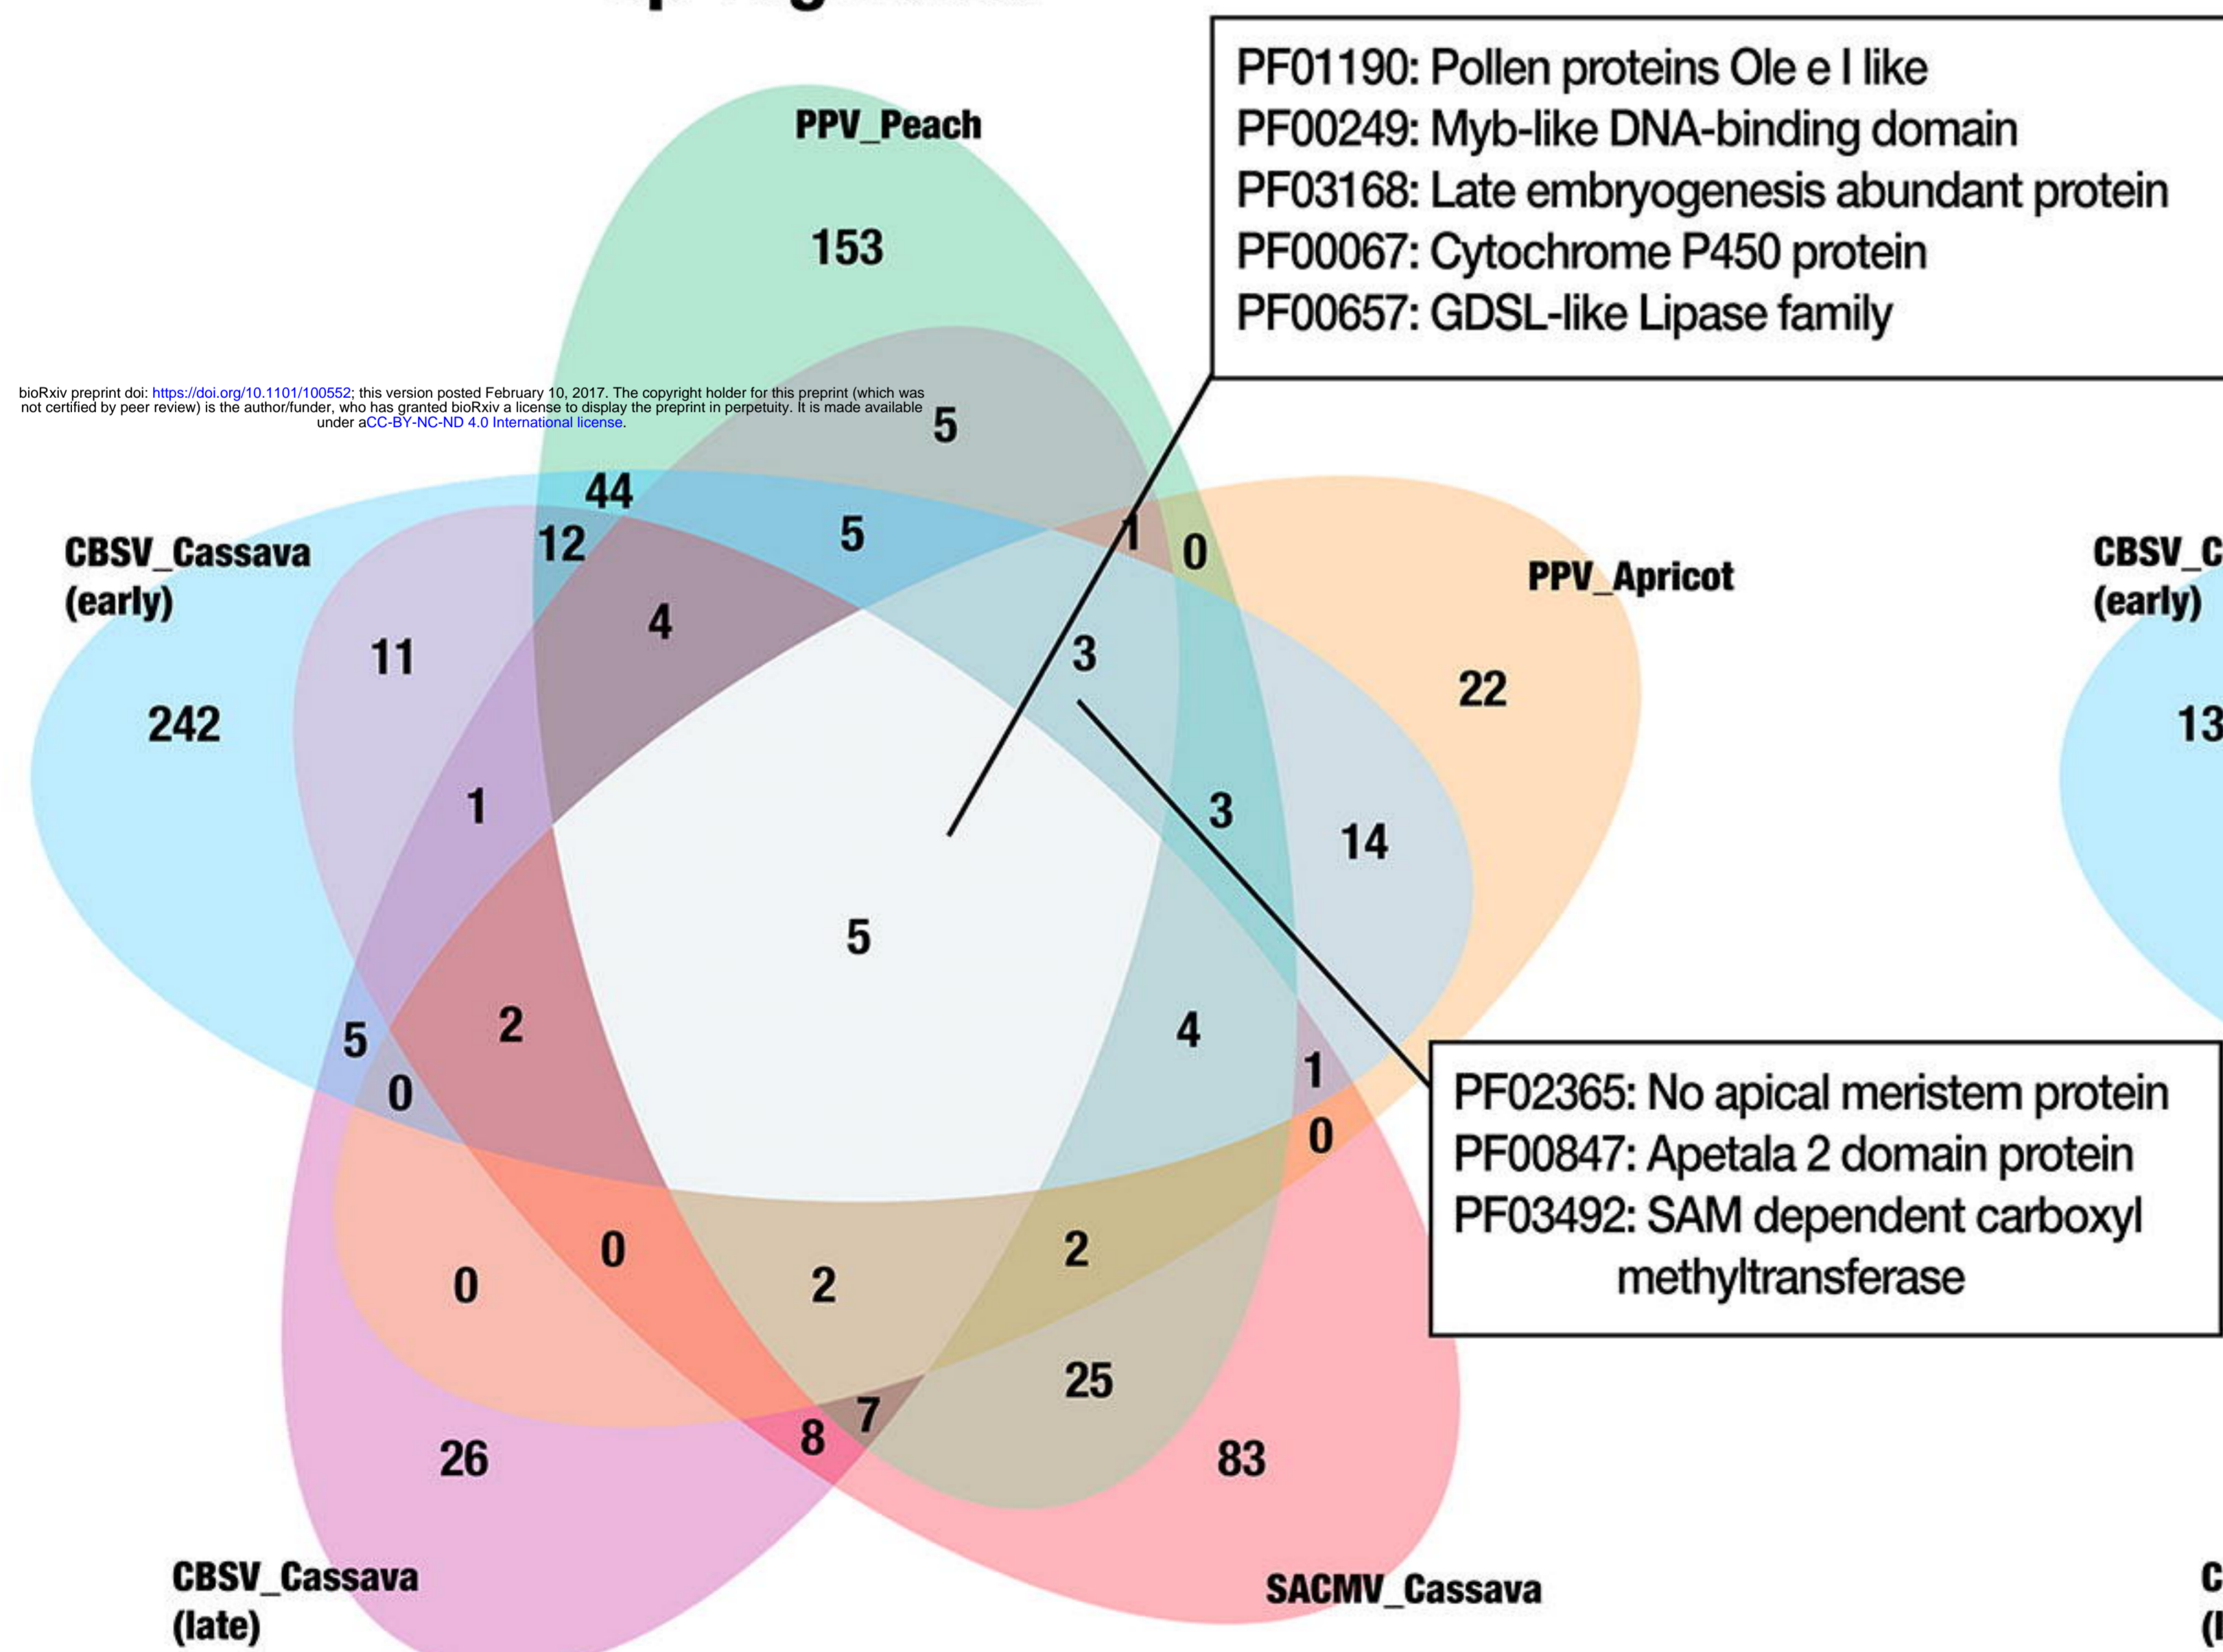

**c.**

**Down-regulated**

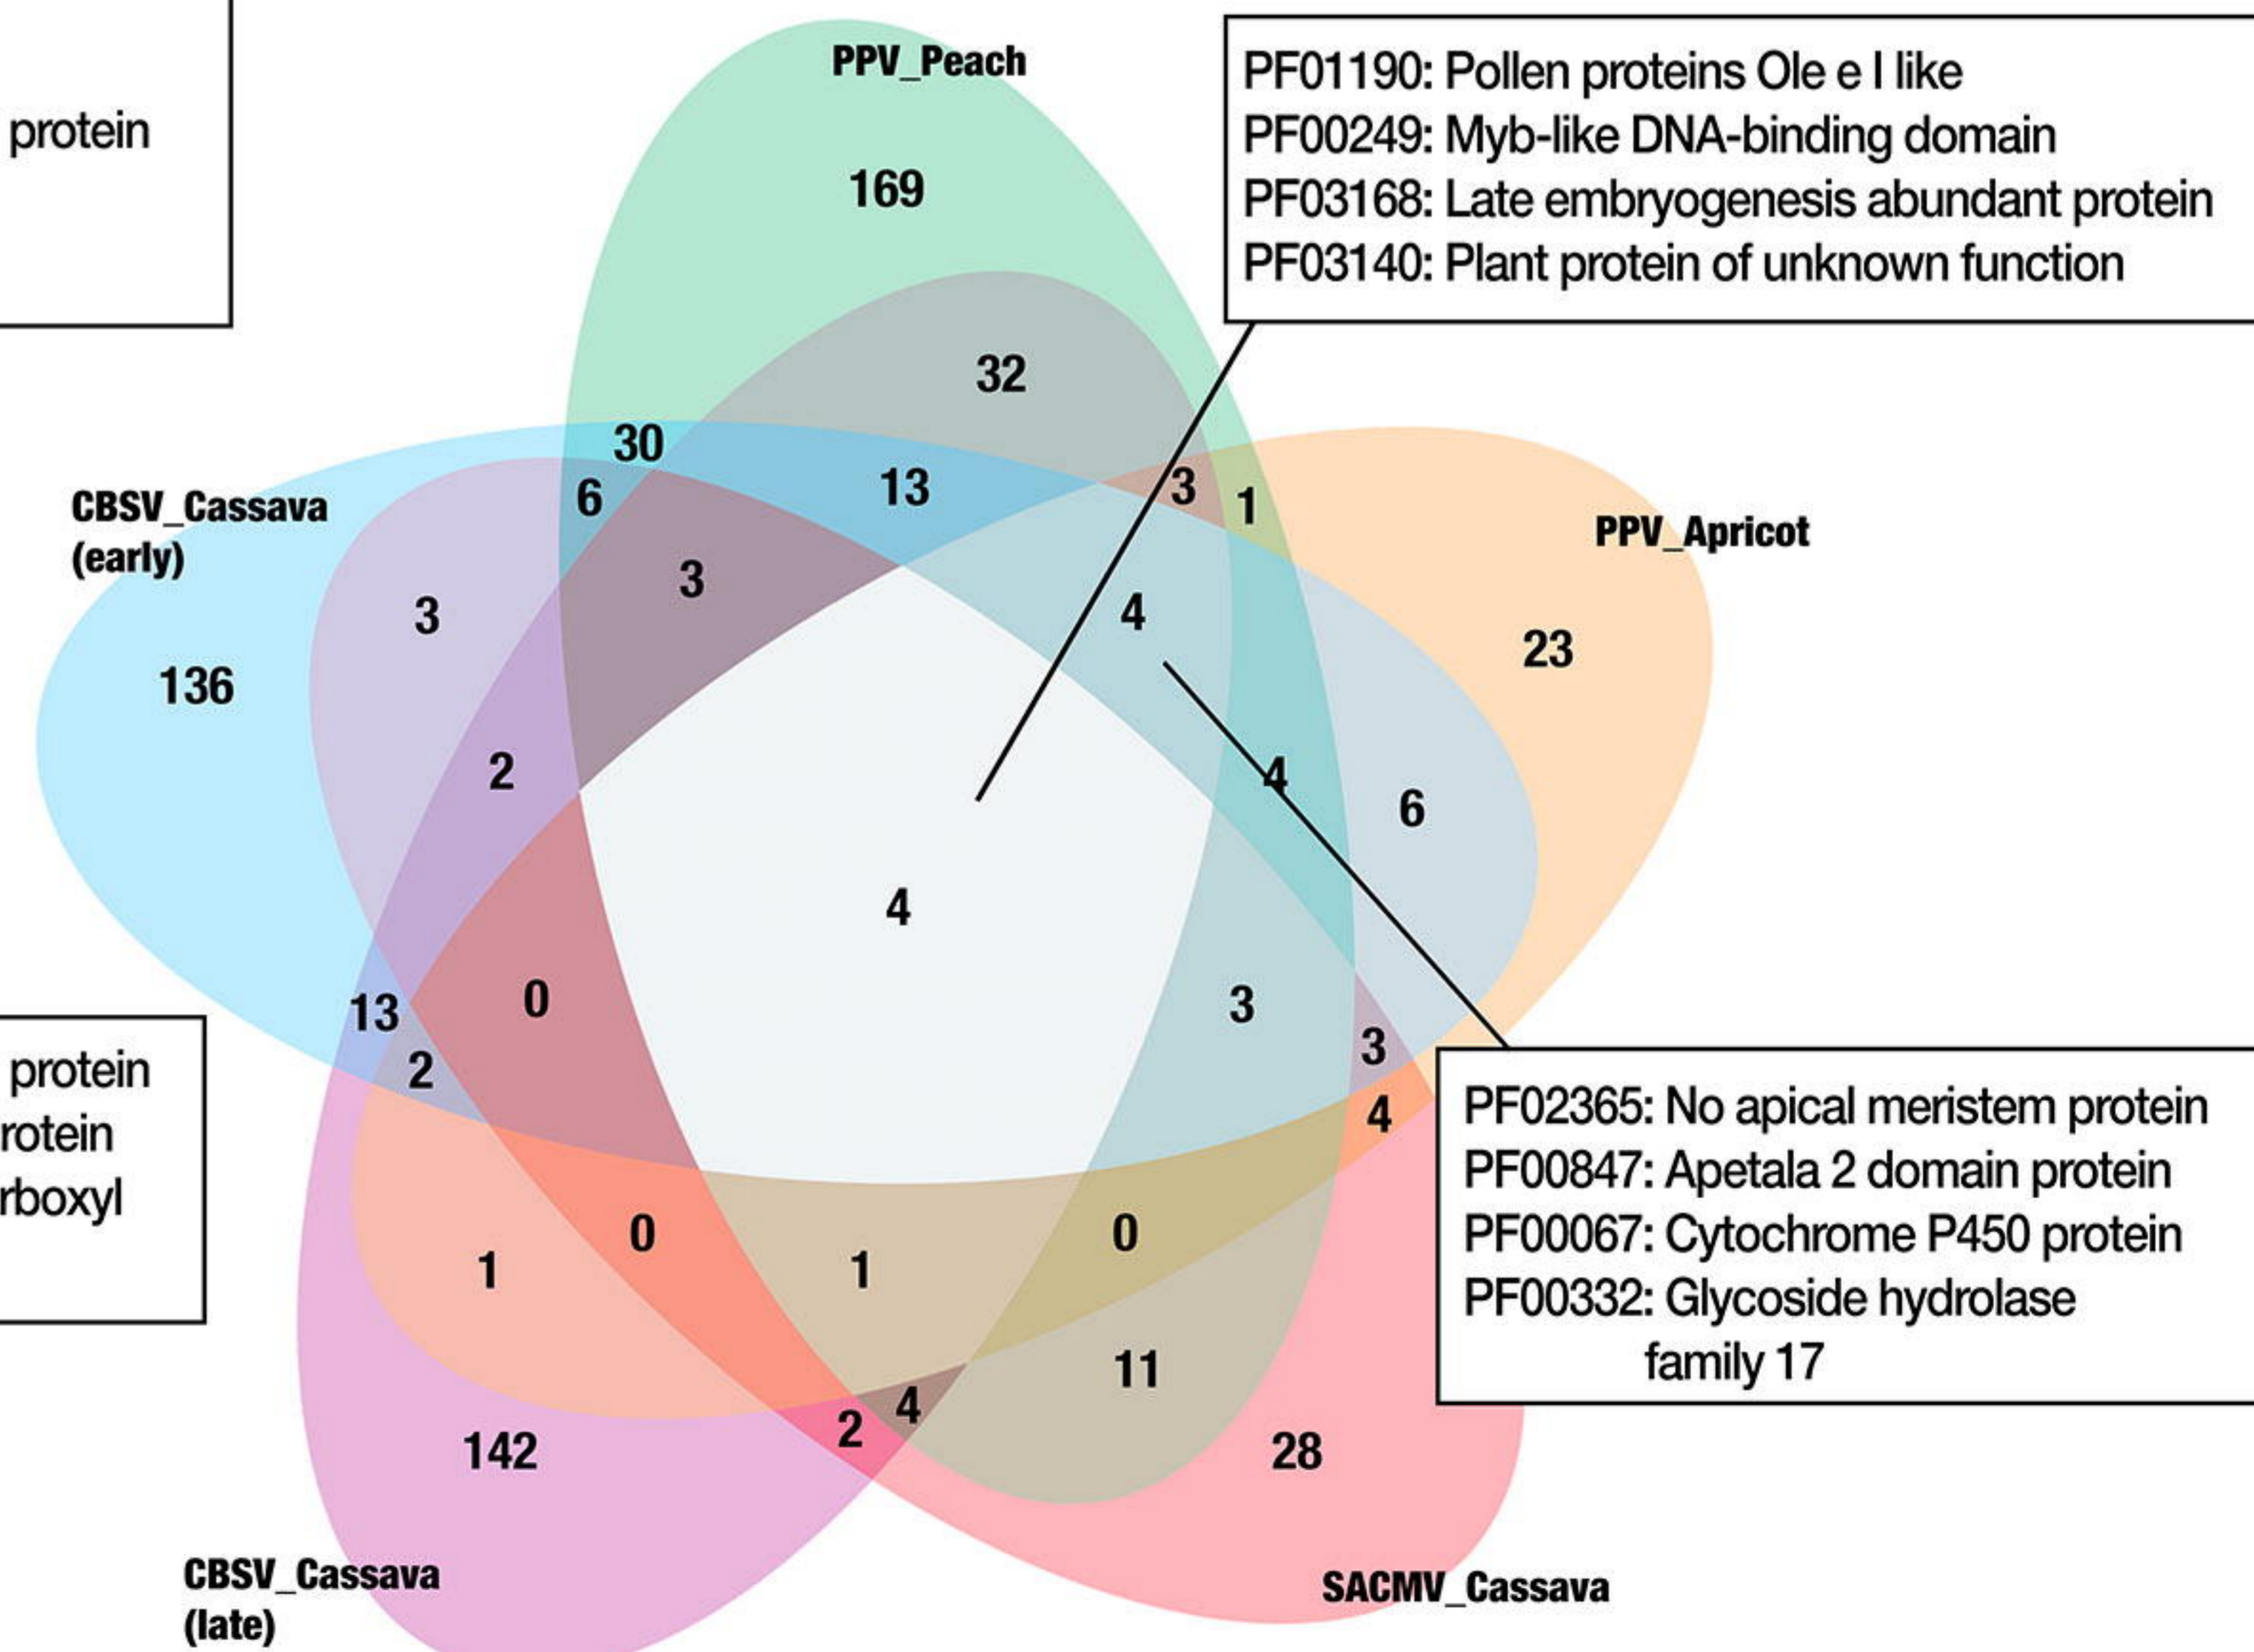

Source: http://biorxiv.org/content/10.1101/100552v4.full.pdf
